# Supplementary material for: Synthesis, Antibacterial Evaluation, and Computational Studies of a Diverse Set of Linezolid Conjugates
Source: MDPI journal article supplement (doi:10.3390/ph15020191), 2022-02-03
Supplement: s1 [file s1]

## Supplementary Information

### Synthesis, Antibacterial Evaluation, and Computational Studies of a Diverse Set of Linezolid Conjugates

Riham M. Bokhtia <sup>1,2</sup>, Adel S. Girgis <sup>3</sup>, Tarek S. Ibrahim <sup>4</sup>, Fatma Rasslan <sup>5</sup>, Eman S. Nossier <sup>6</sup>, Reham F. Barghash <sup>3</sup>, Rajeev Sakhuja <sup>7</sup>, Eatedal H. Abdel-Aal <sup>1</sup>, Siva S. Panda <sup>2,\*</sup> and Amany M. M. Al-Mahmoudy <sup>1</sup>

<sup>1</sup> Department of Pharmaceutical Organic Chemistry, Faculty of Pharmacy, Zagazig University, Zagazig 44519, Egypt; [rehamabdelreham@yahoo.com](mailto:rehamabdelreham@yahoo.com) (R.M.B.); [eatedalabdelaal@yahoo.com](mailto:eatedalabdelaal@yahoo.com) (E.H.A.-A.); [amanysinger77@gmail.com](mailto:amanysinger77@gmail.com) (A.M.M.A.-M.)

<sup>2</sup> Department of Chemistry and Physics, Augusta University, Augusta, GA 30912, USA

<sup>3</sup> Department of Pesticide Chemistry, National Research Centre, Dokki, Giza 12622, Egypt; [girgisas10@yahoo.com](mailto:girgisas10@yahoo.com) (A.S.G.); [reham\\_fawzy@yahoo.com](mailto:reham_fawzy@yahoo.com) (R.F.B.)

<sup>4</sup> Department of Pharmaceutical Chemistry, Faculty of Pharmacy, King Abdulaziz University, Jeddah 21589, Saudi Arabia; [tmabraham@kau.edu.sa](mailto:tmabraham@kau.edu.sa) (T.S.I.)

<sup>5</sup> Department of Microbiology and Immunology, Faculty of Pharmacy (Girls), Al Azhar University, Cairo 11651, Egypt; [fatma\\_rasslan@yahoo.com](mailto:fatma_rasslan@yahoo.com) (F.R.)

<sup>6</sup> Department of Pharmaceutical Medicinal Chemistry and Drug Design, Faculty of Pharmacy (Girls), Al-Azhar University, Cairo 11651, Egypt; [dr.emannossier@gmail.com](mailto:dr.emannossier@gmail.com) (E.S.N)

<sup>7</sup> Department of Chemistry, Birla Institute of Technology and Science, Pilani 333031, India; [sakhuja.rajeev@gmail.com](mailto:sakhuja.rajeev@gmail.com) (R.S.)

\* Correspondence: [sspanda12@gmail.com](mailto:sspanda12@gmail.com) or [sipanda@augusta.edu](mailto:sipanda@augusta.edu)

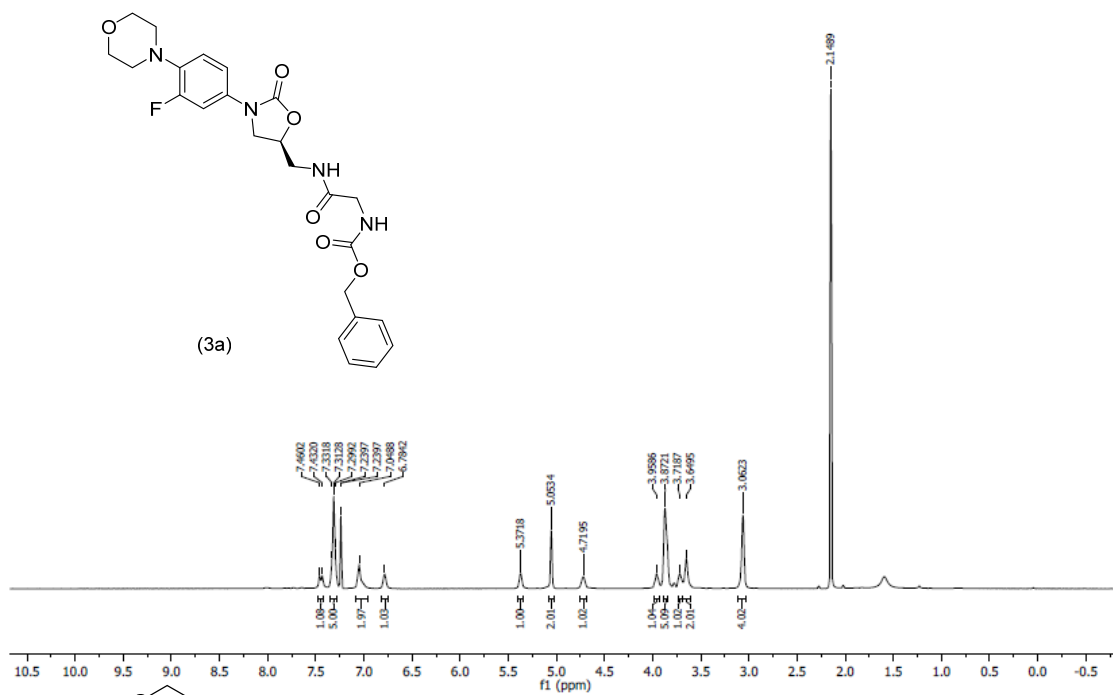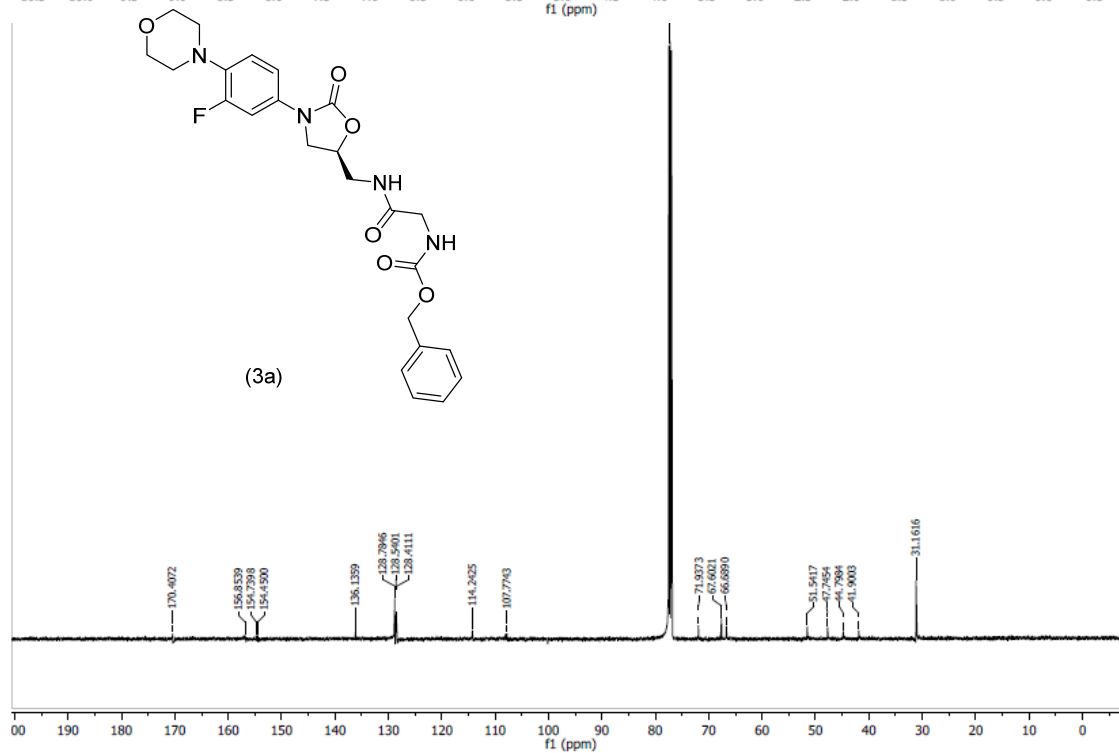



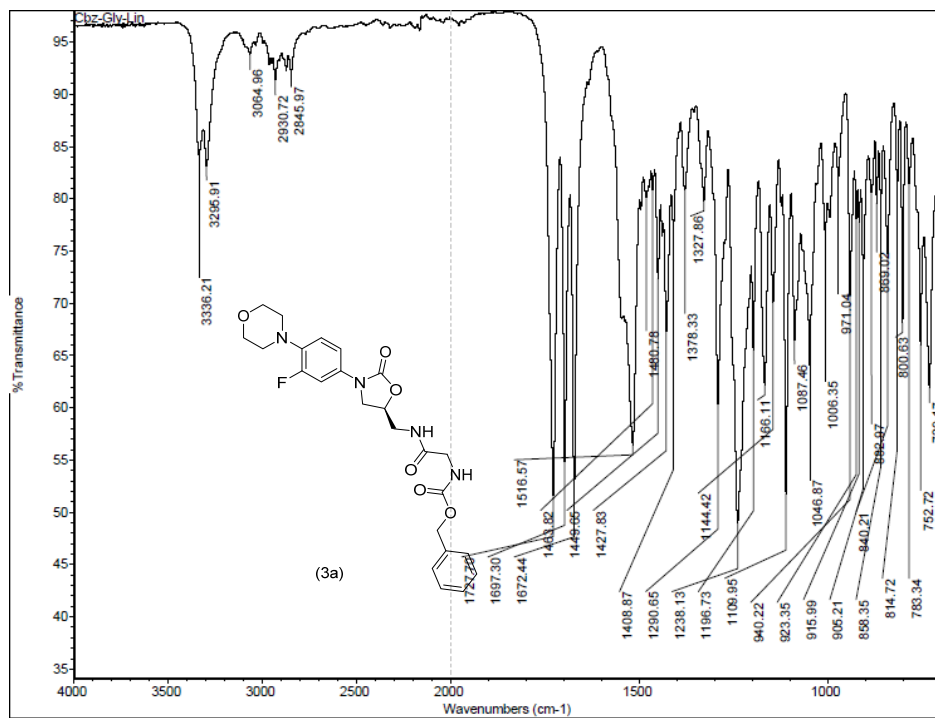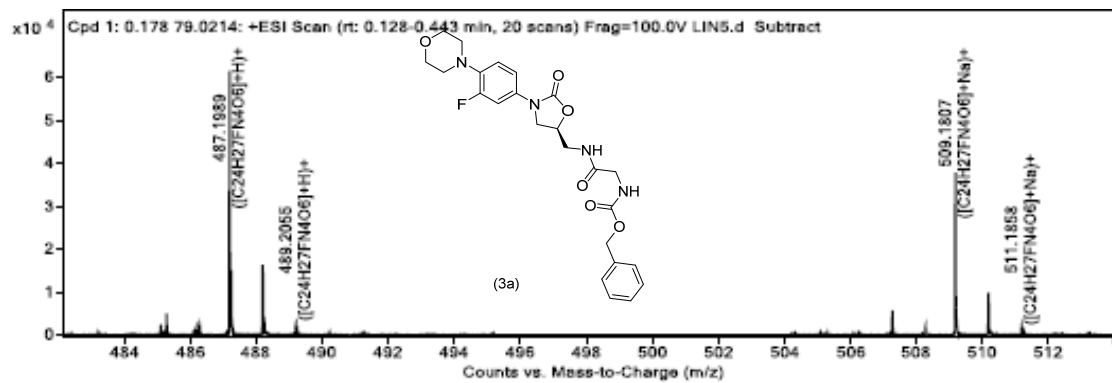

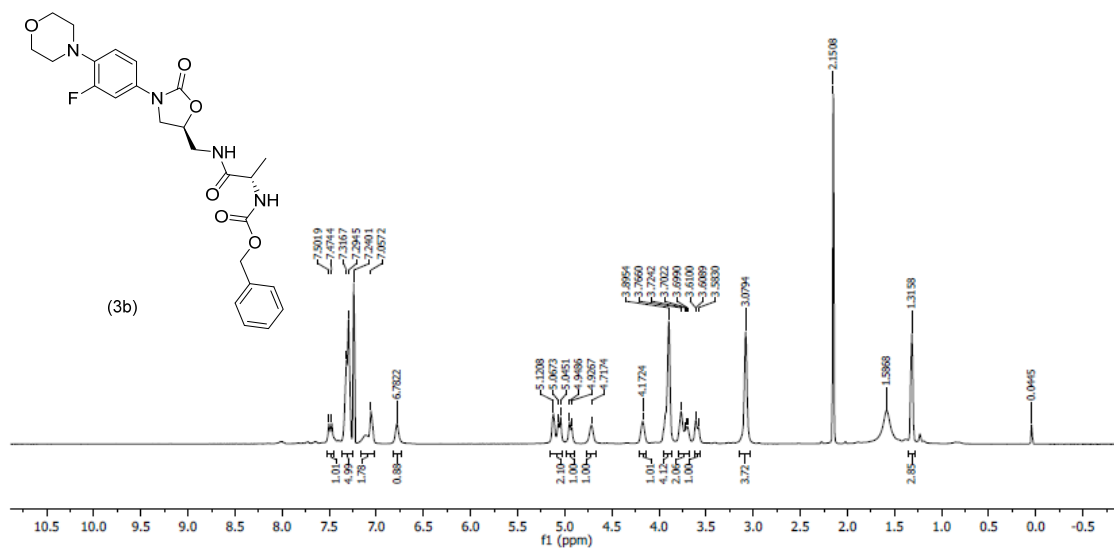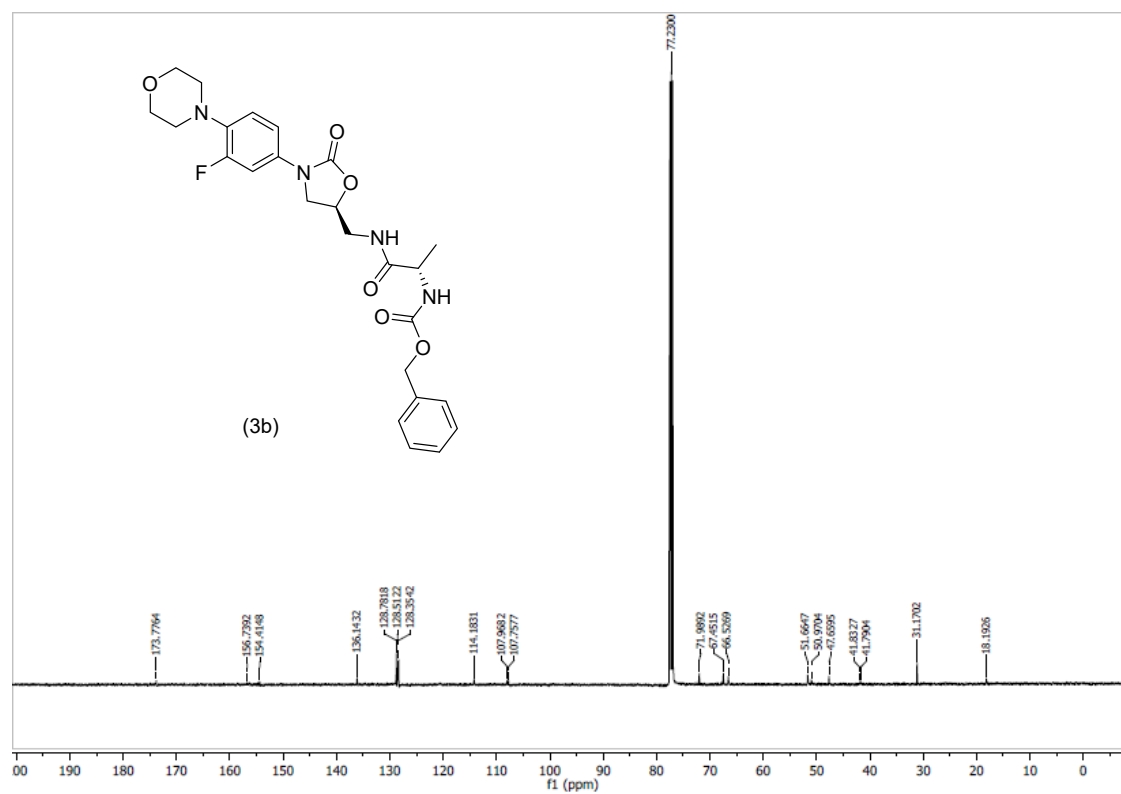

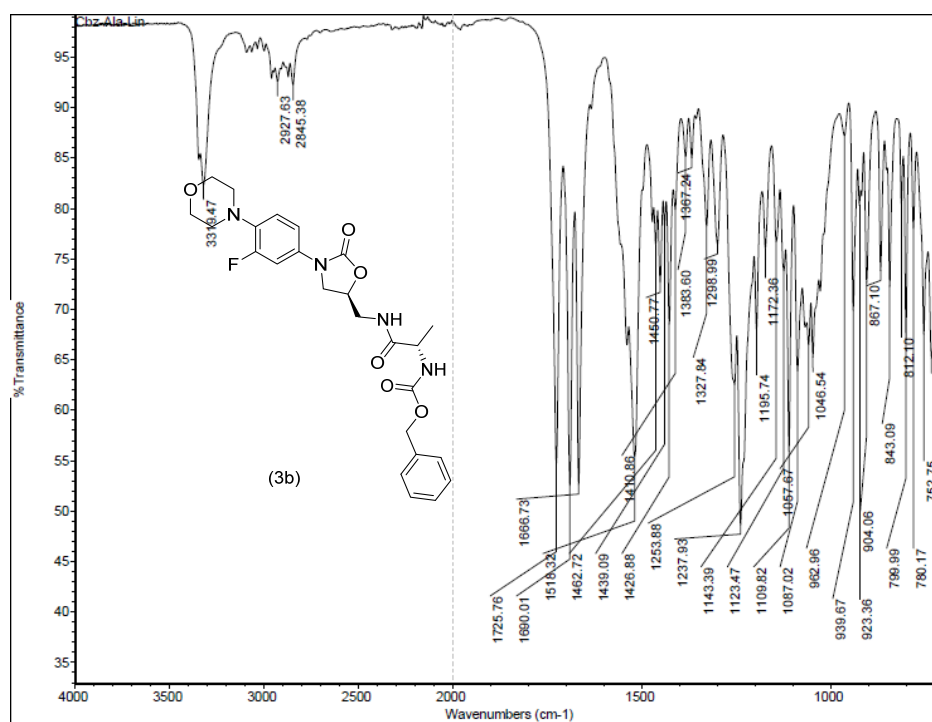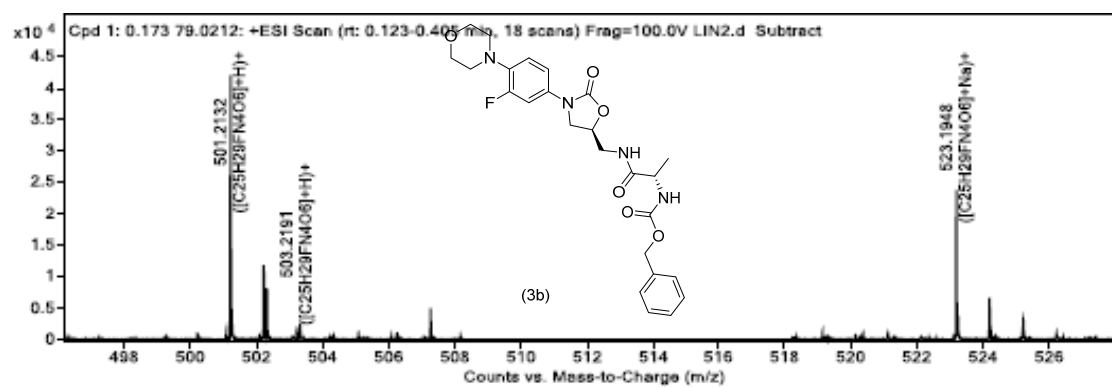

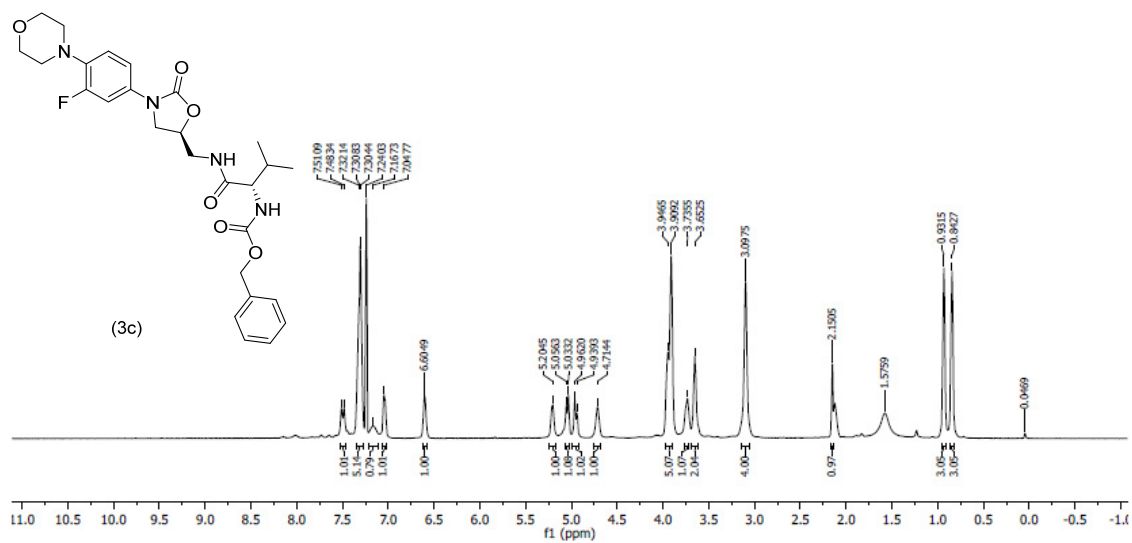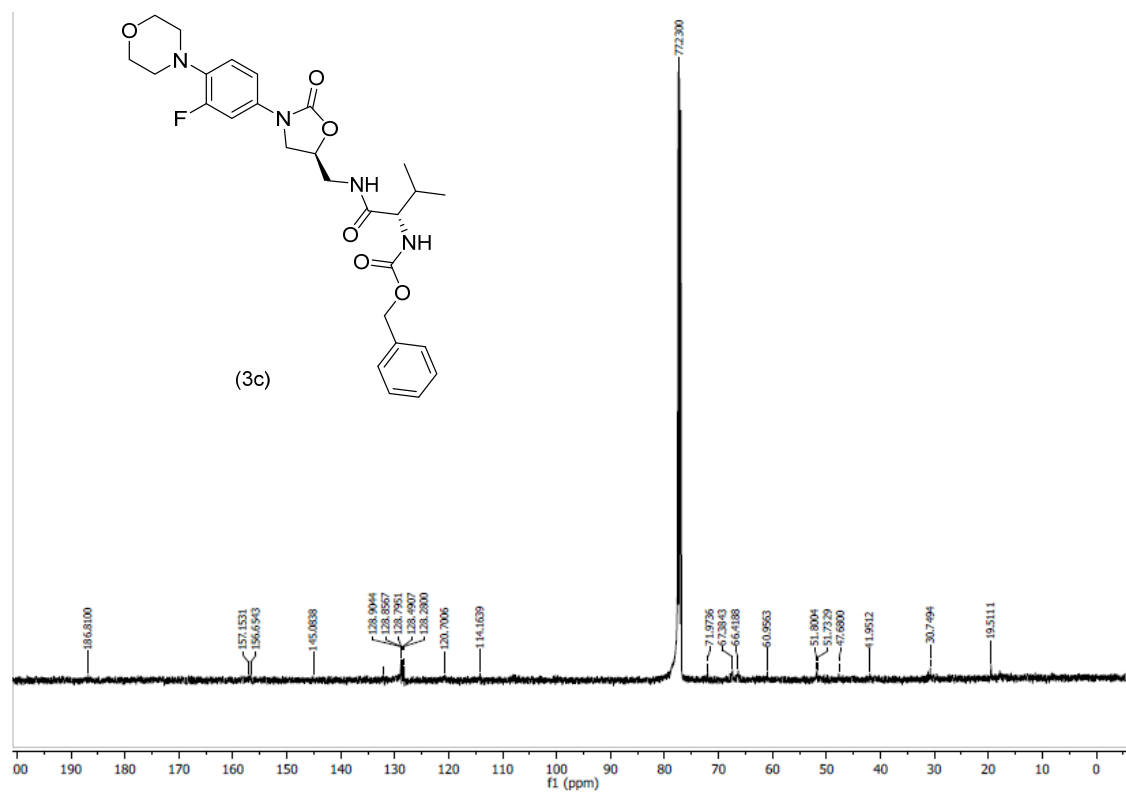

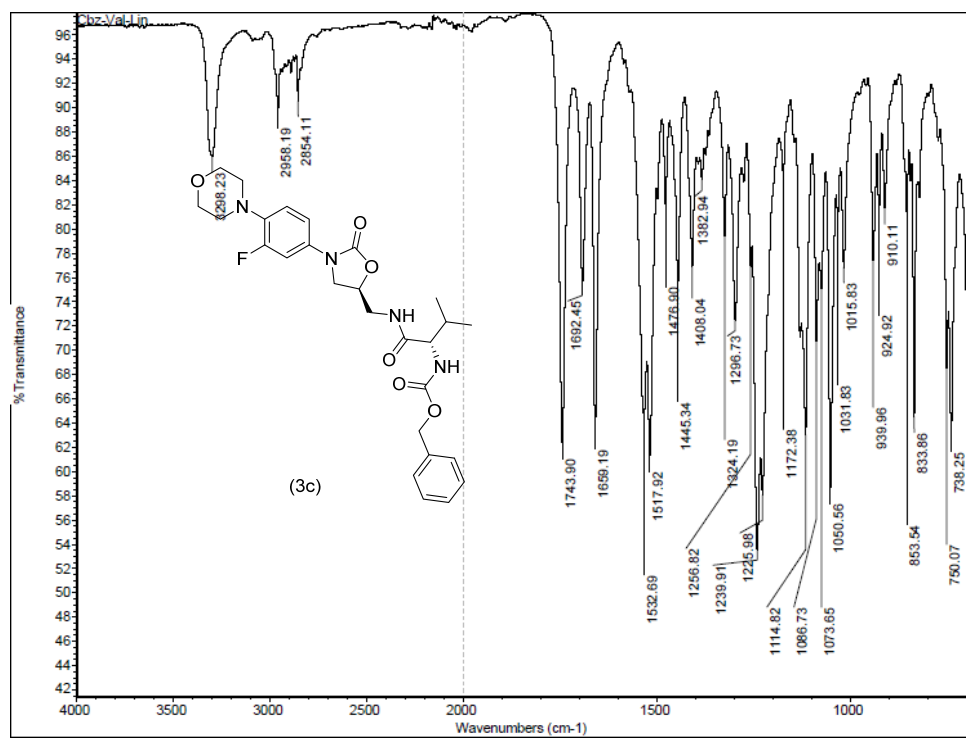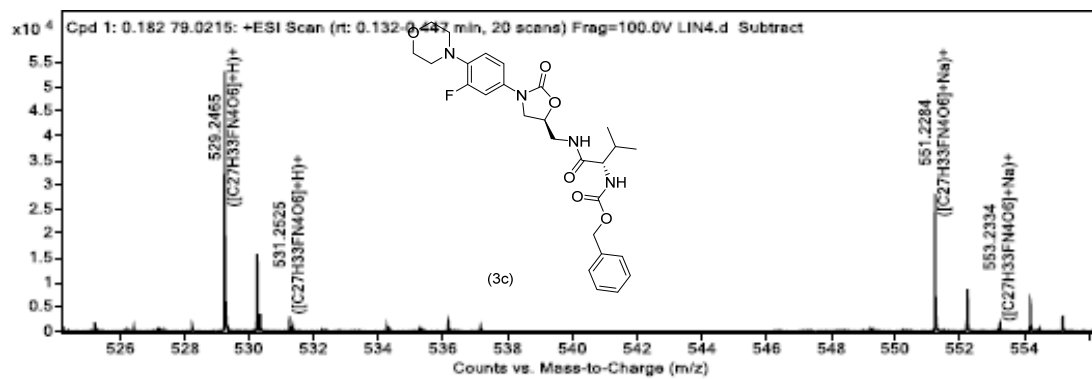

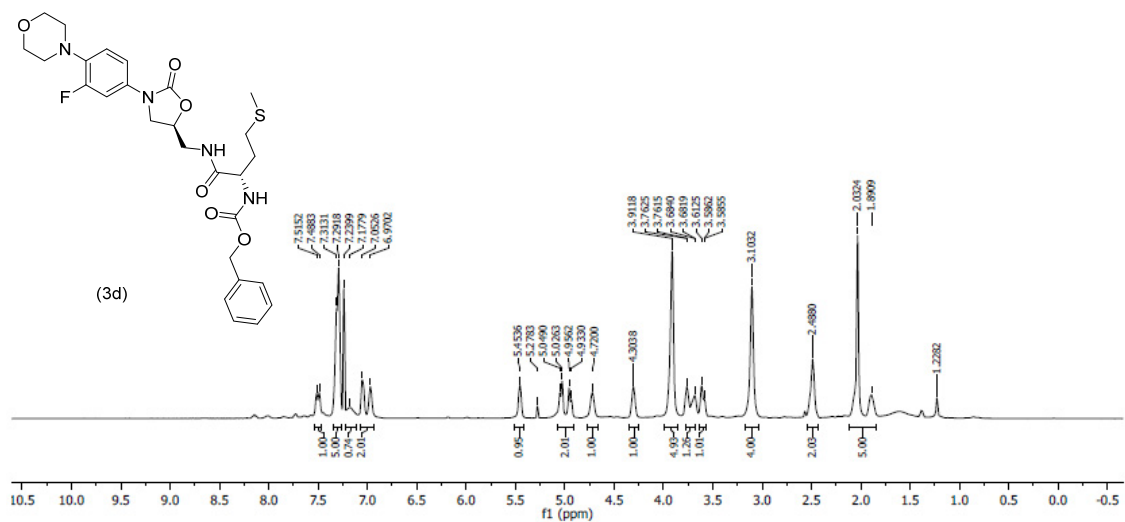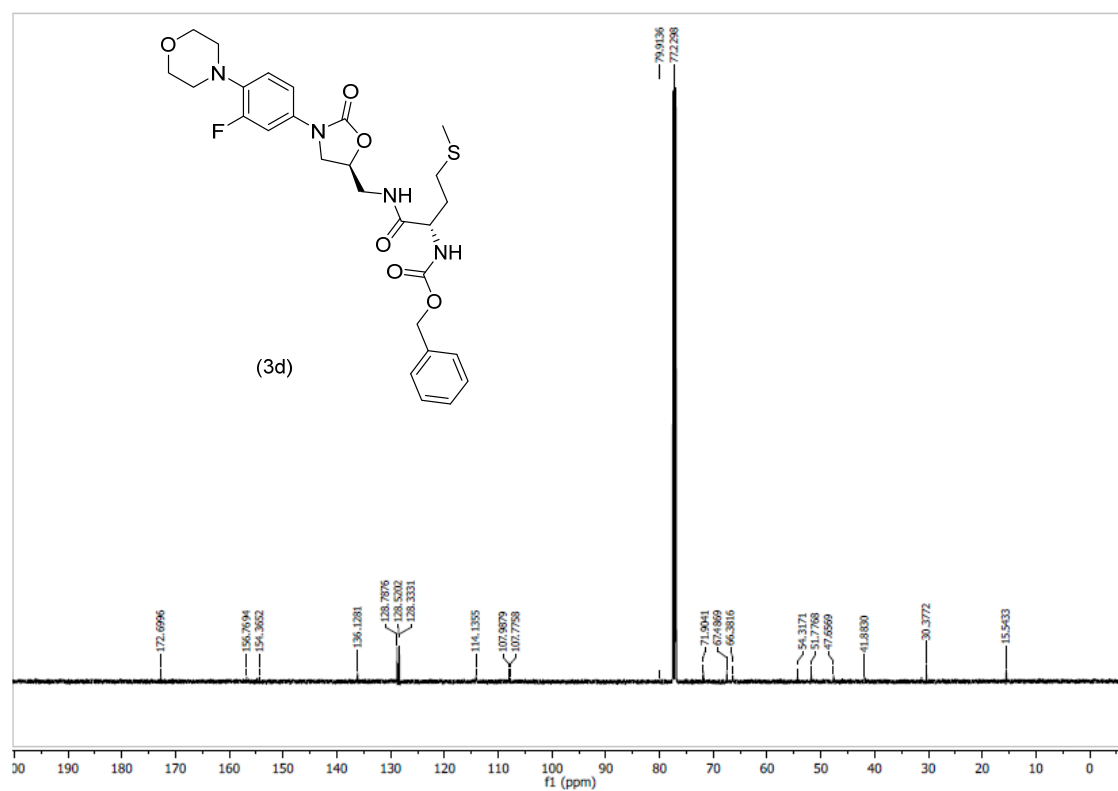

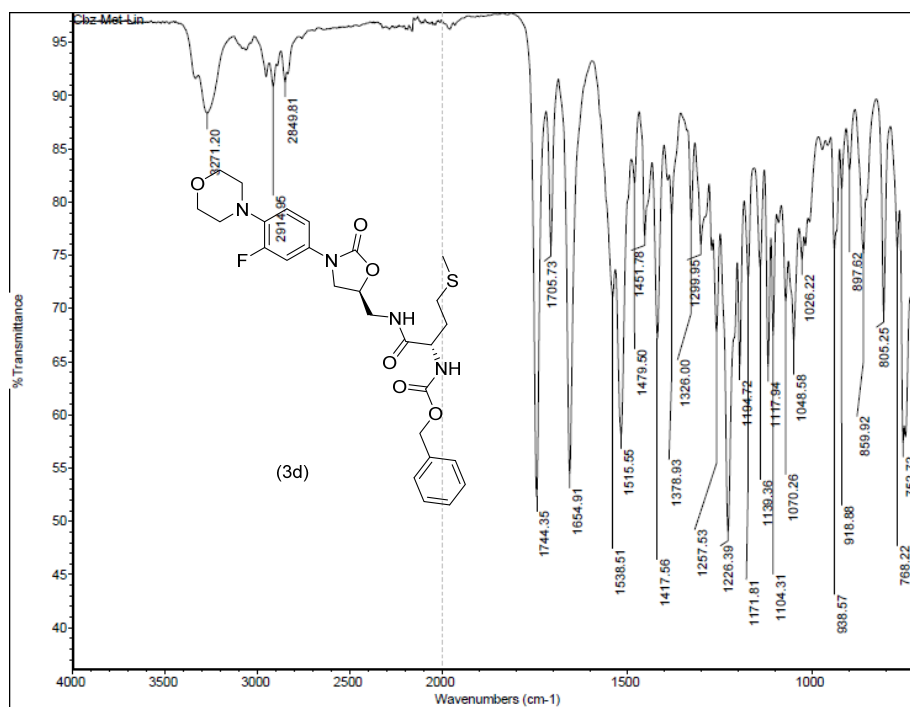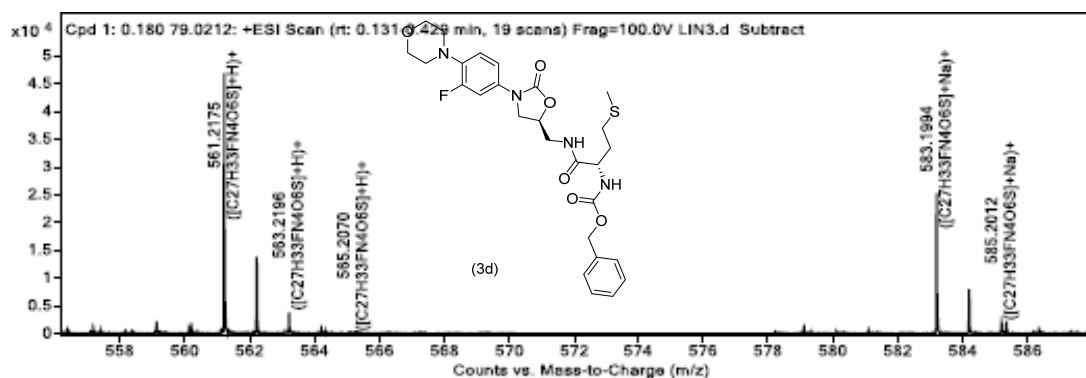

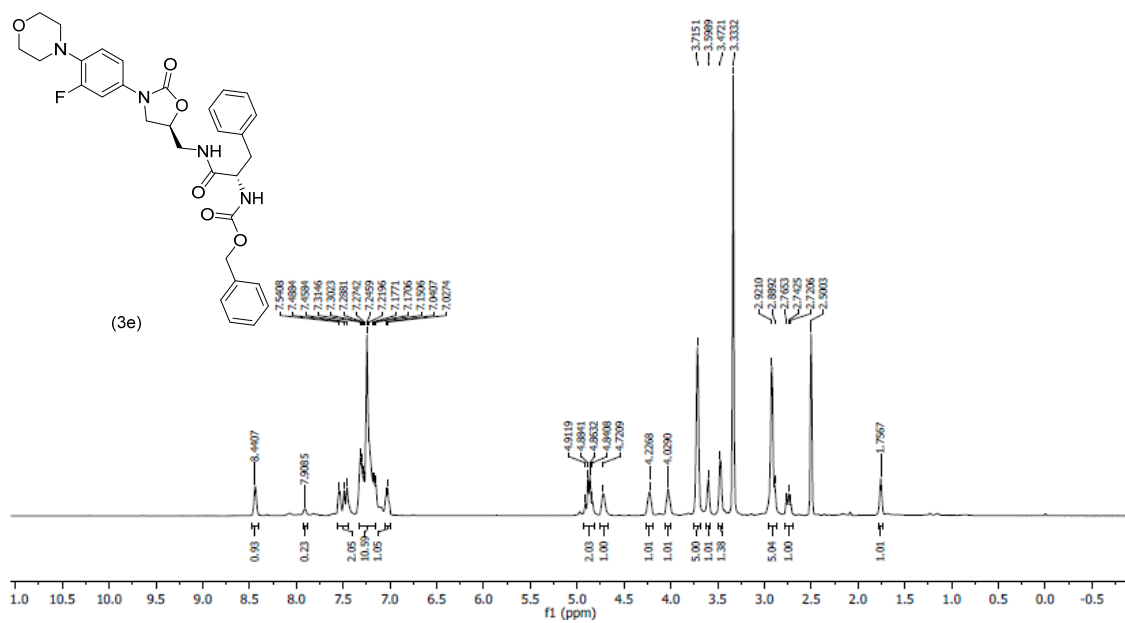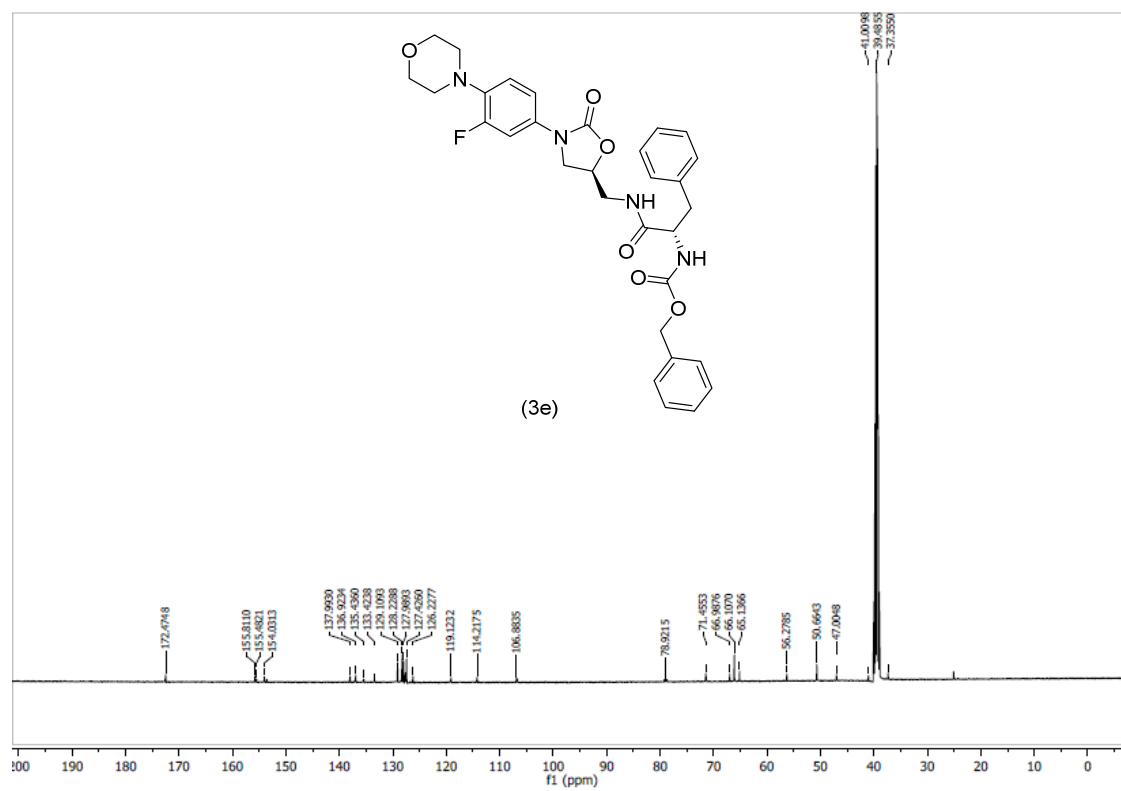



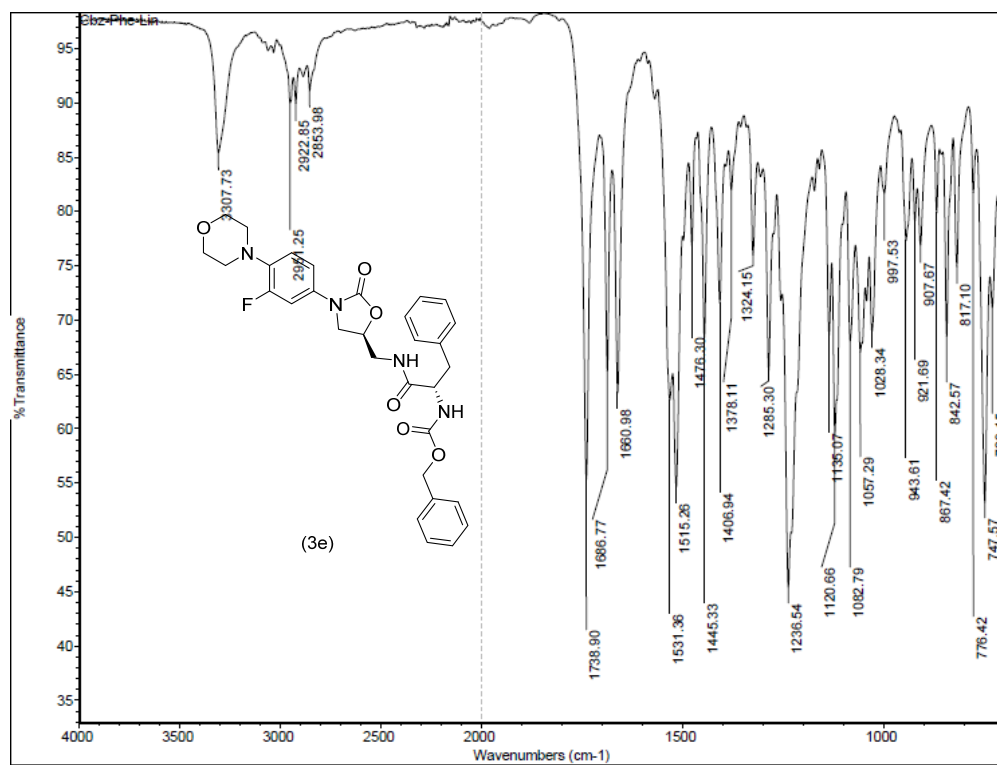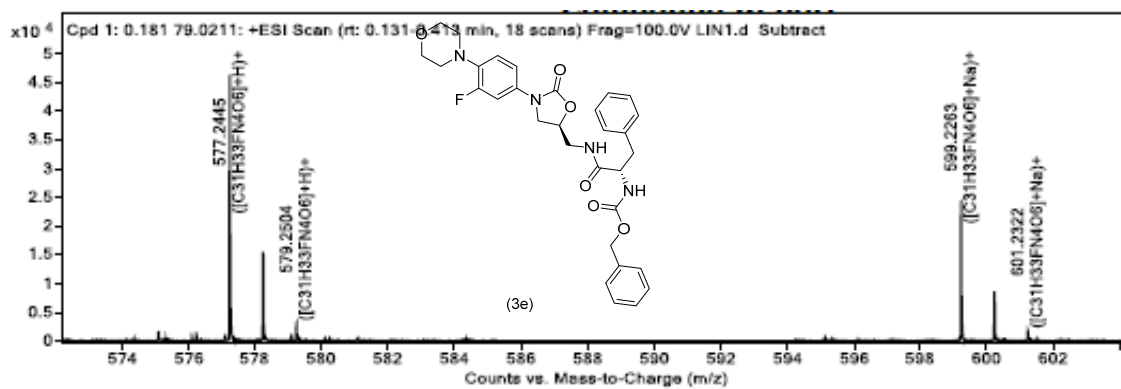

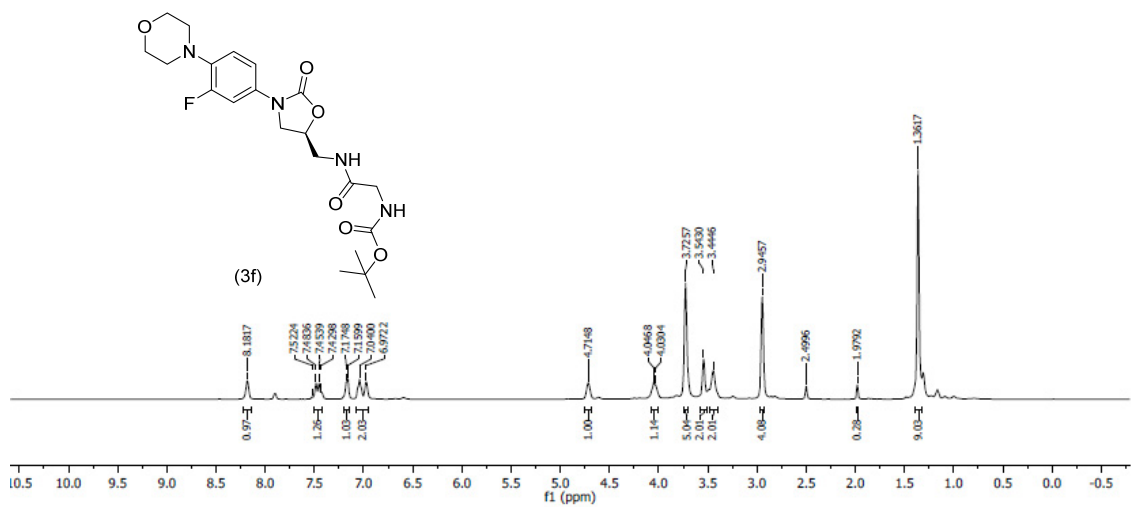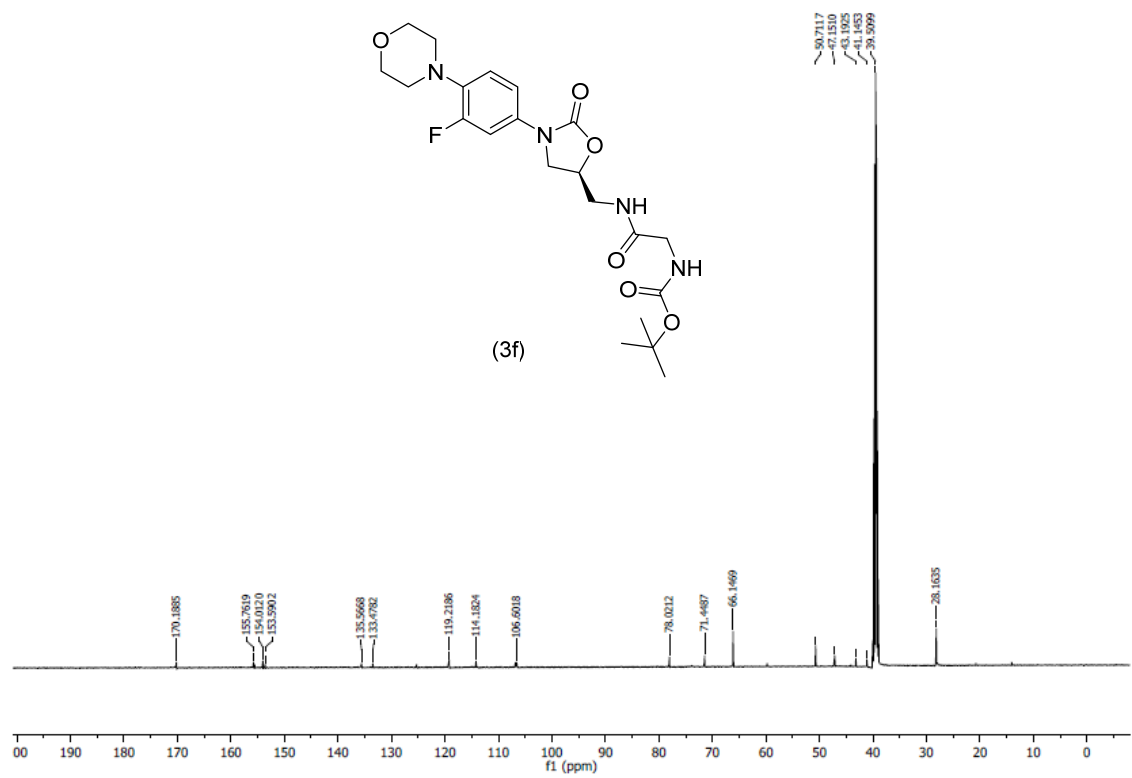

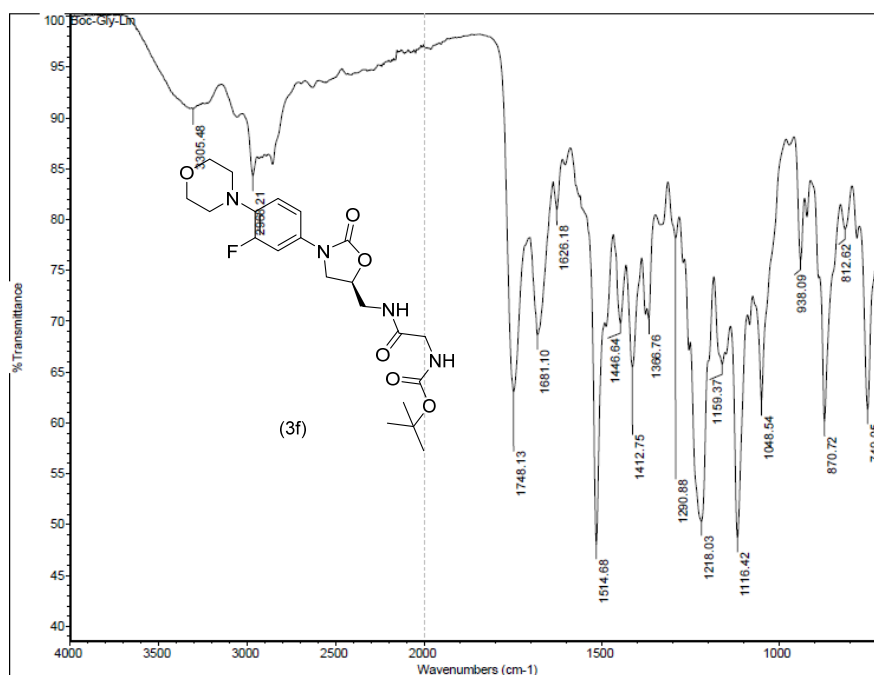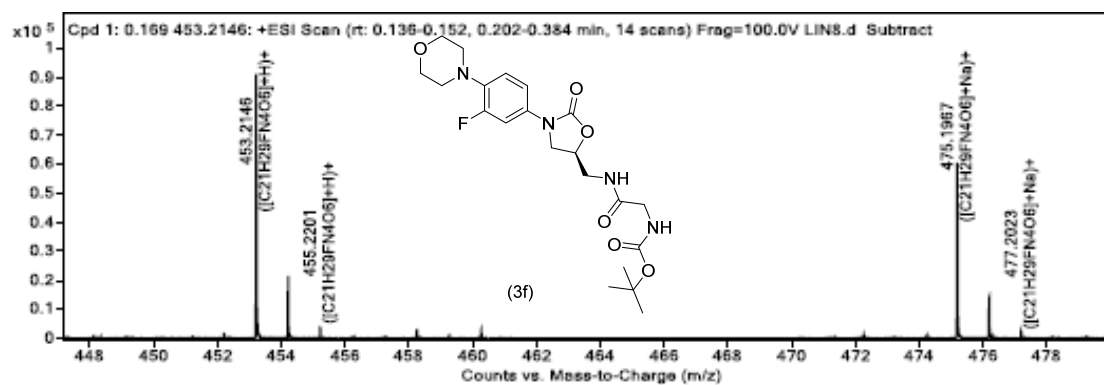

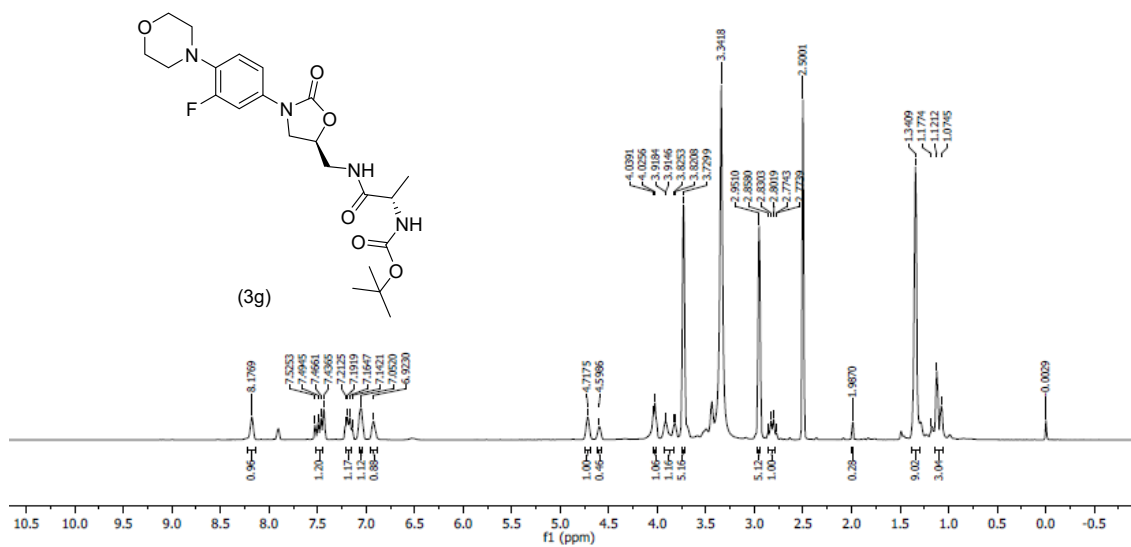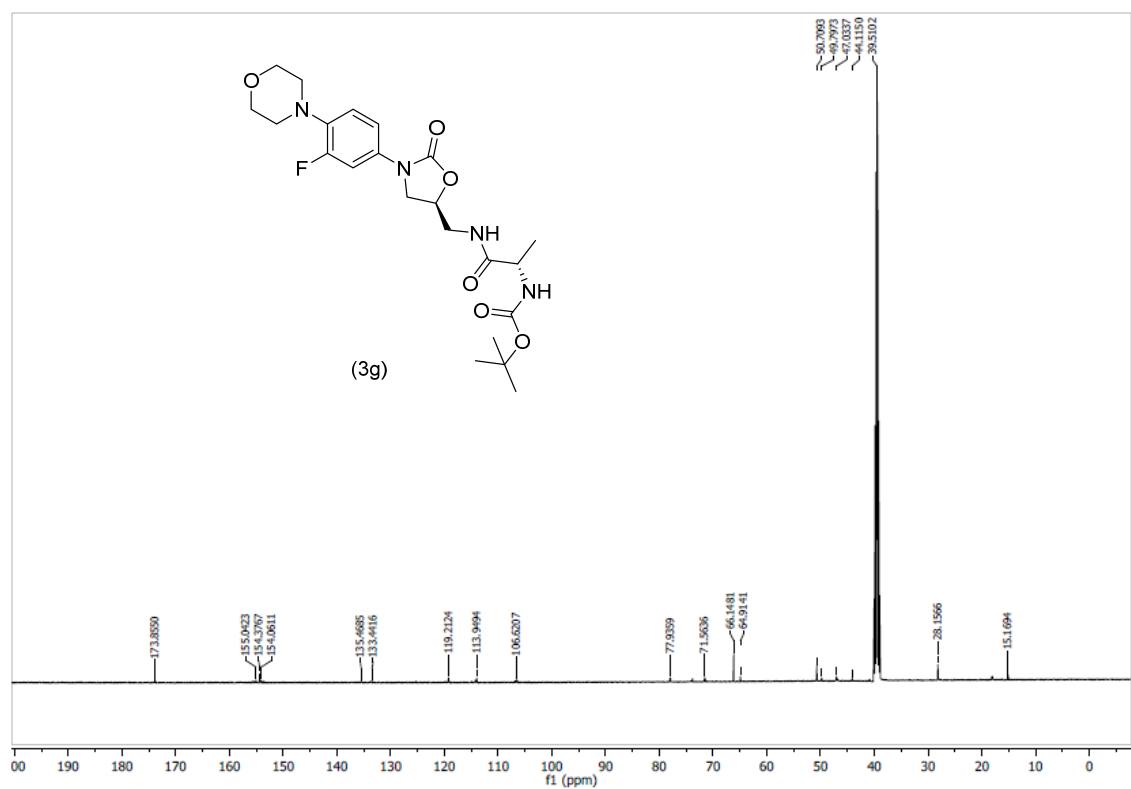

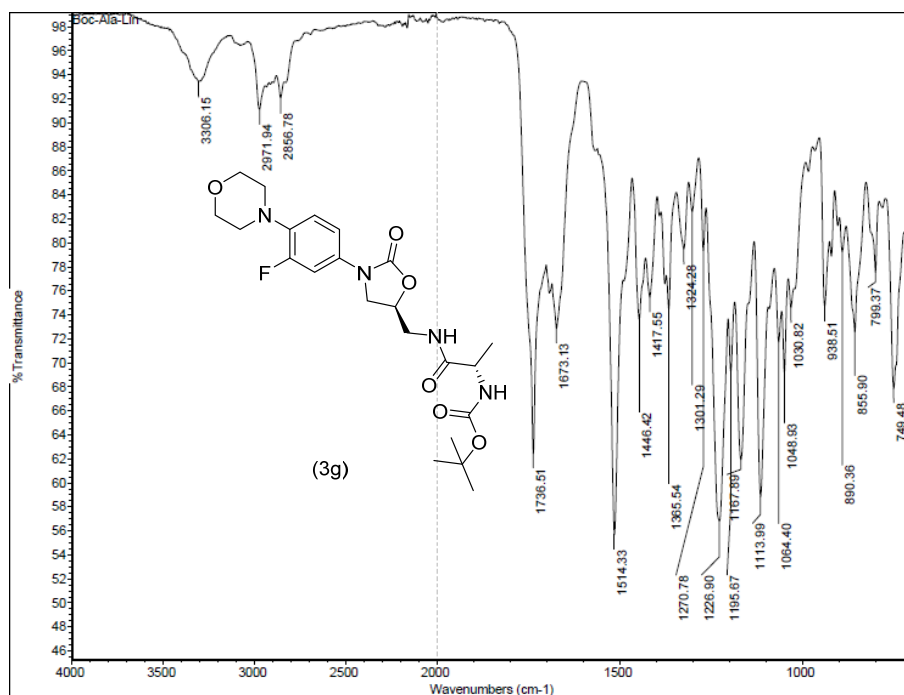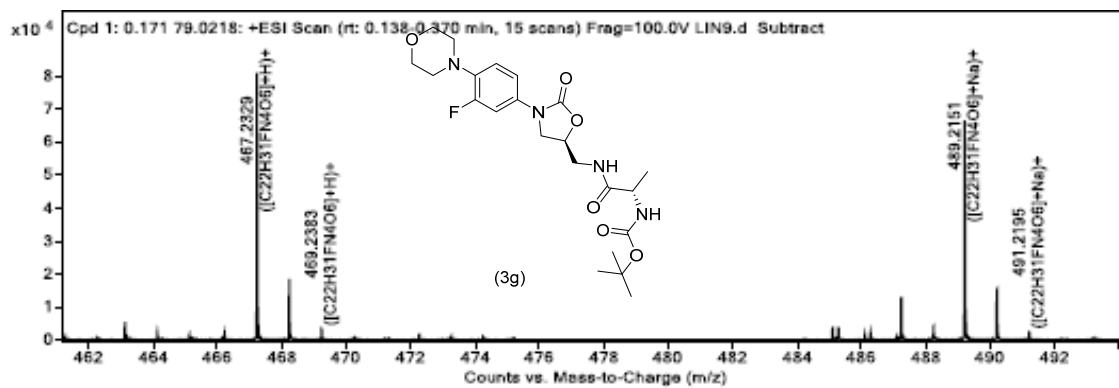

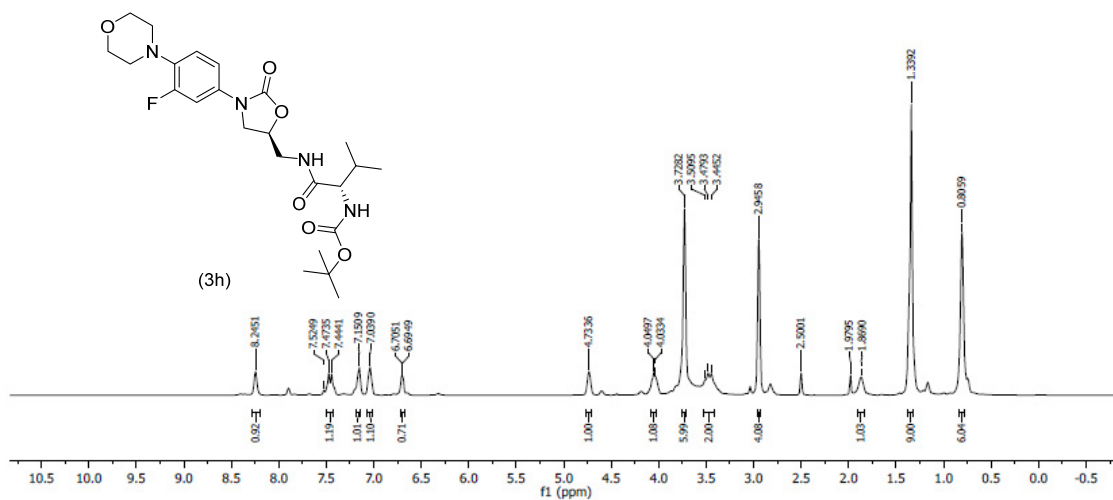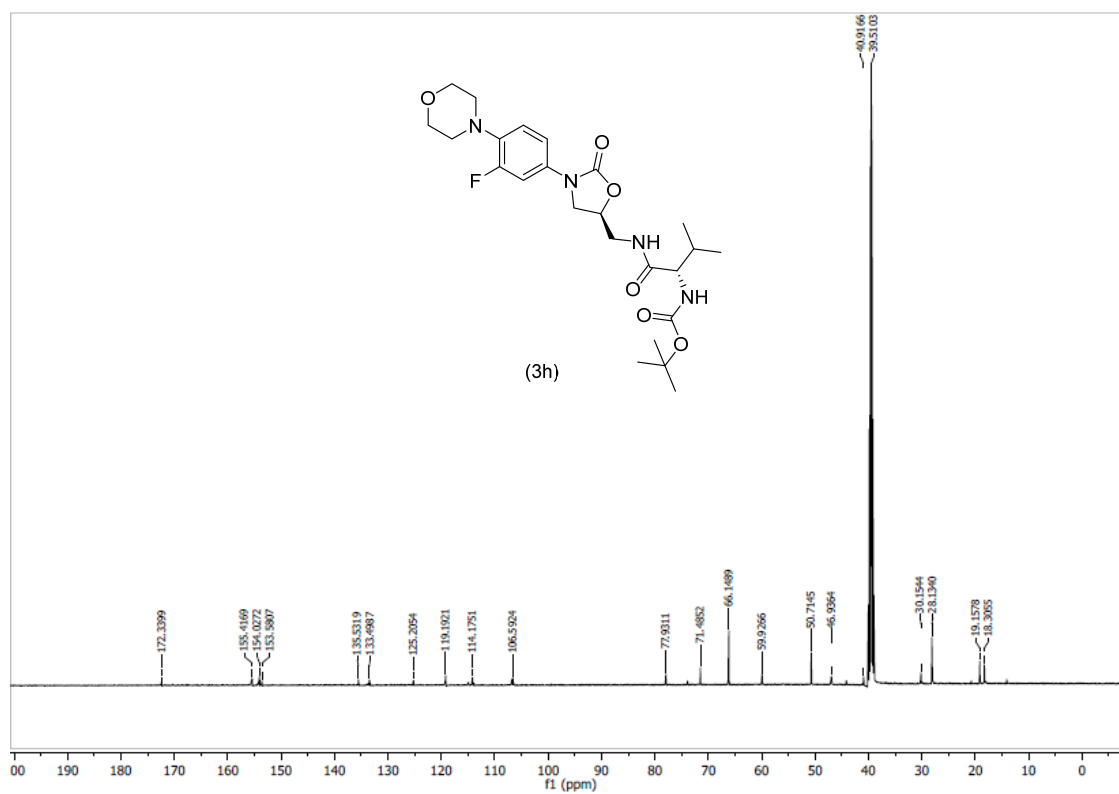

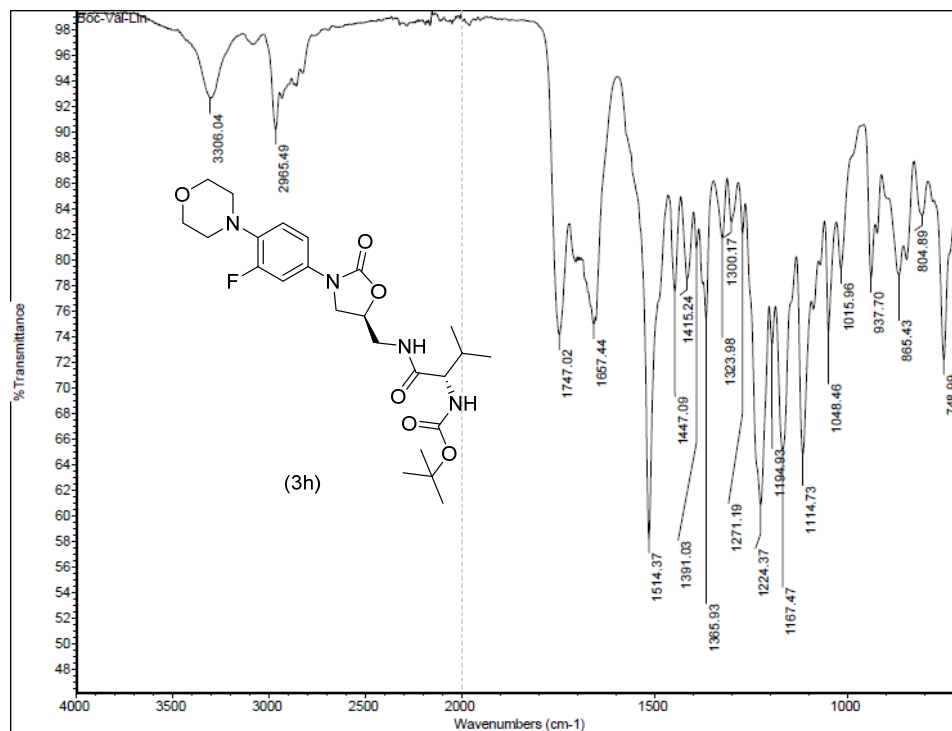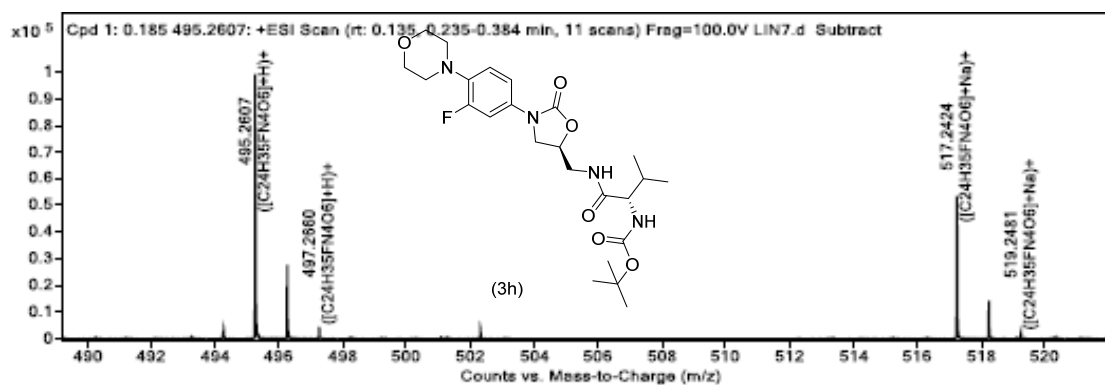

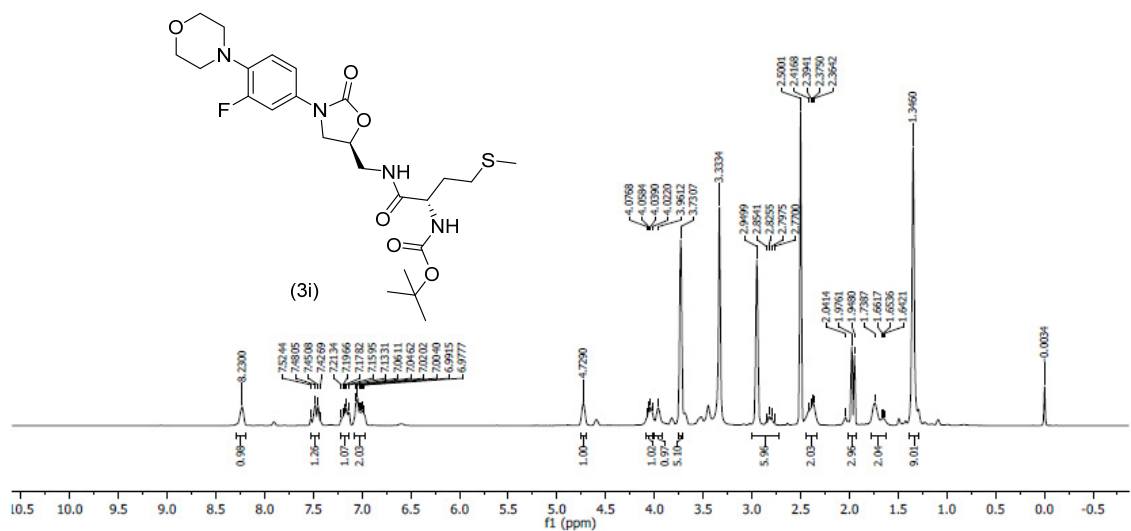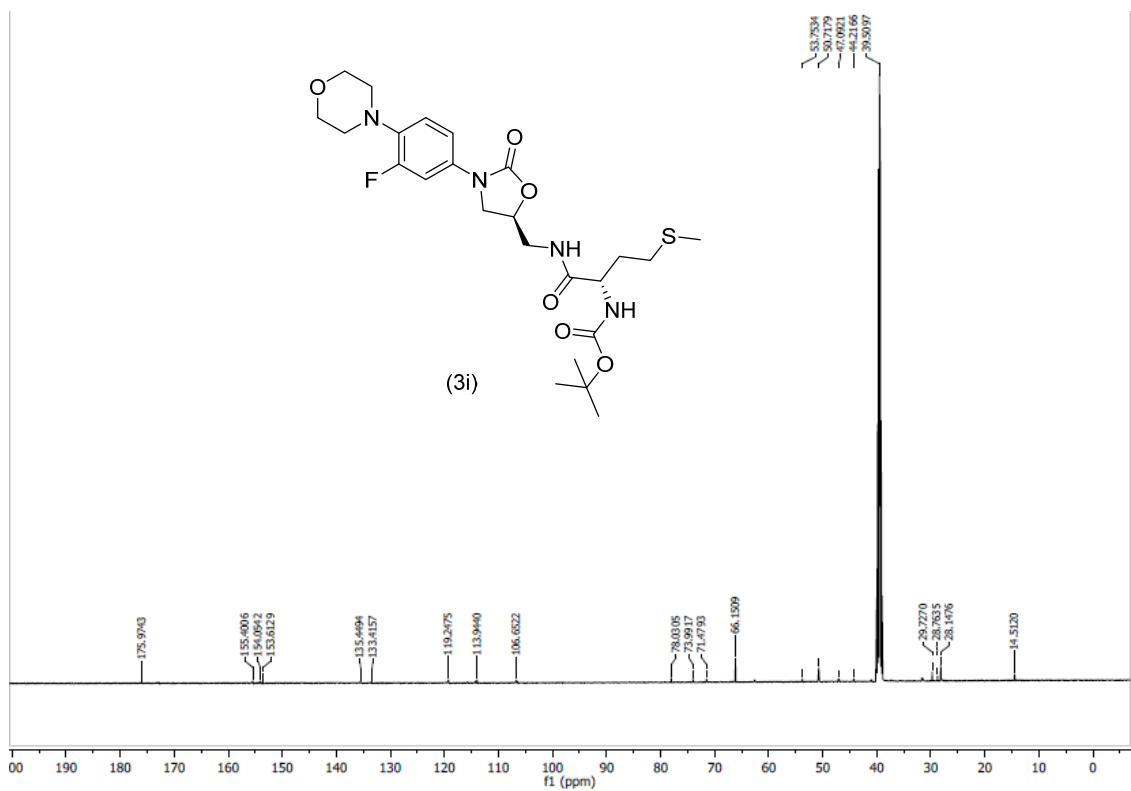



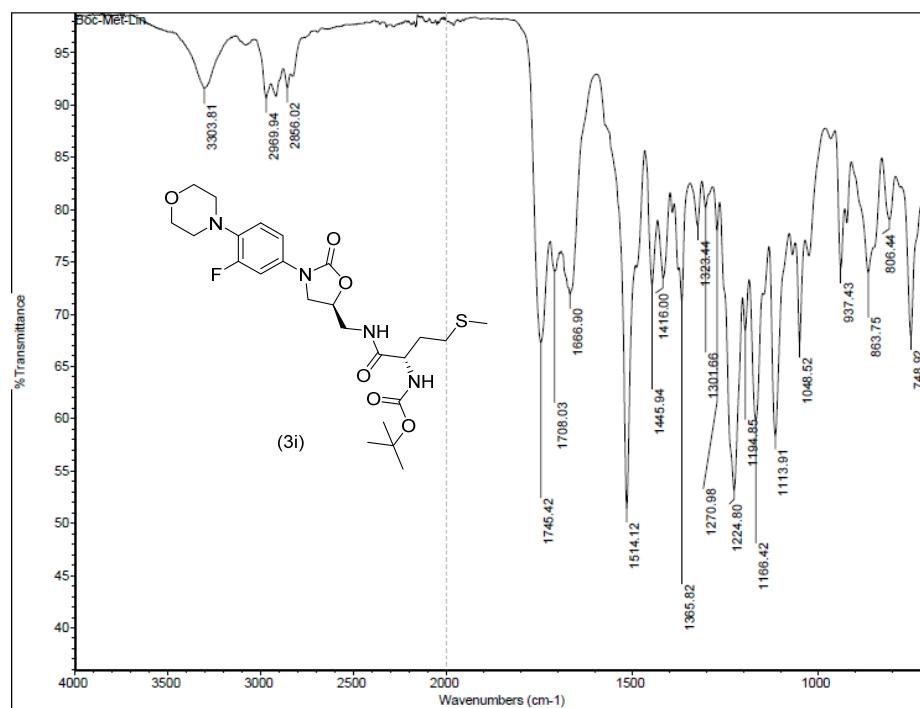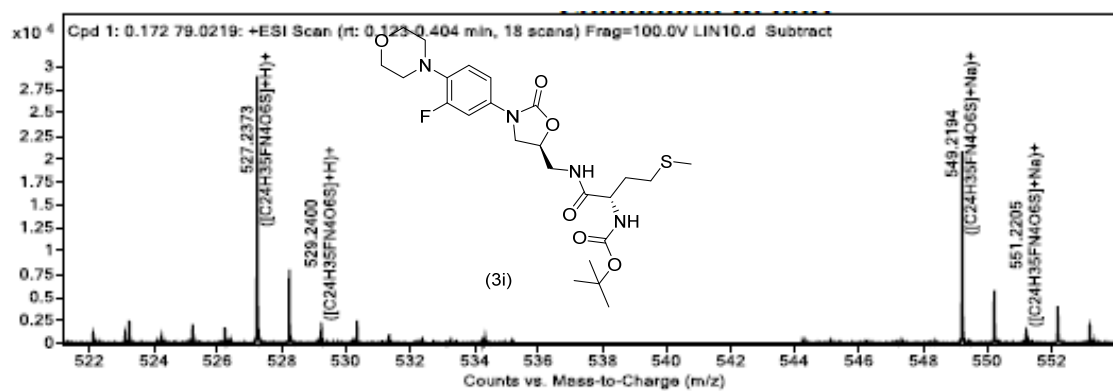

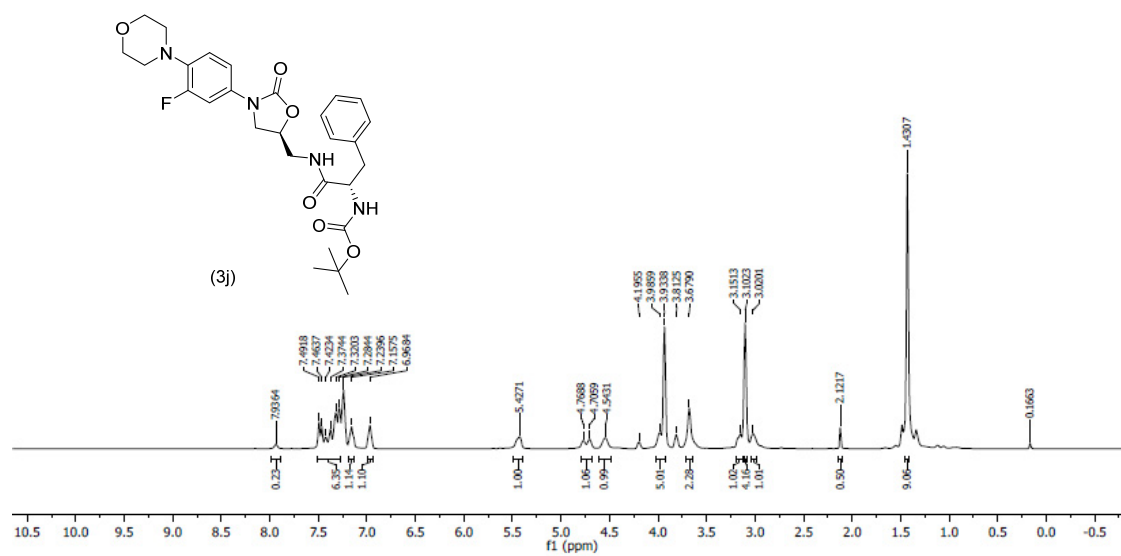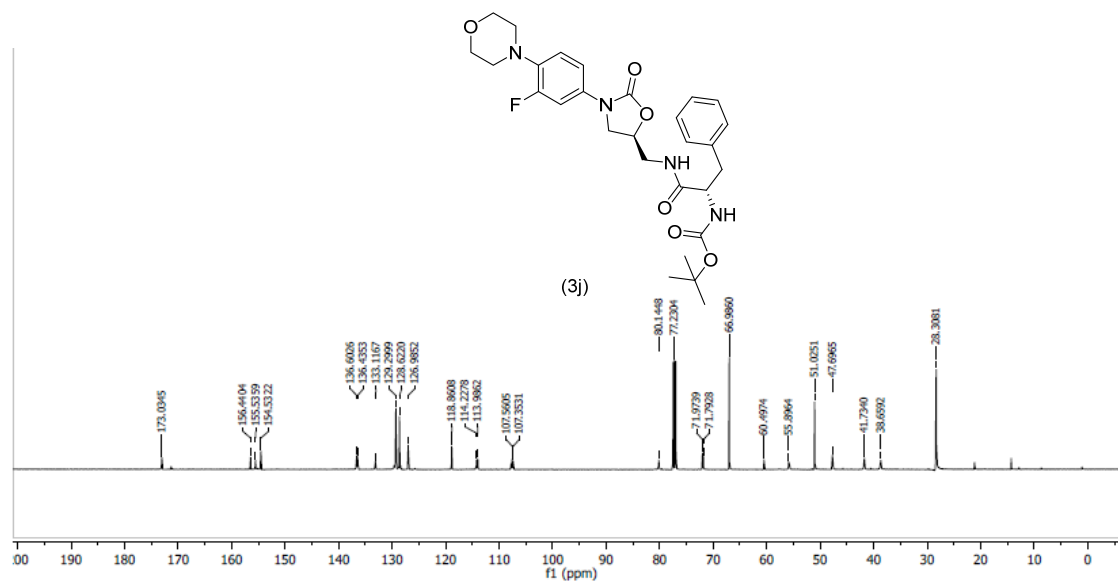

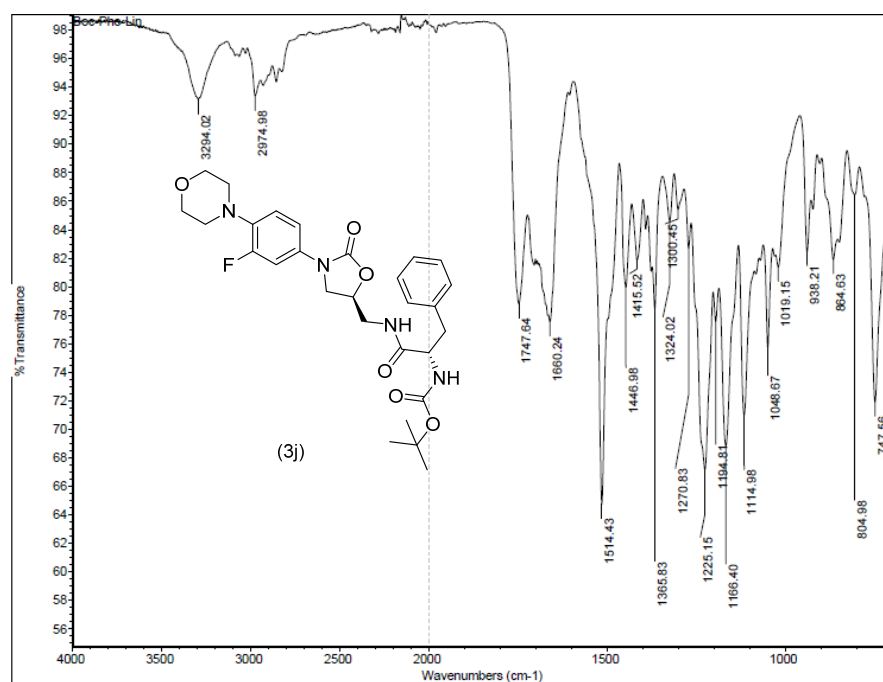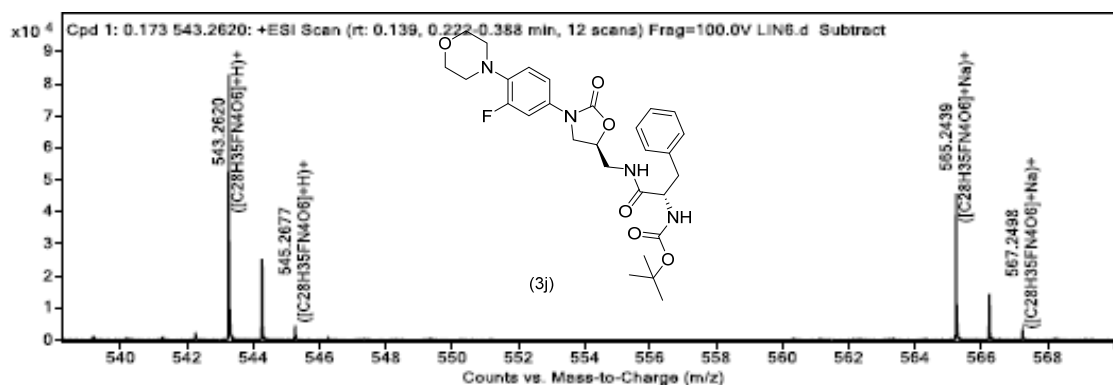

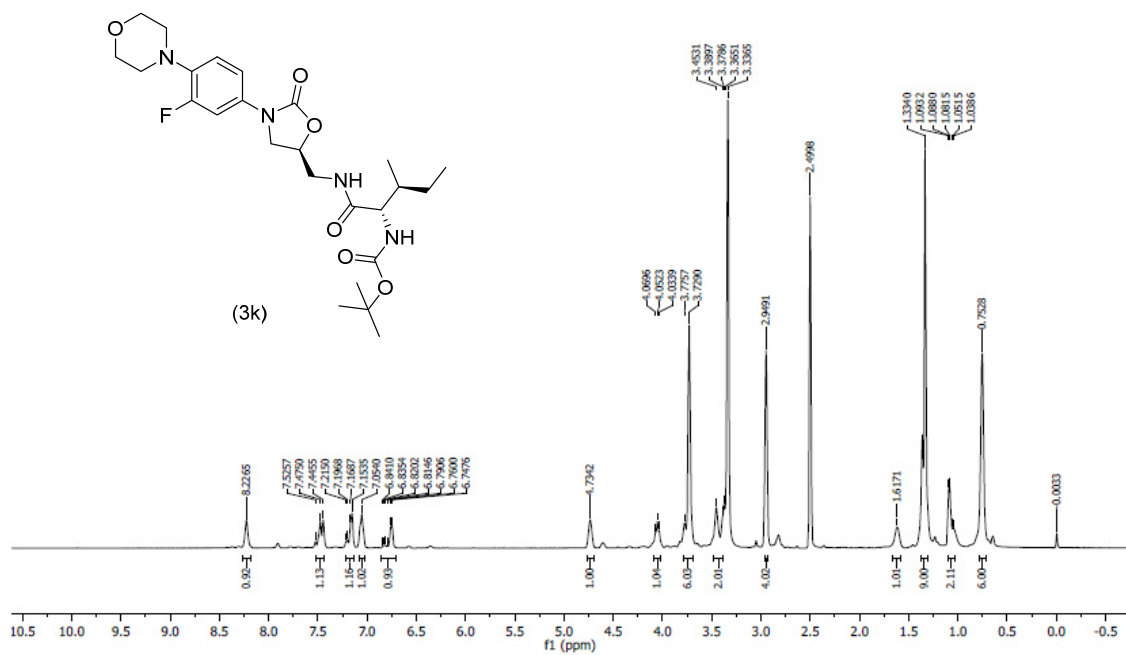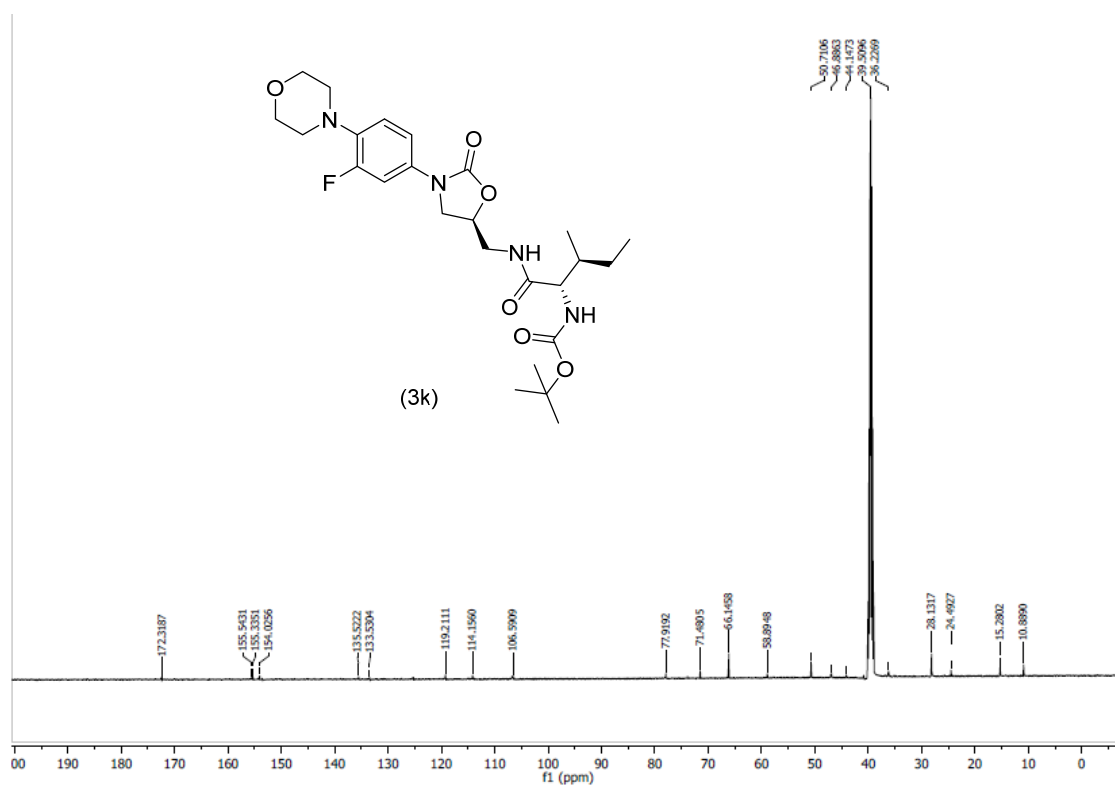

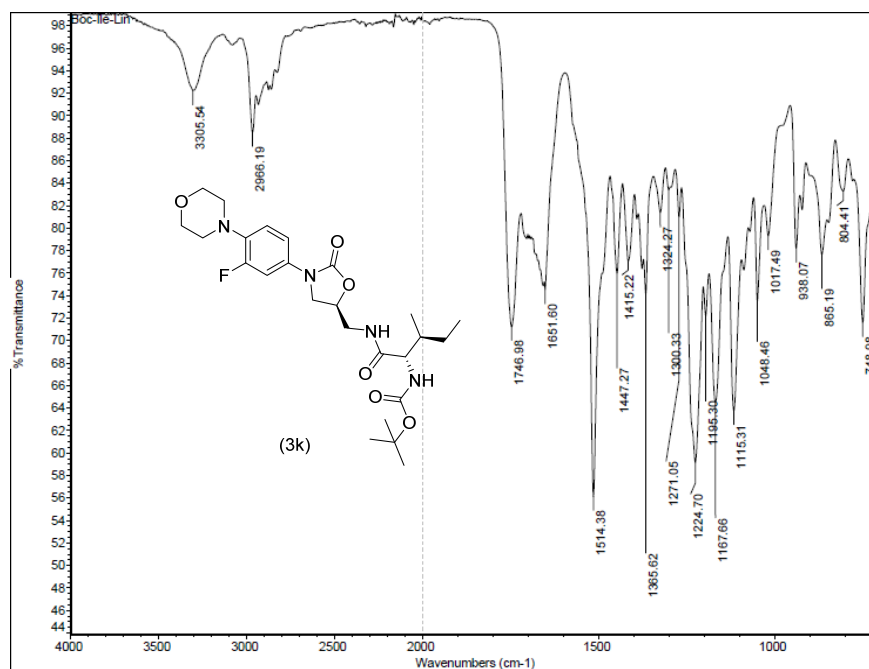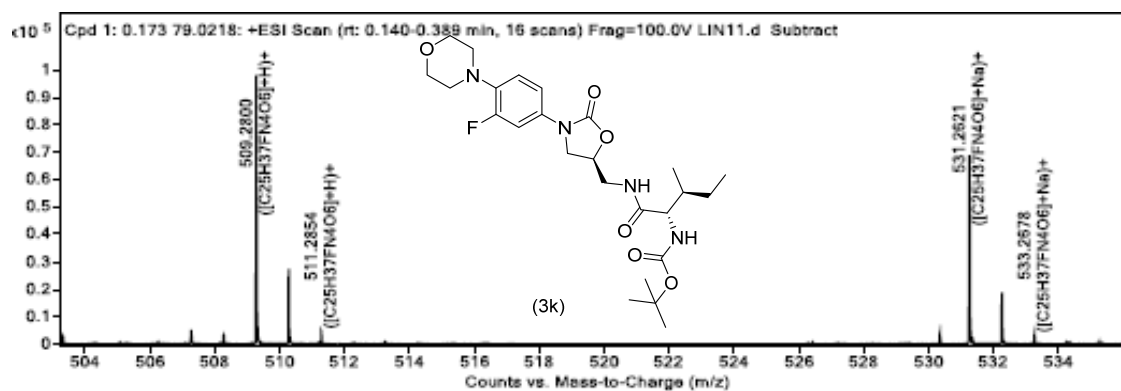



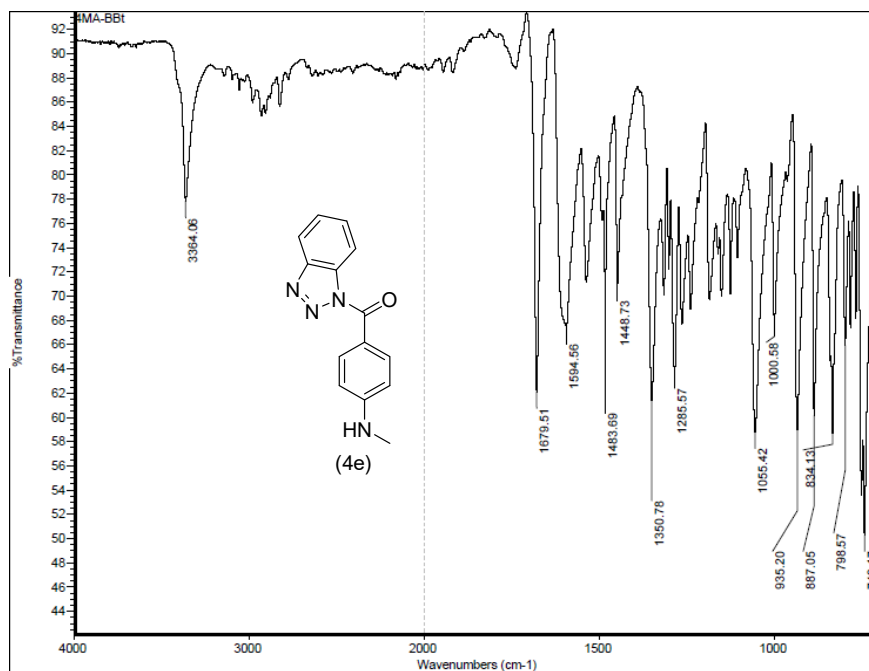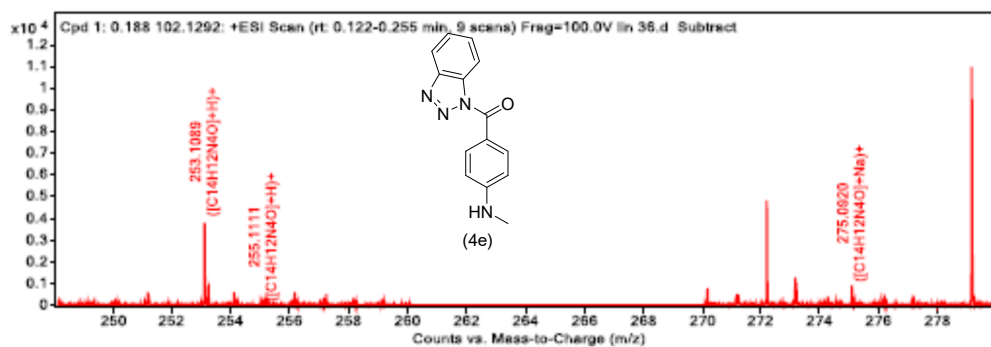

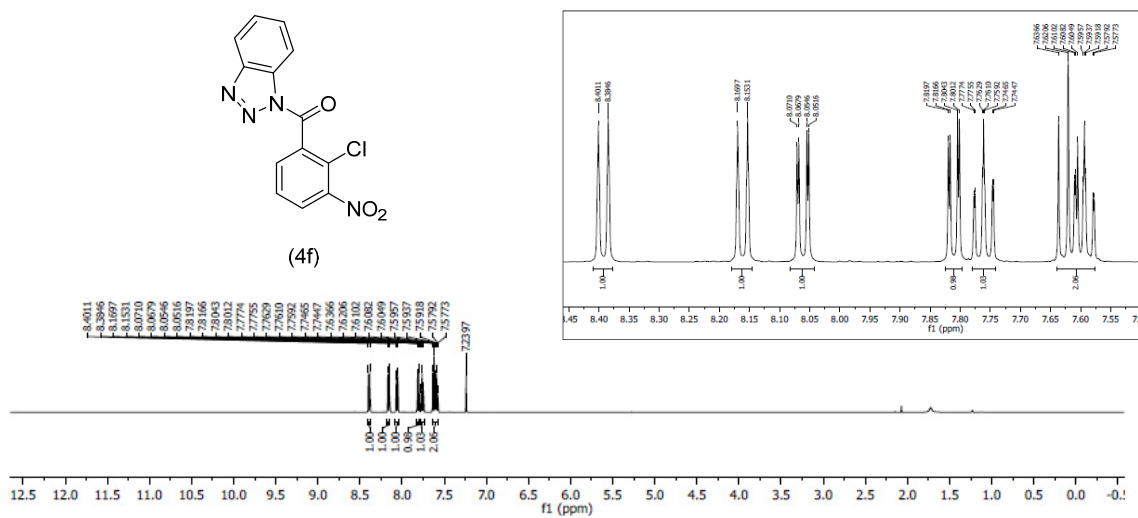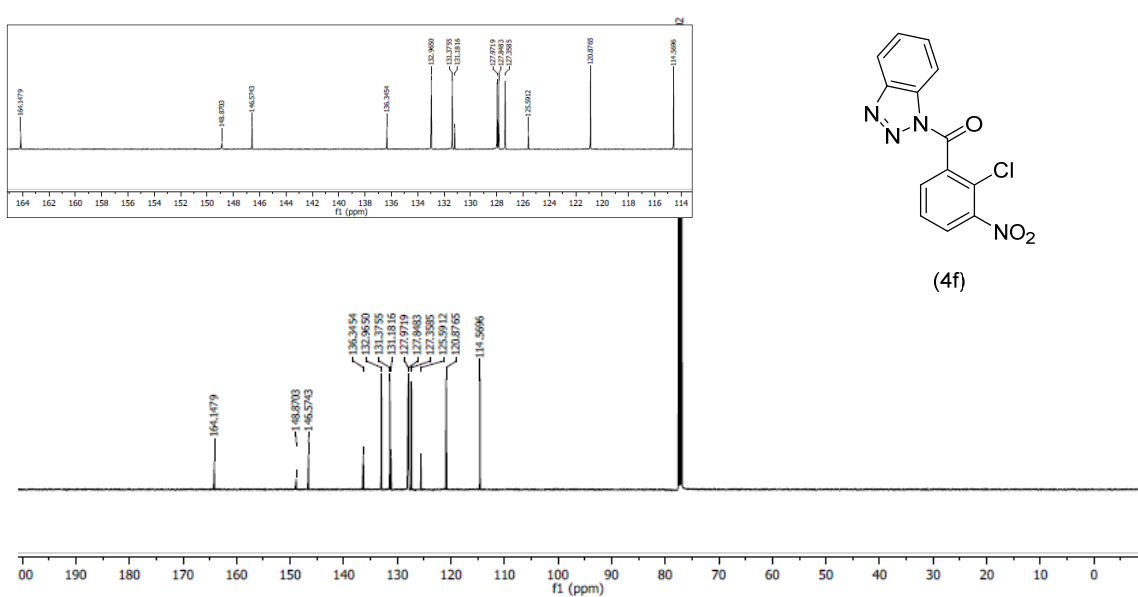



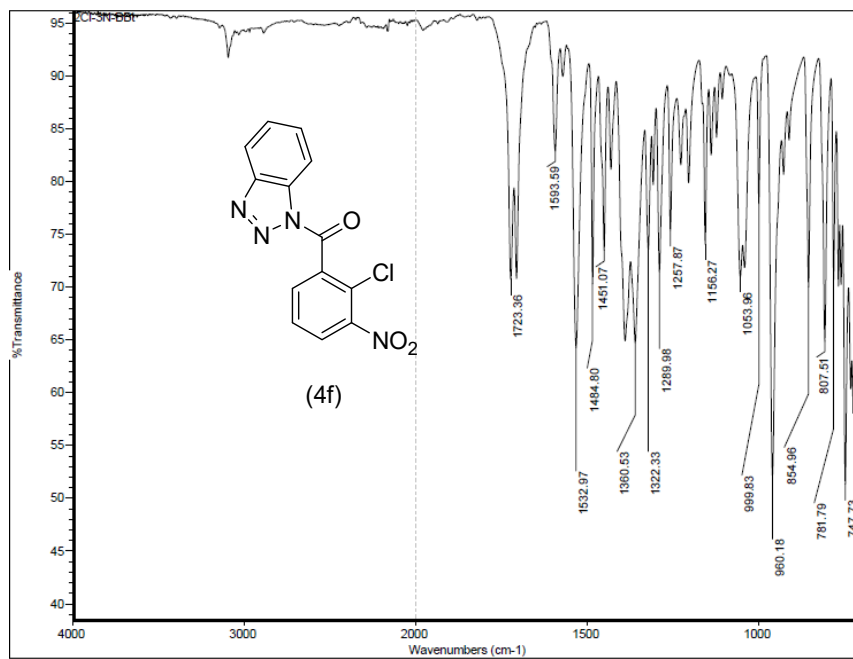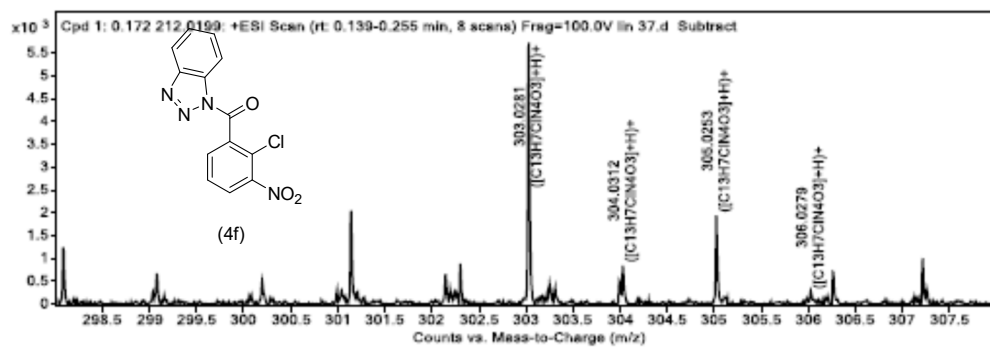

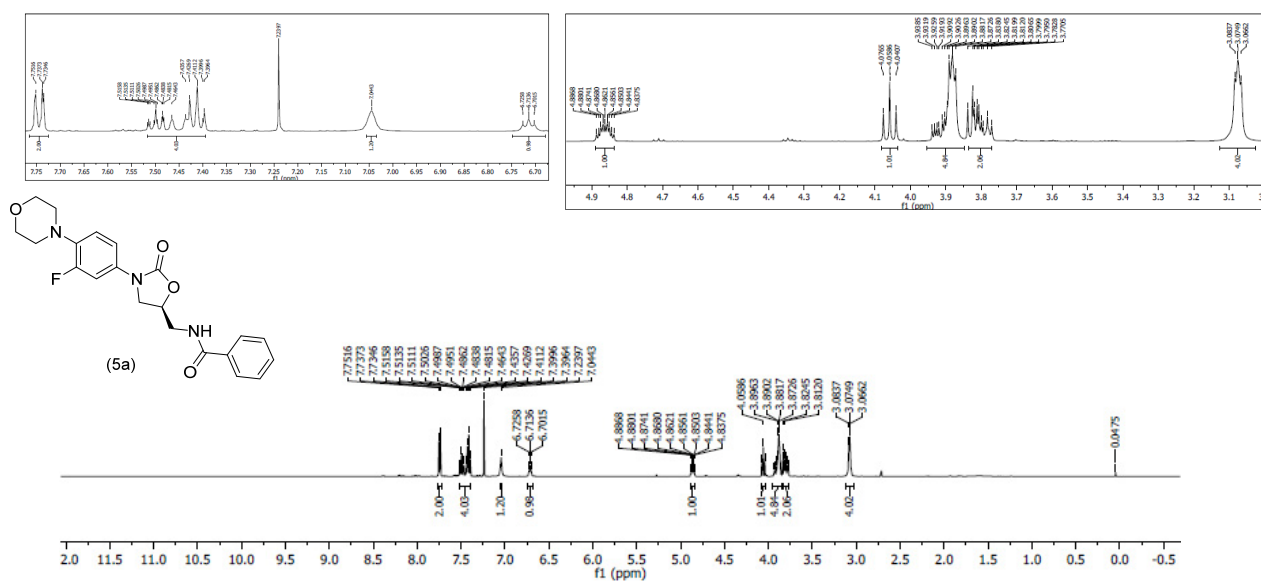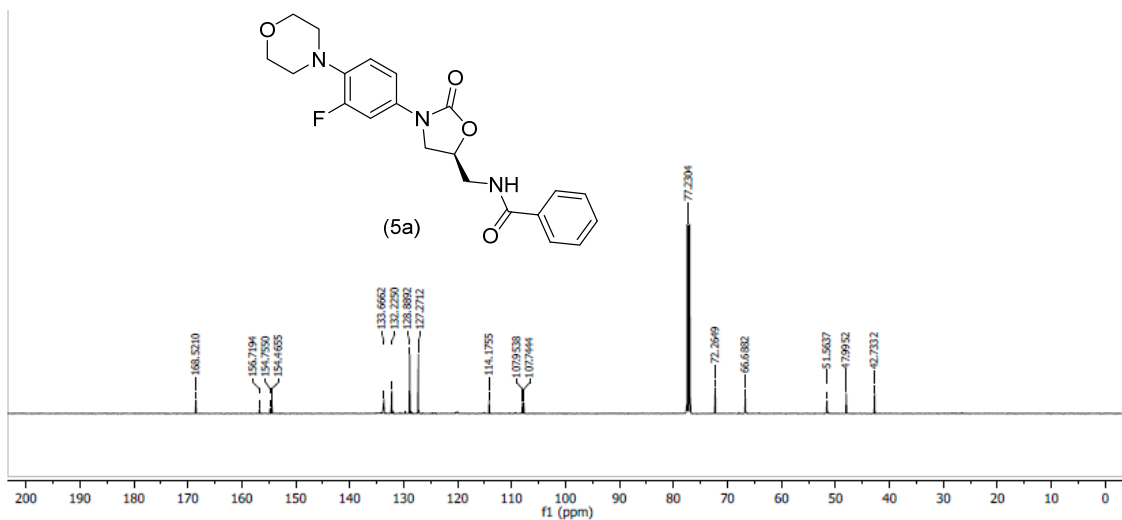

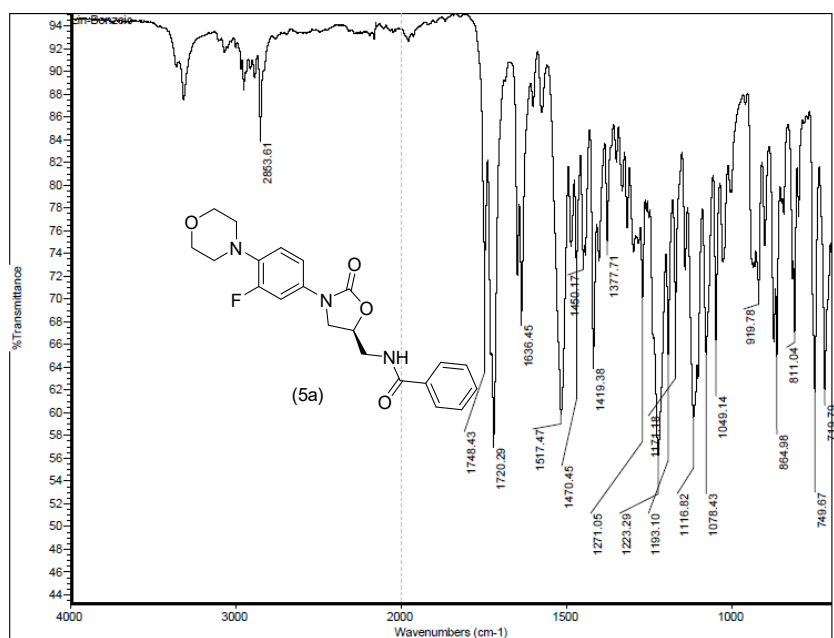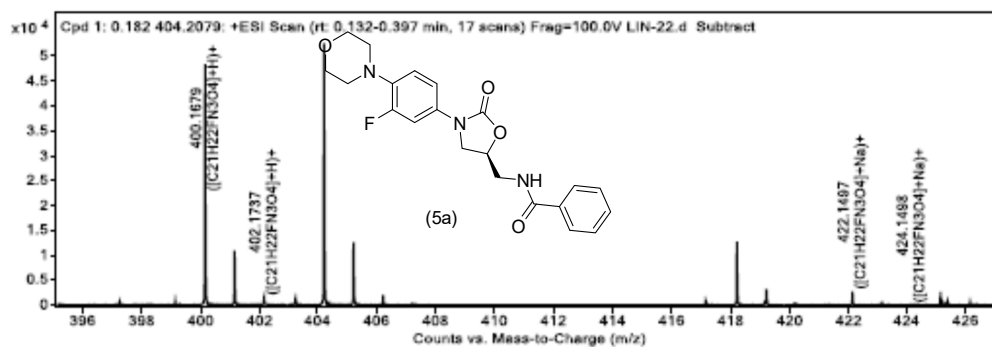

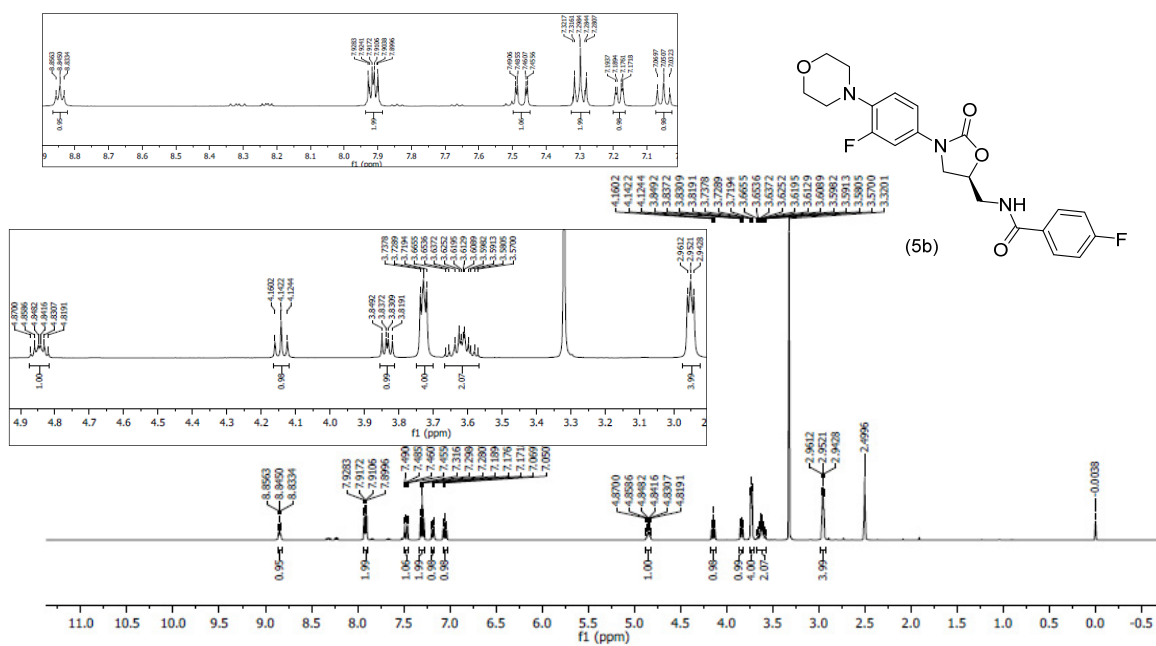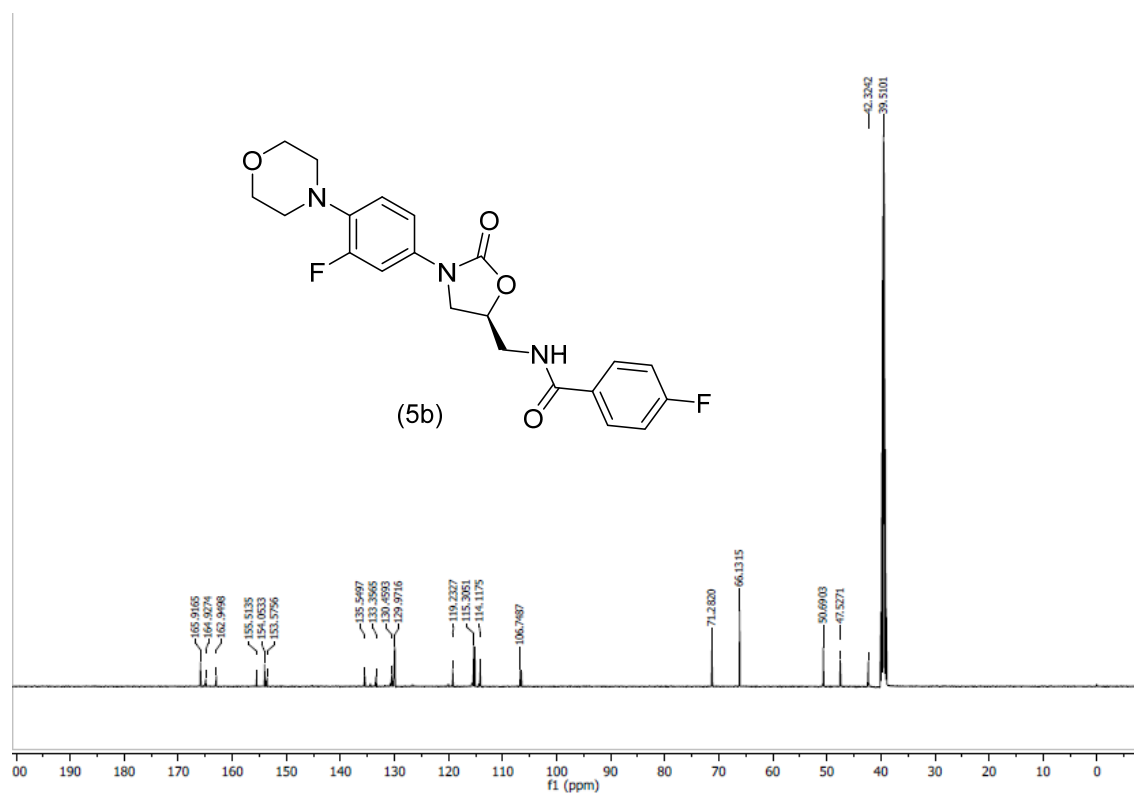

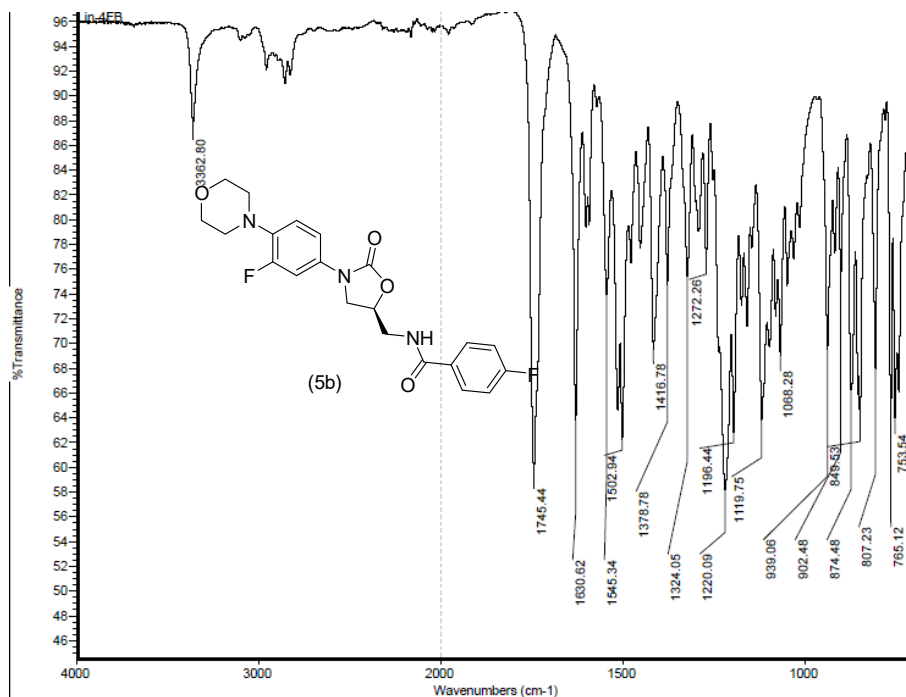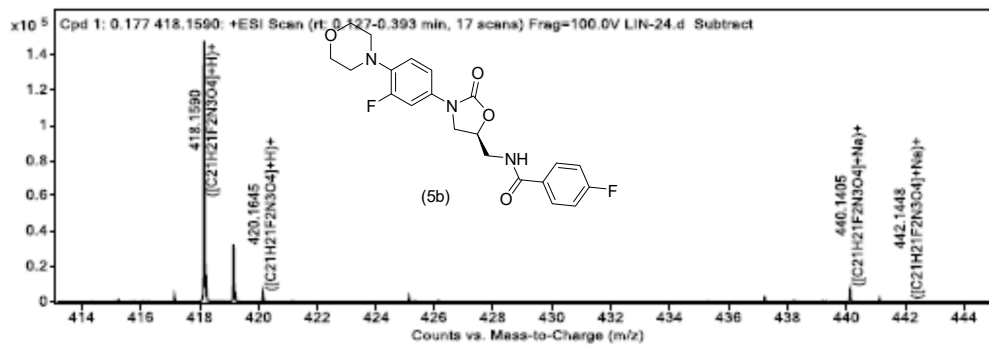



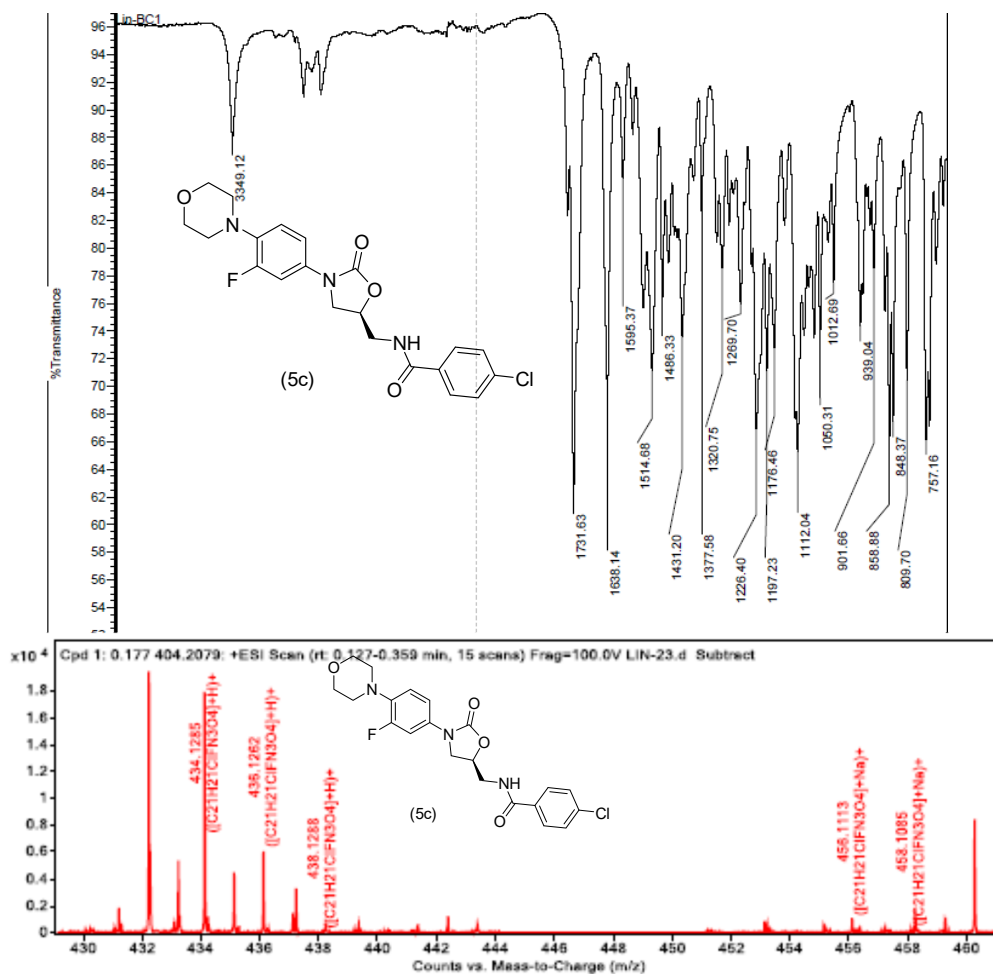





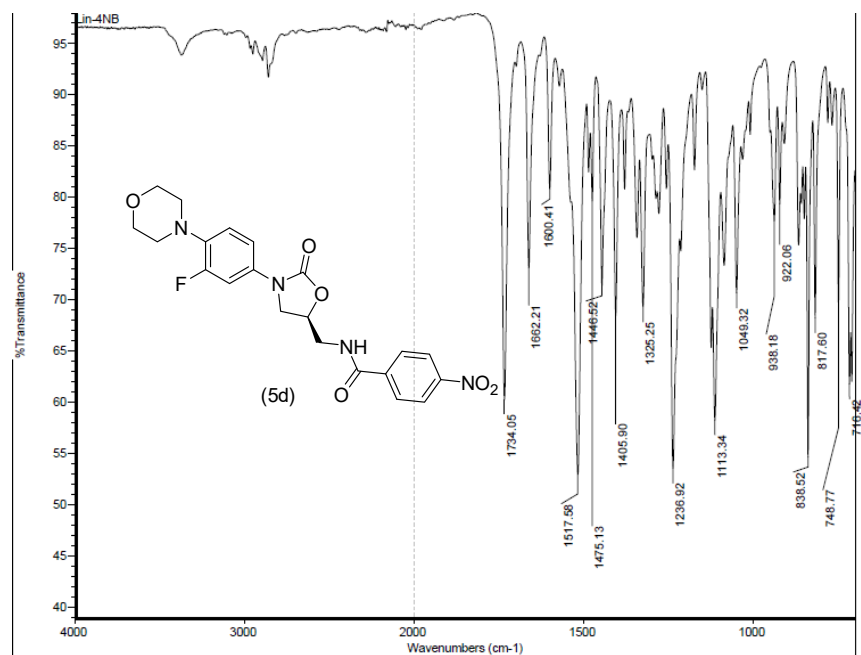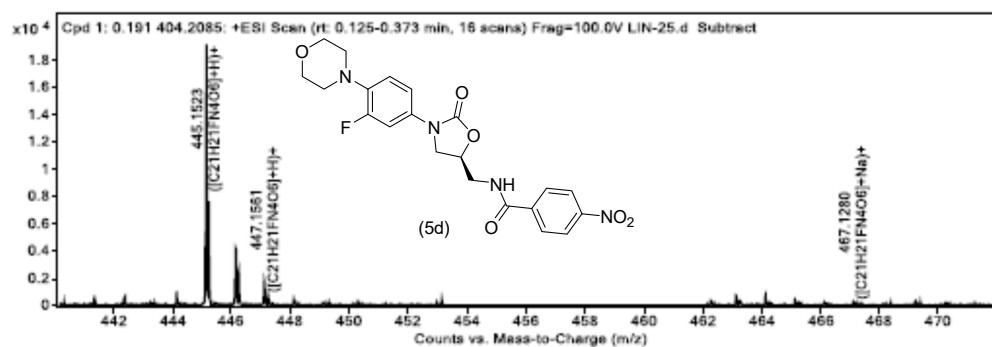

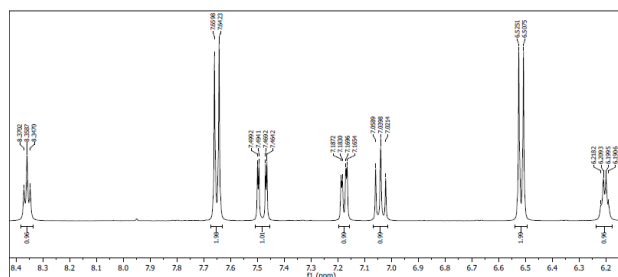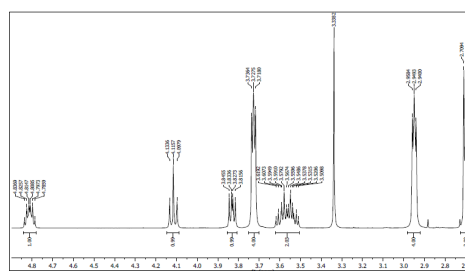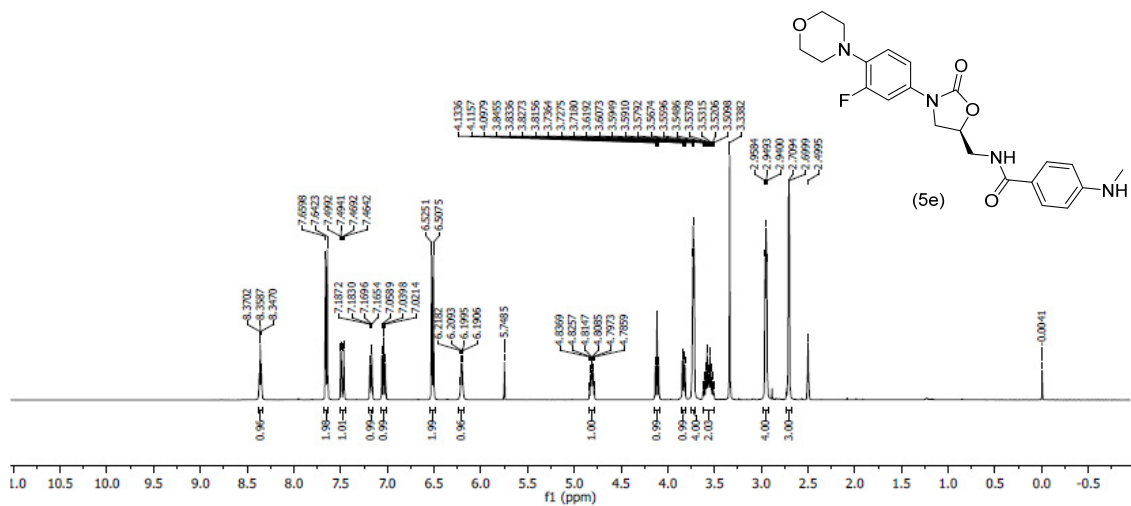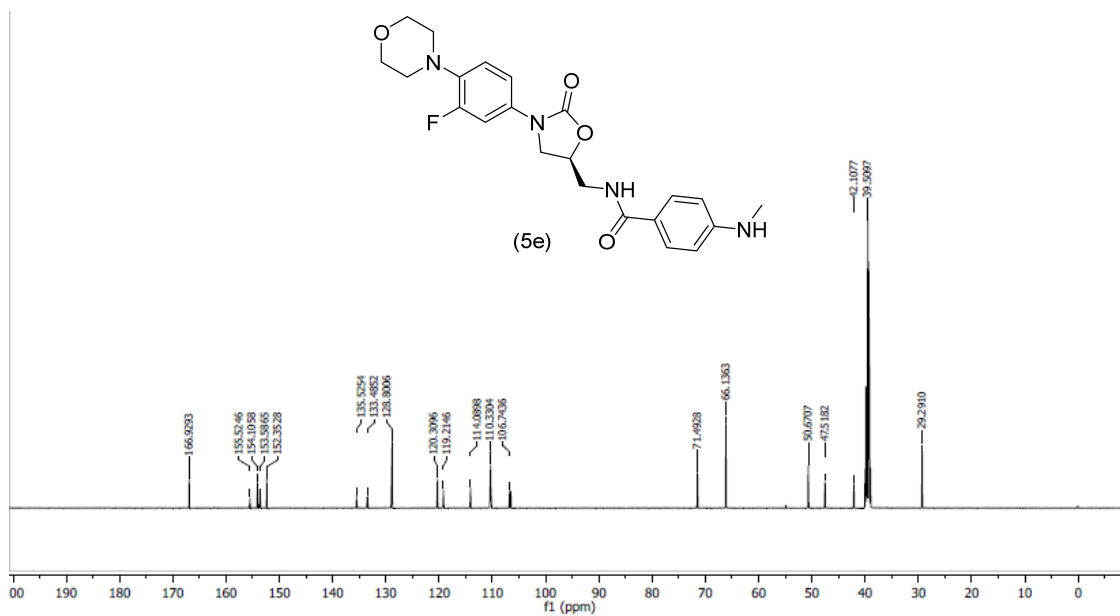

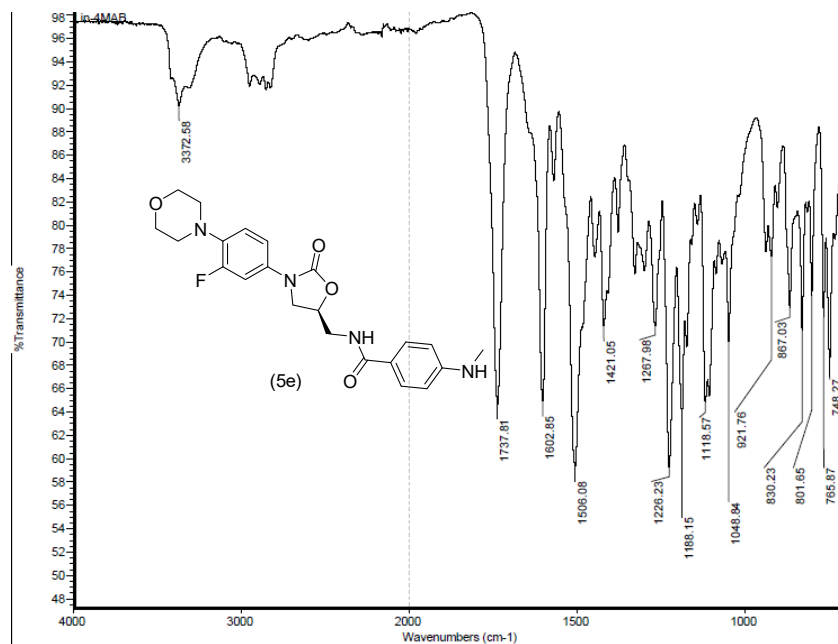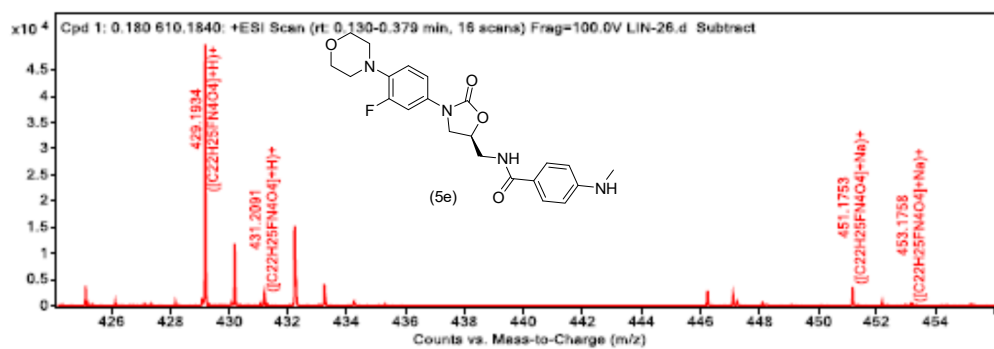

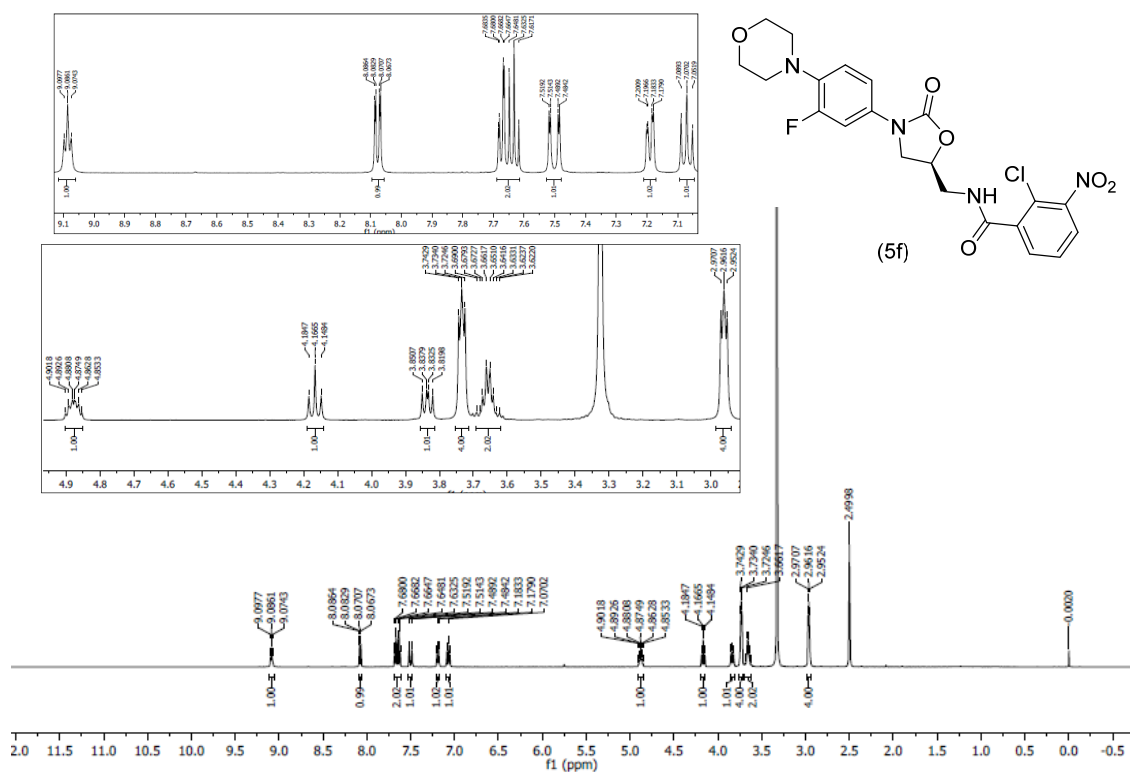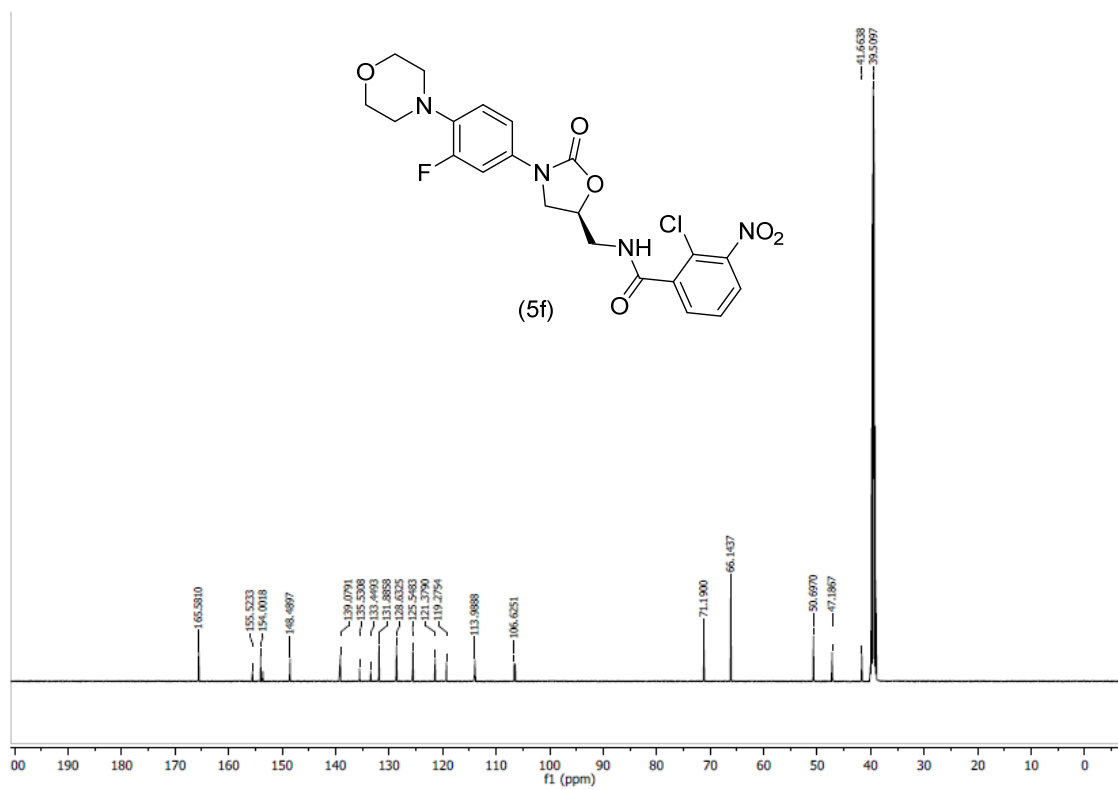

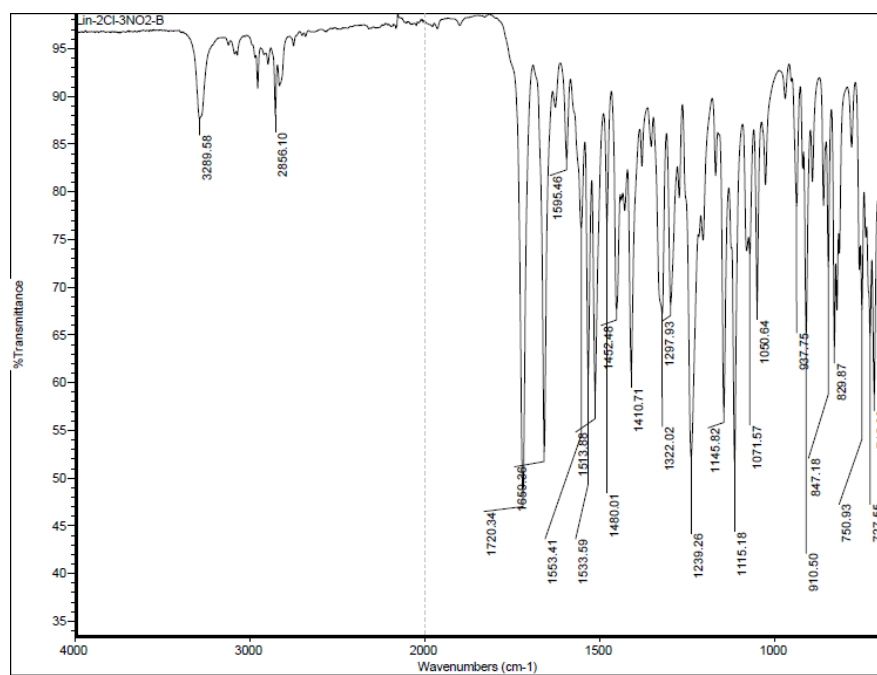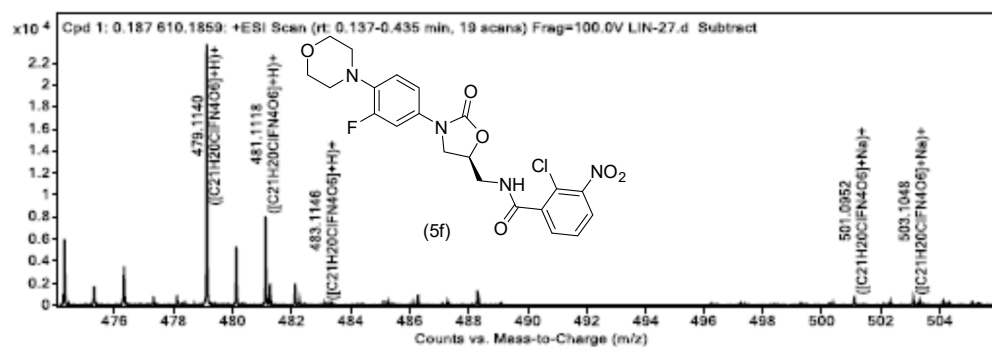

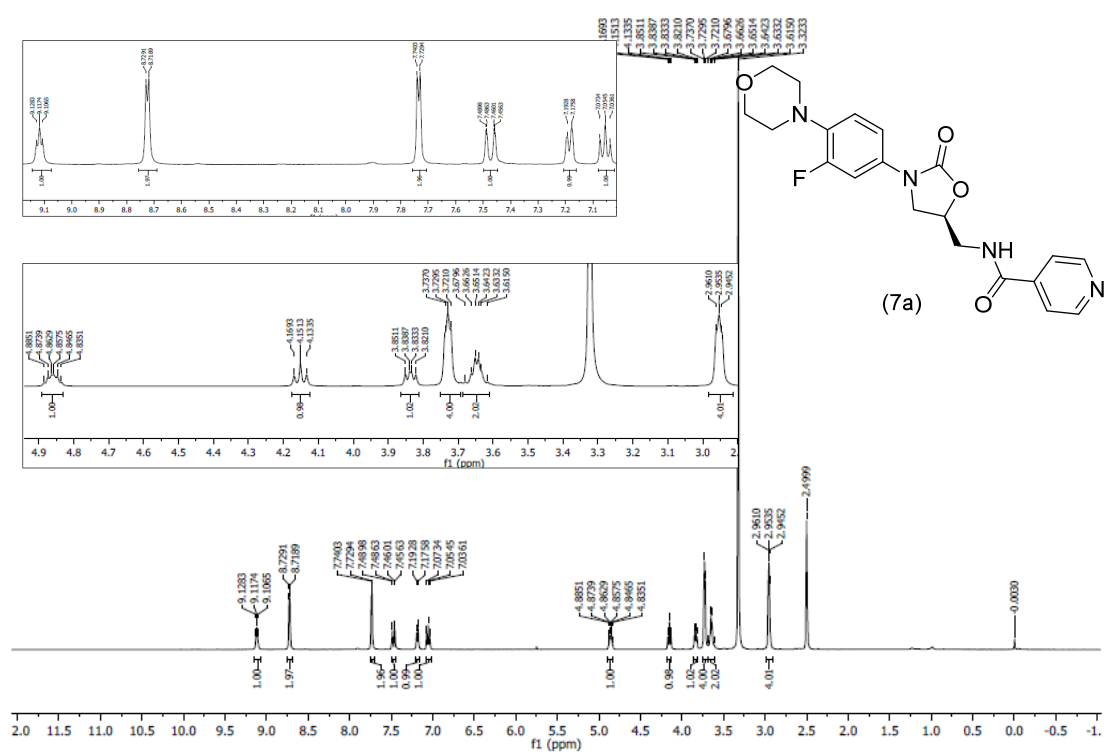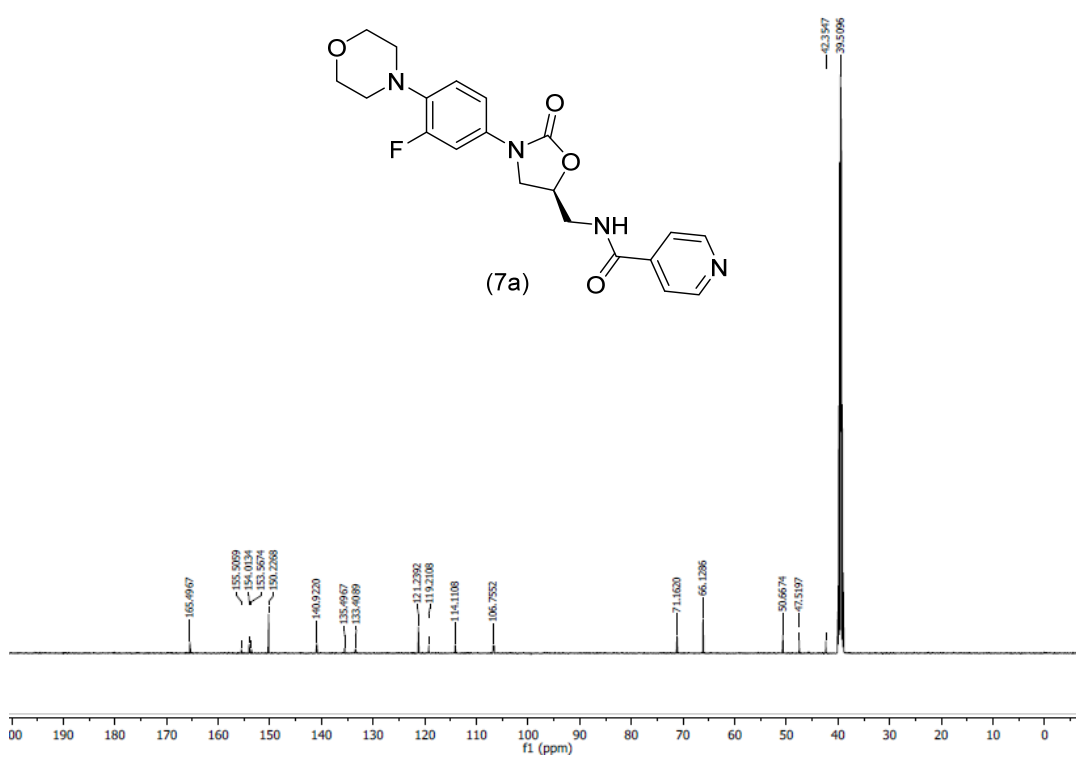

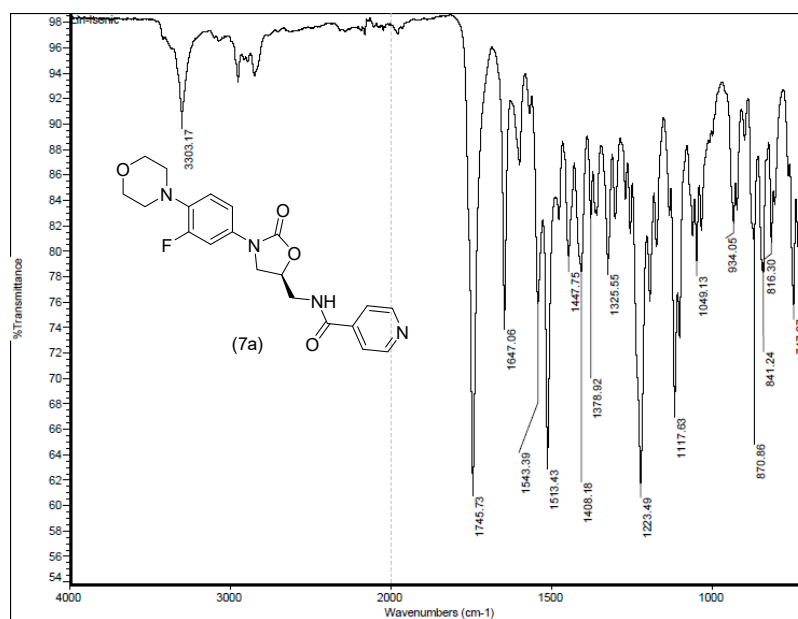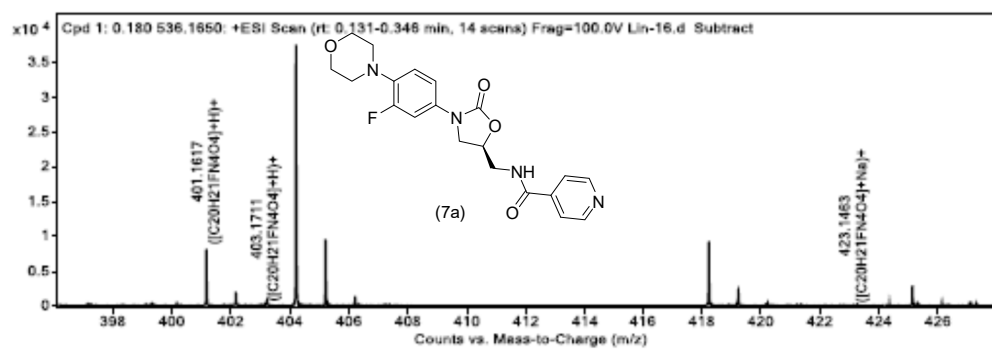

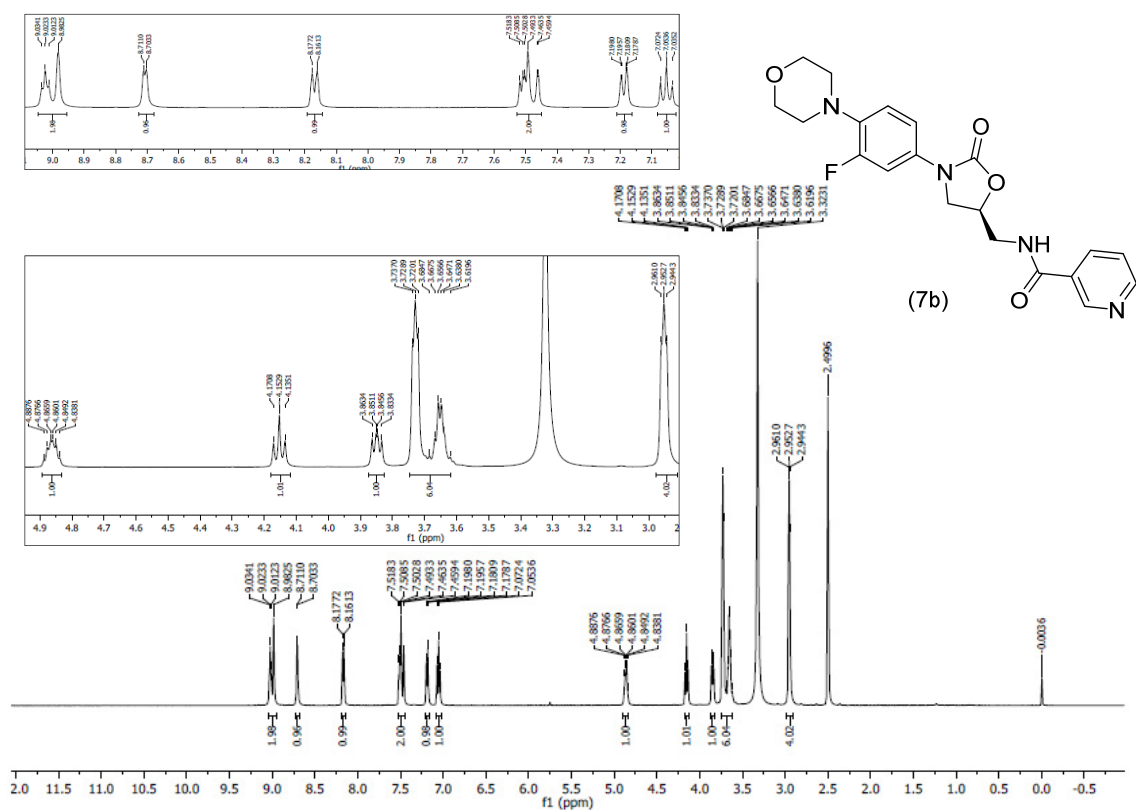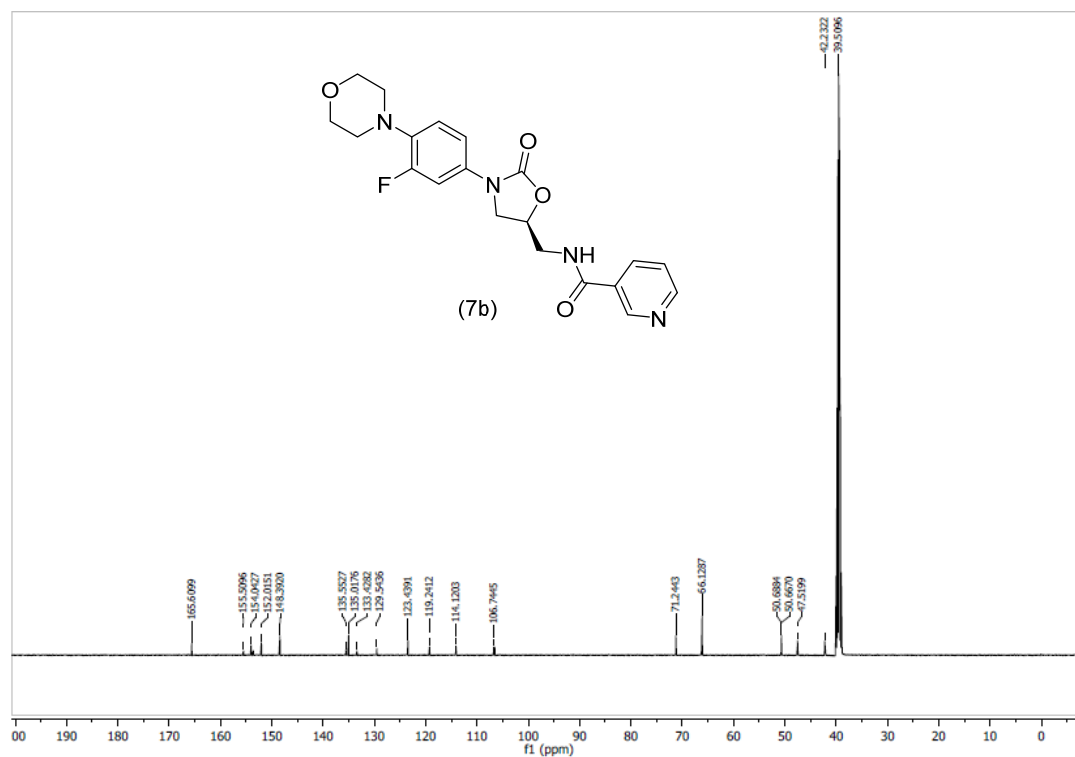



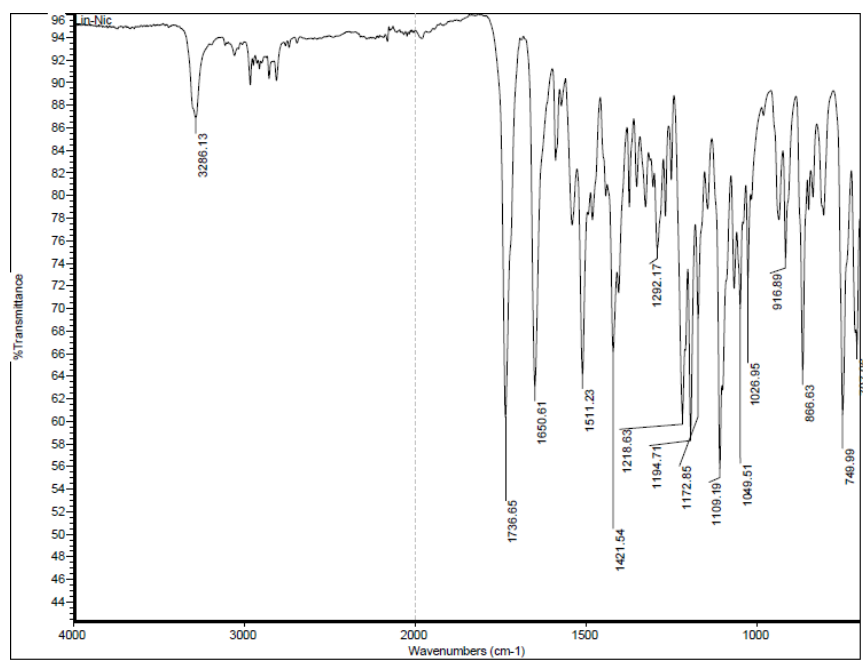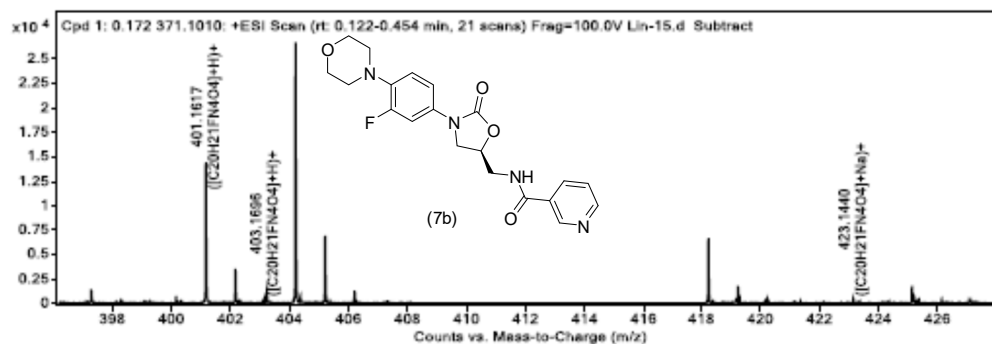

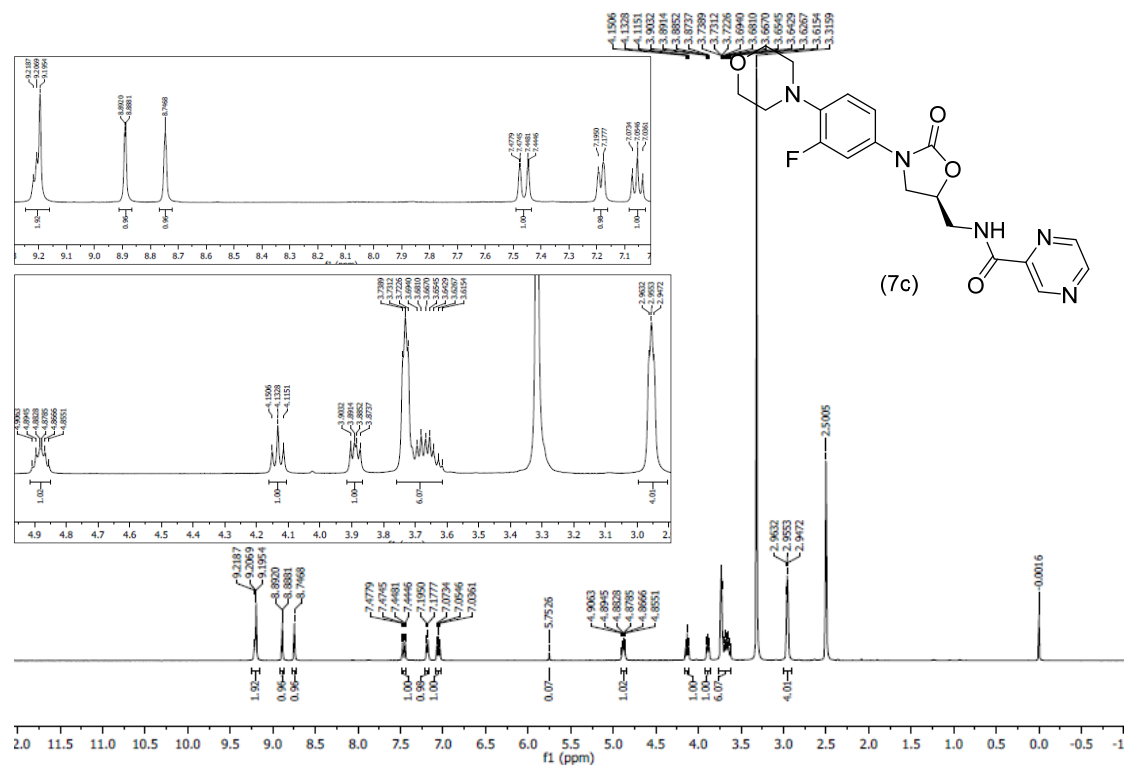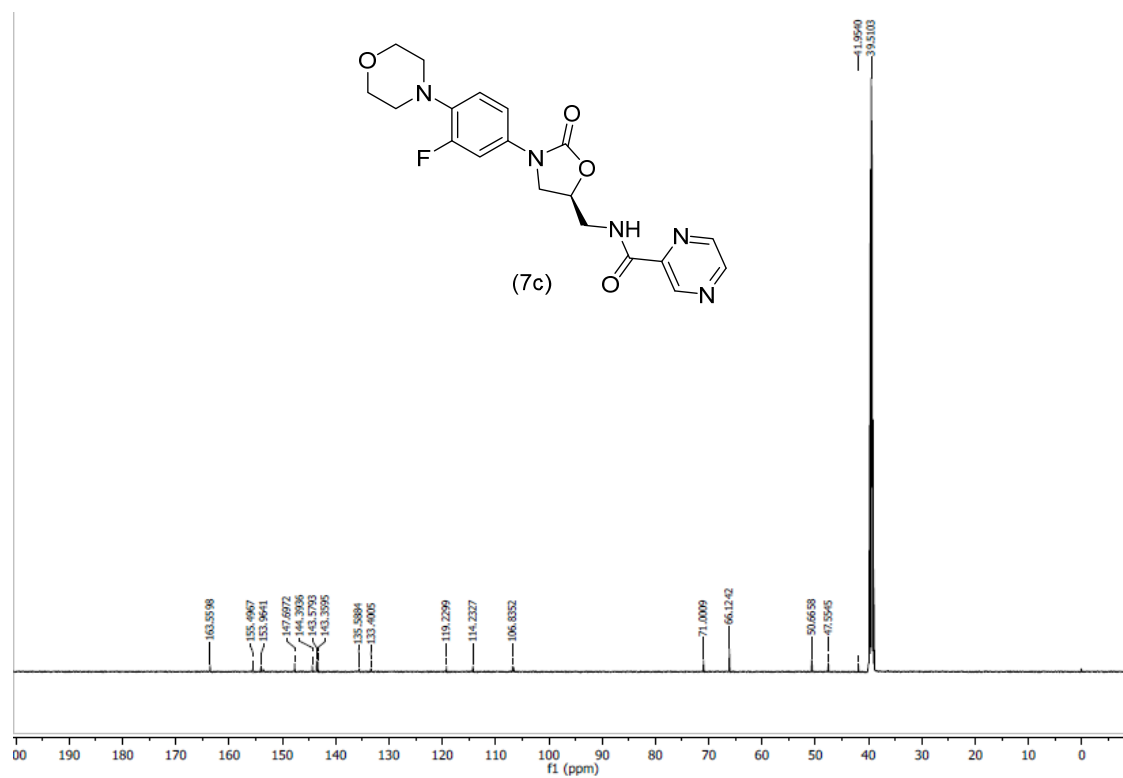

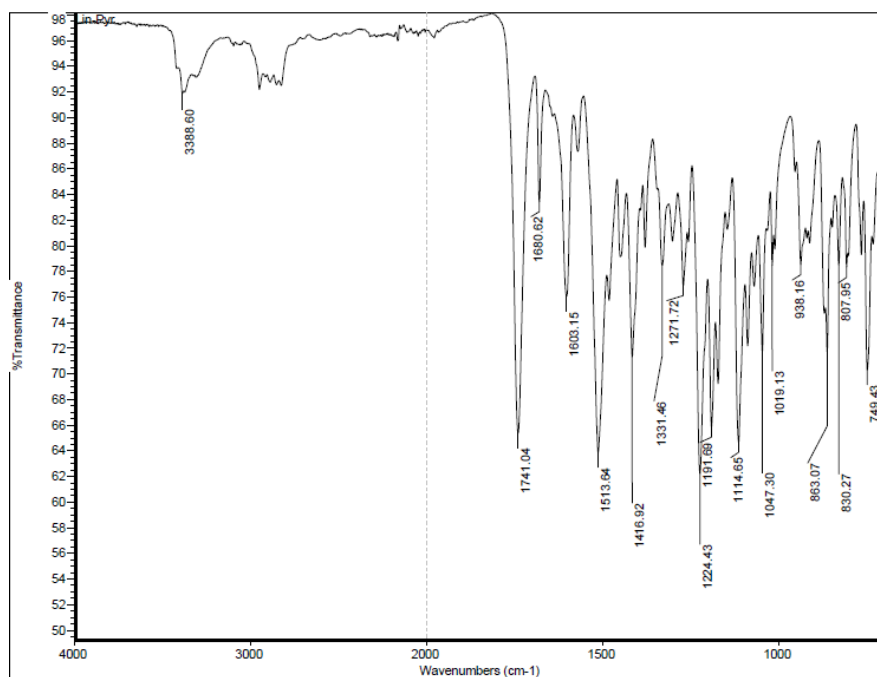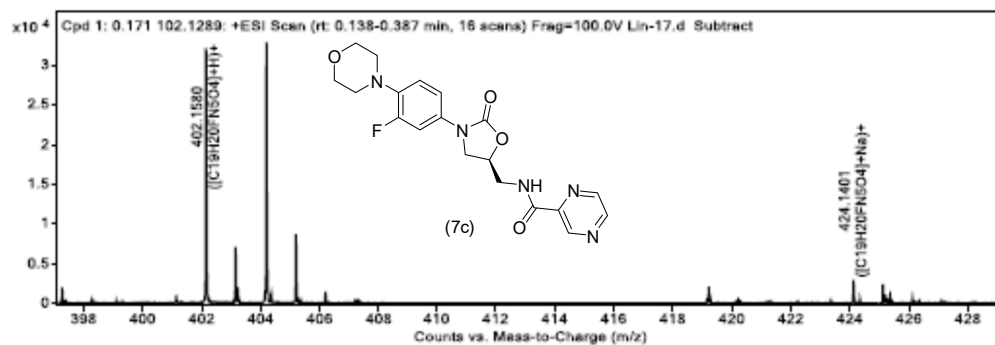

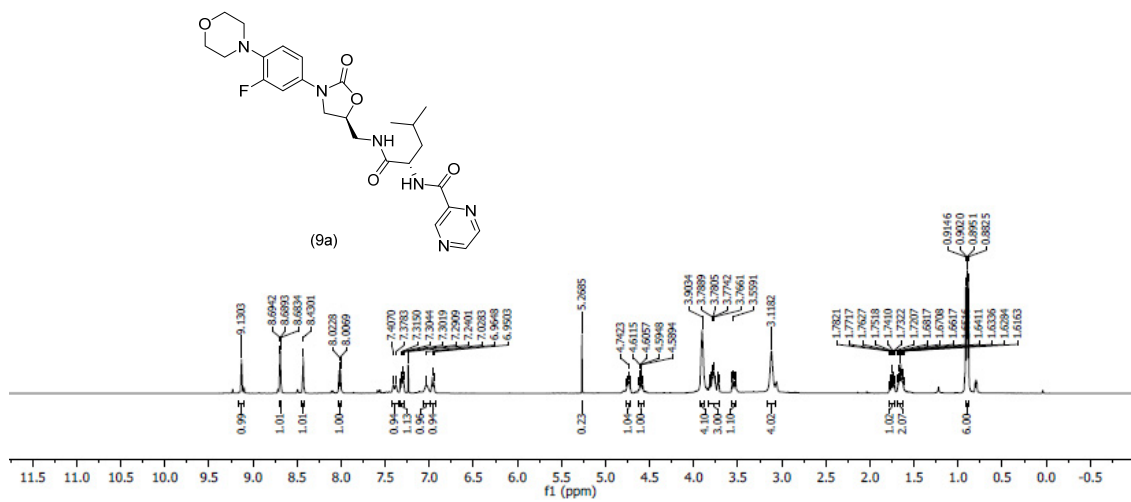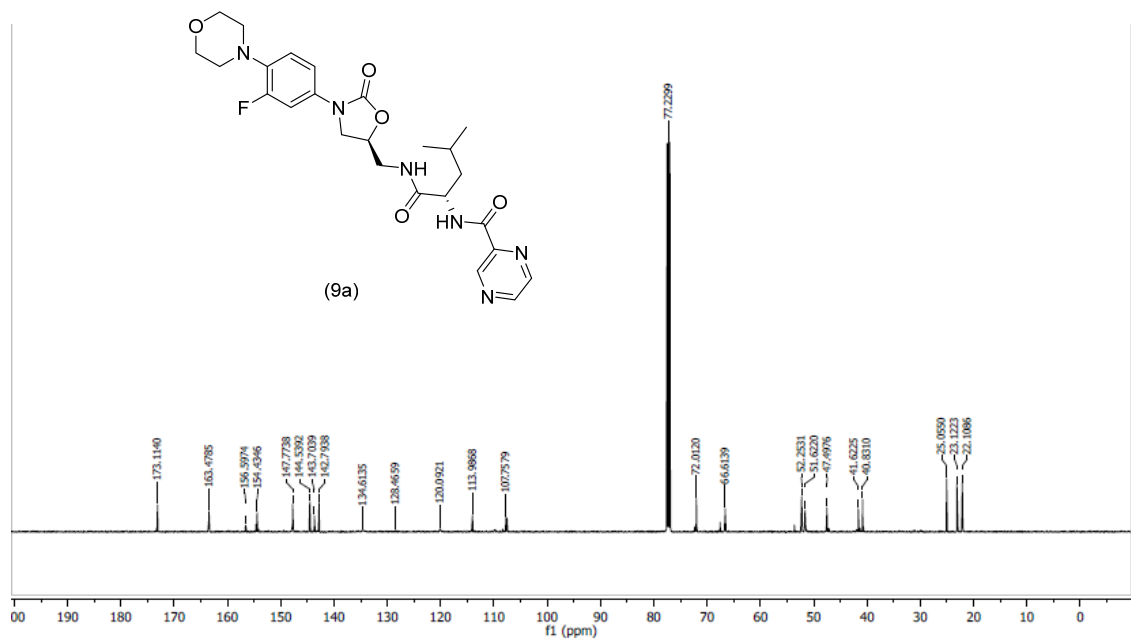

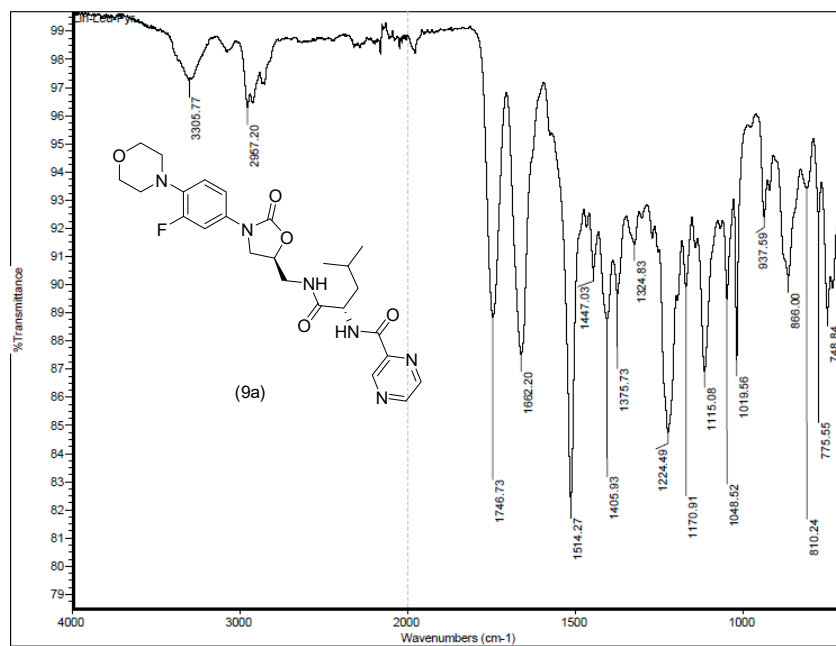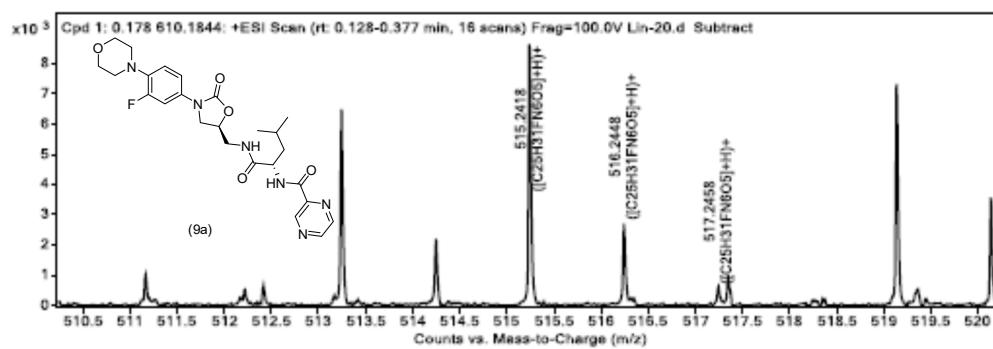

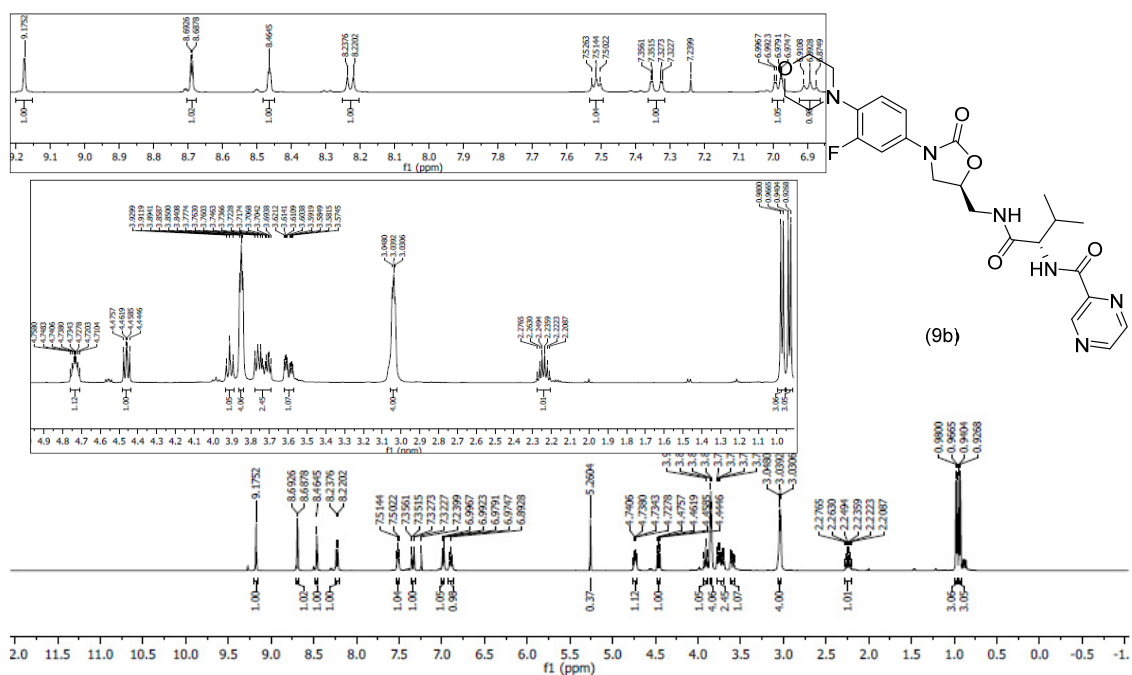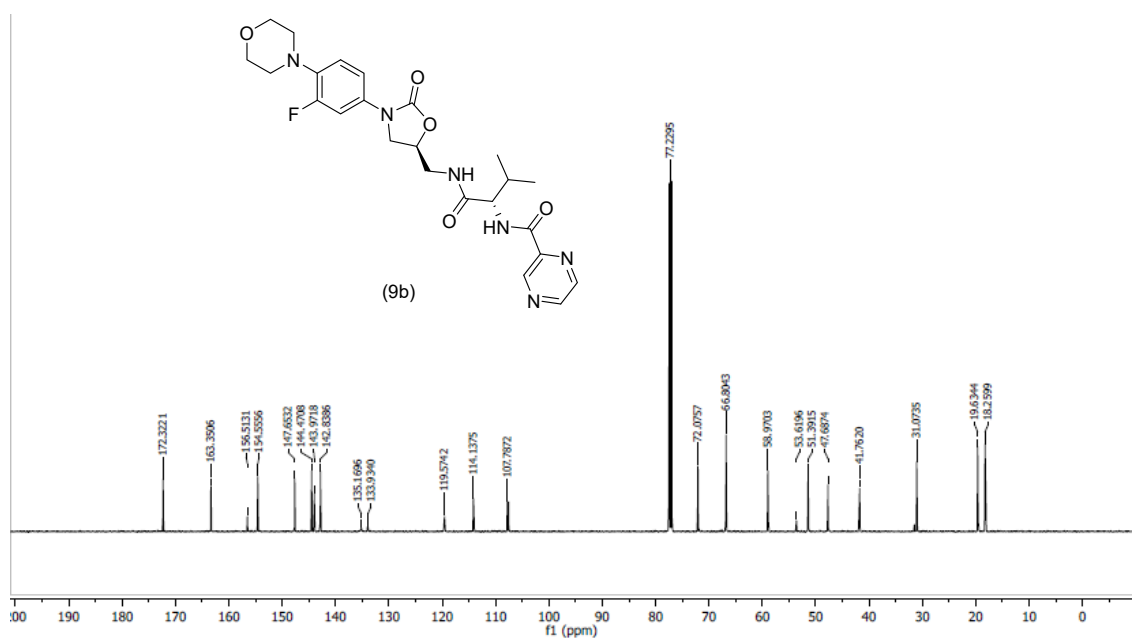

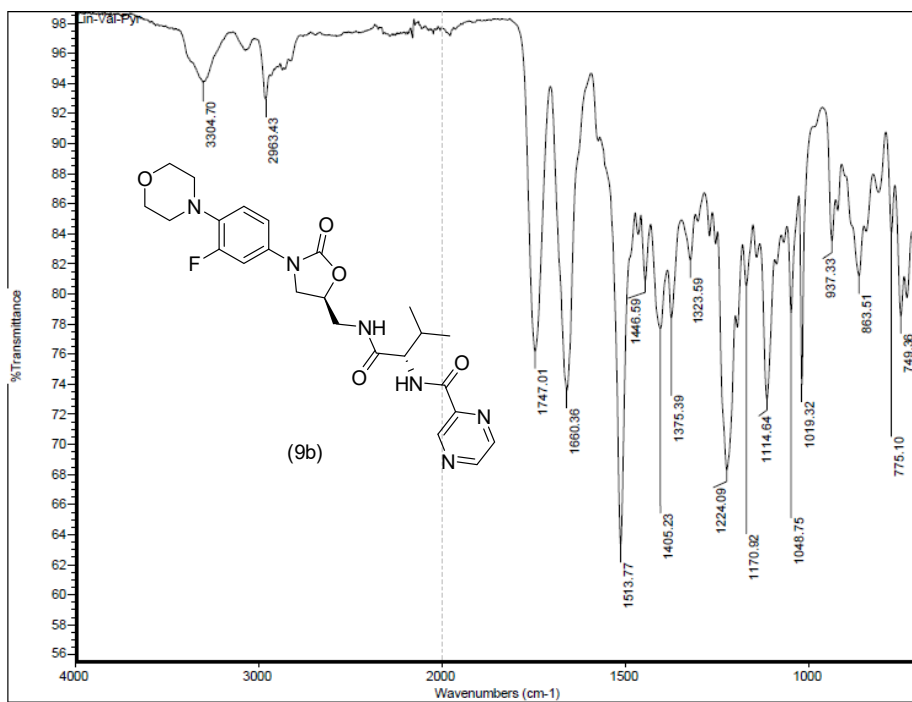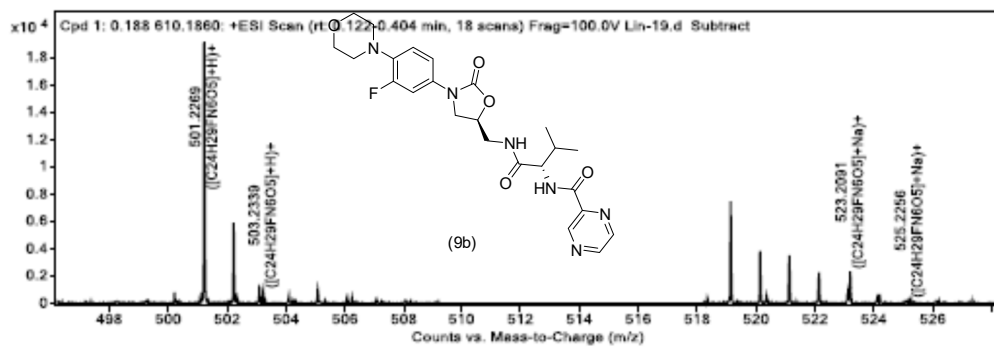

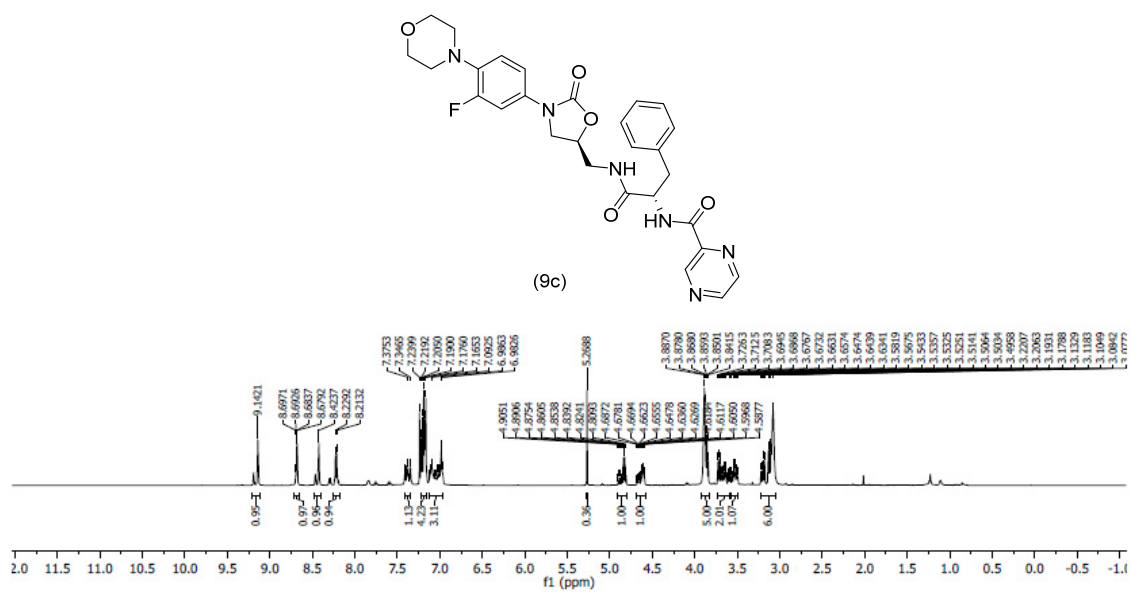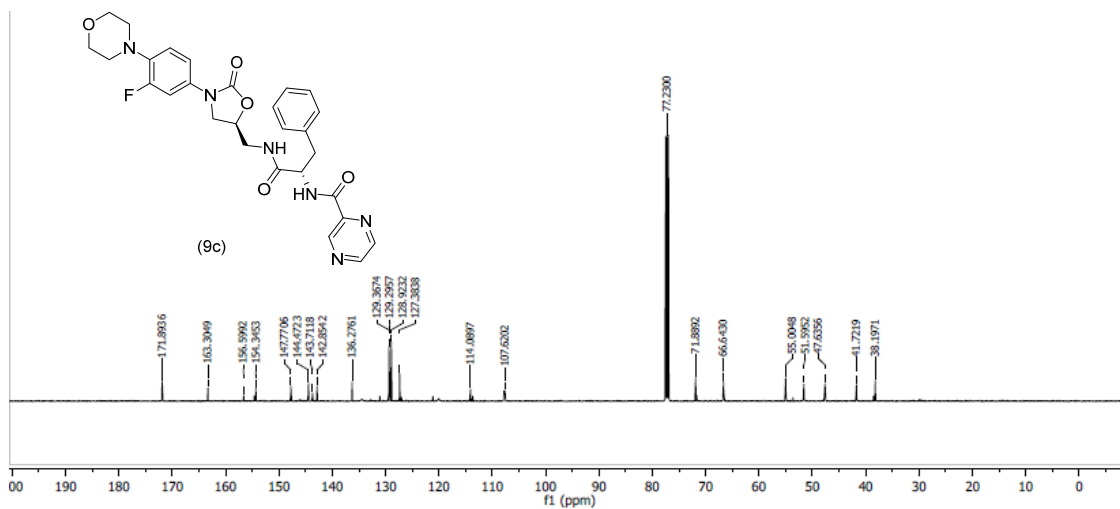



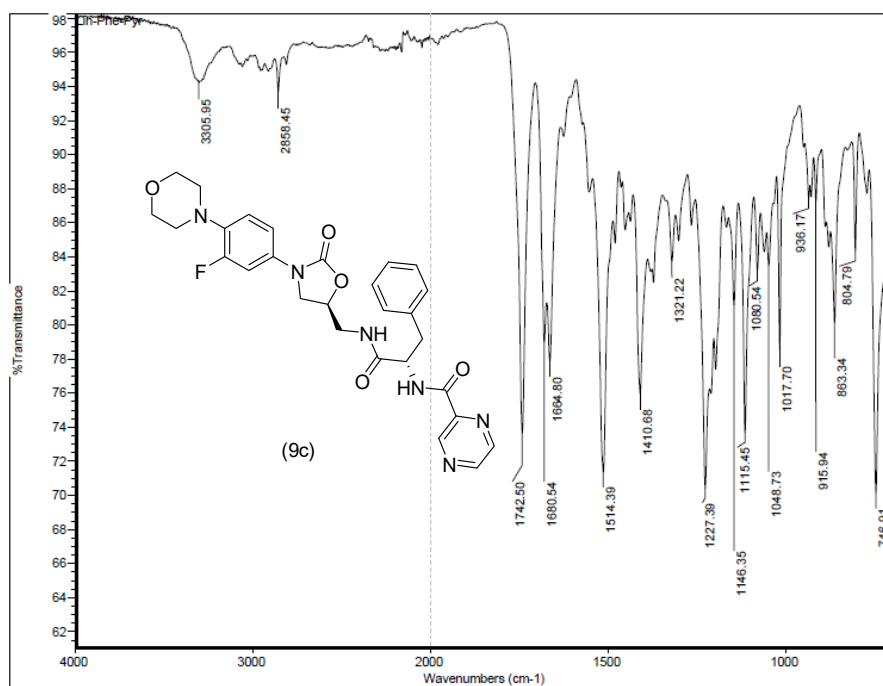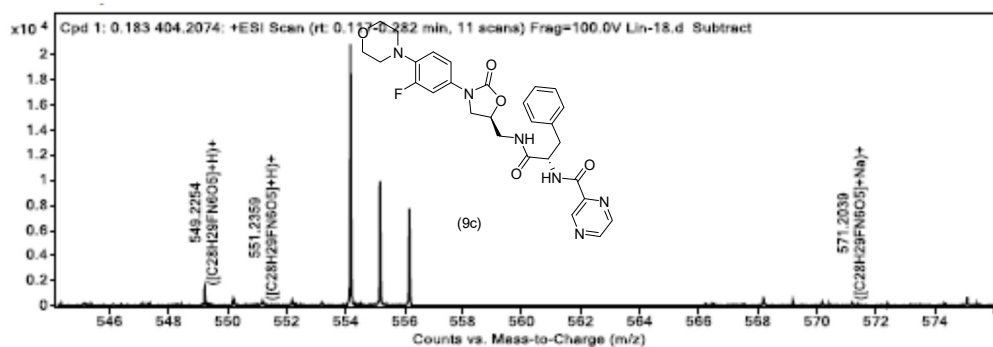

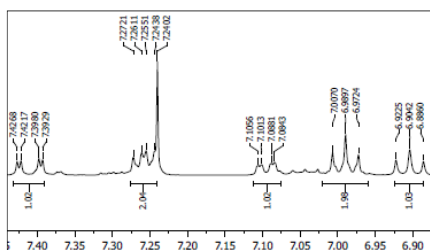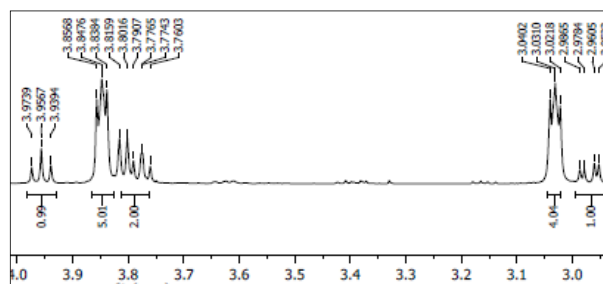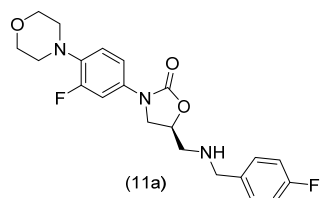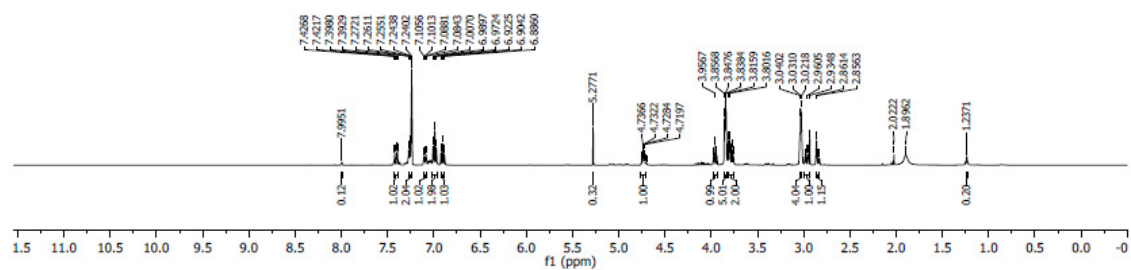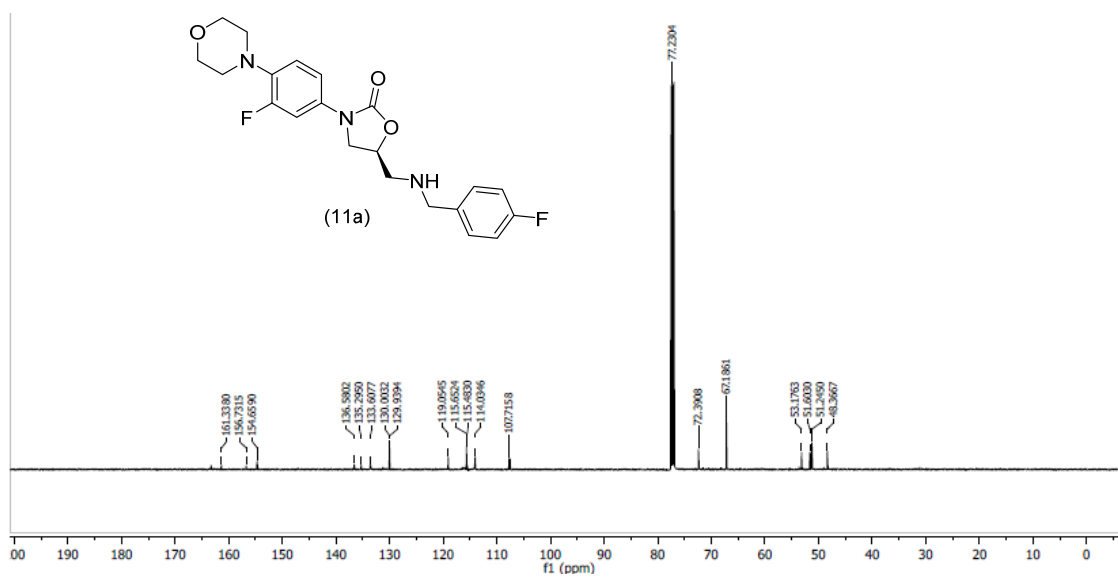

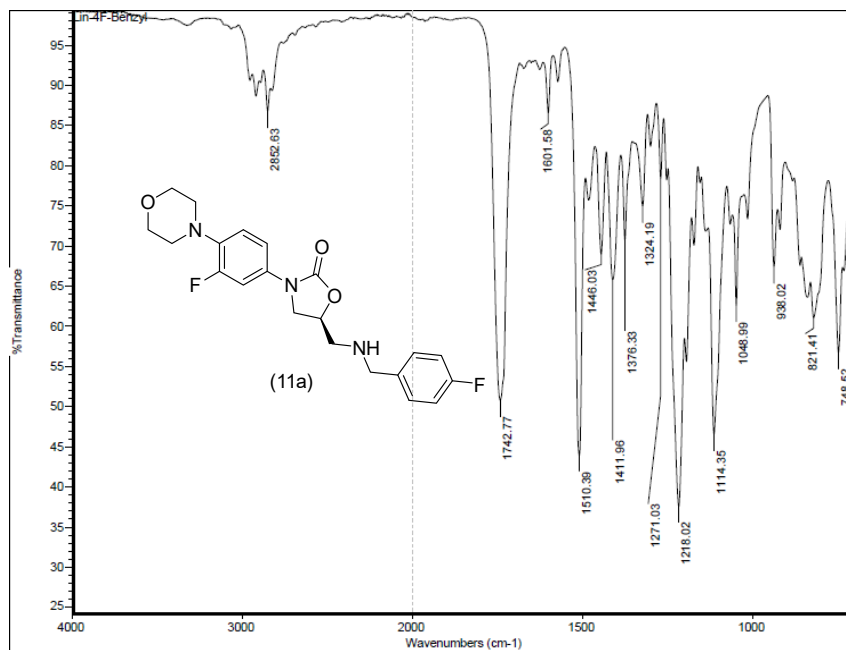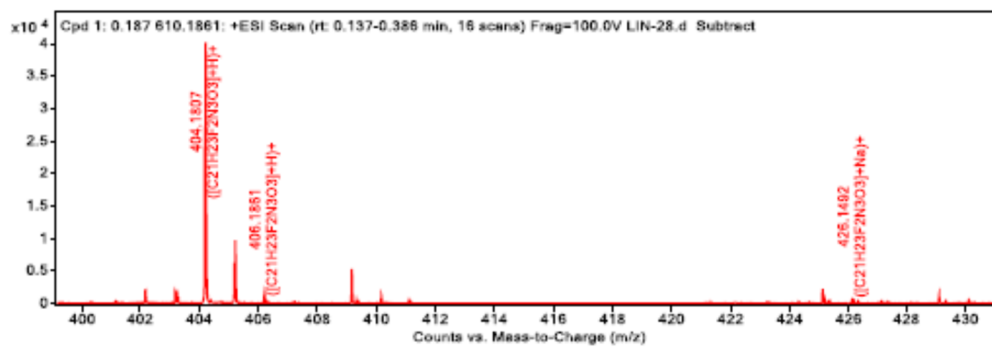



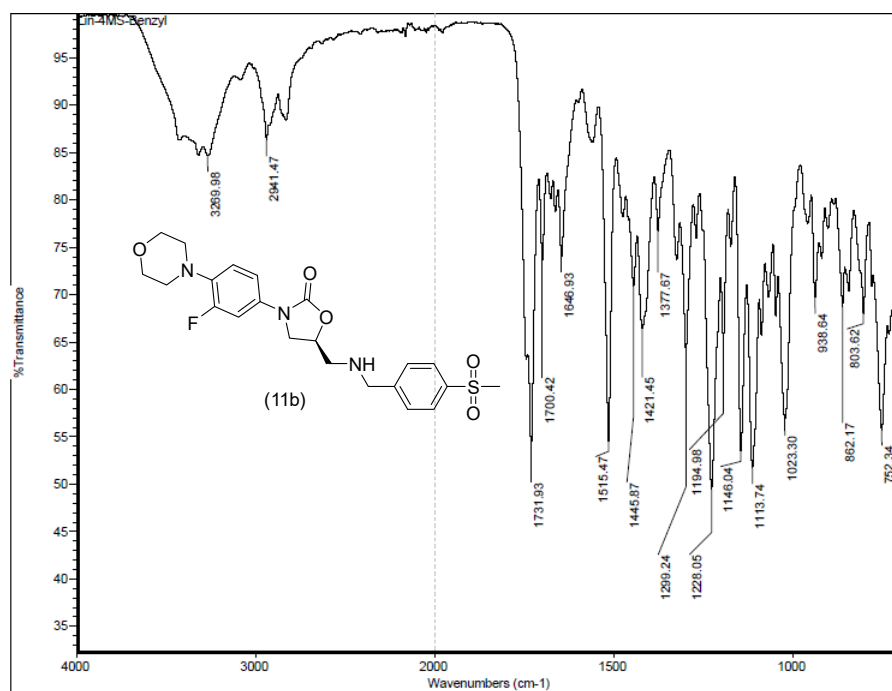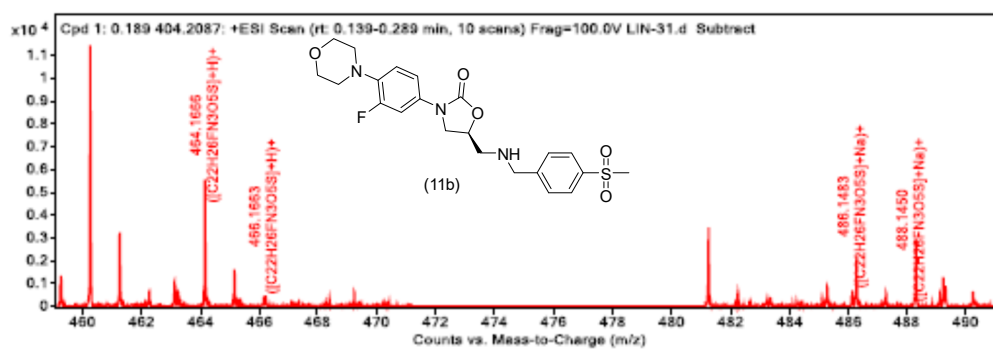

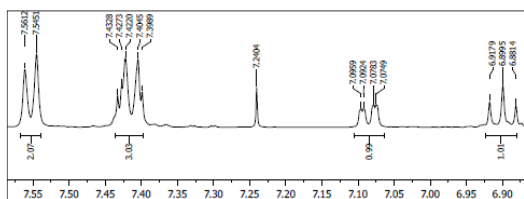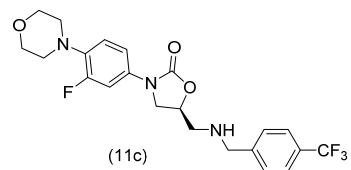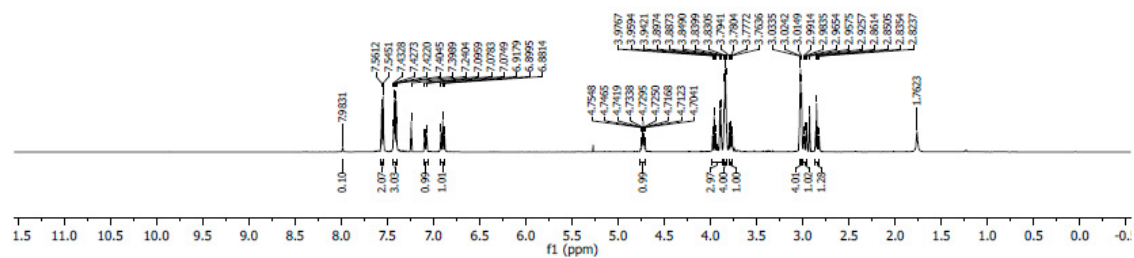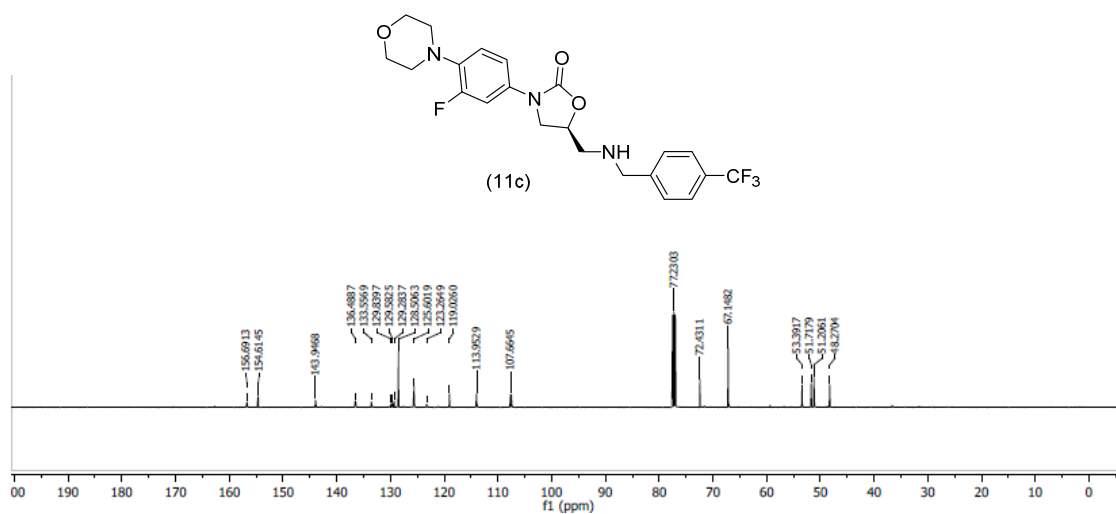

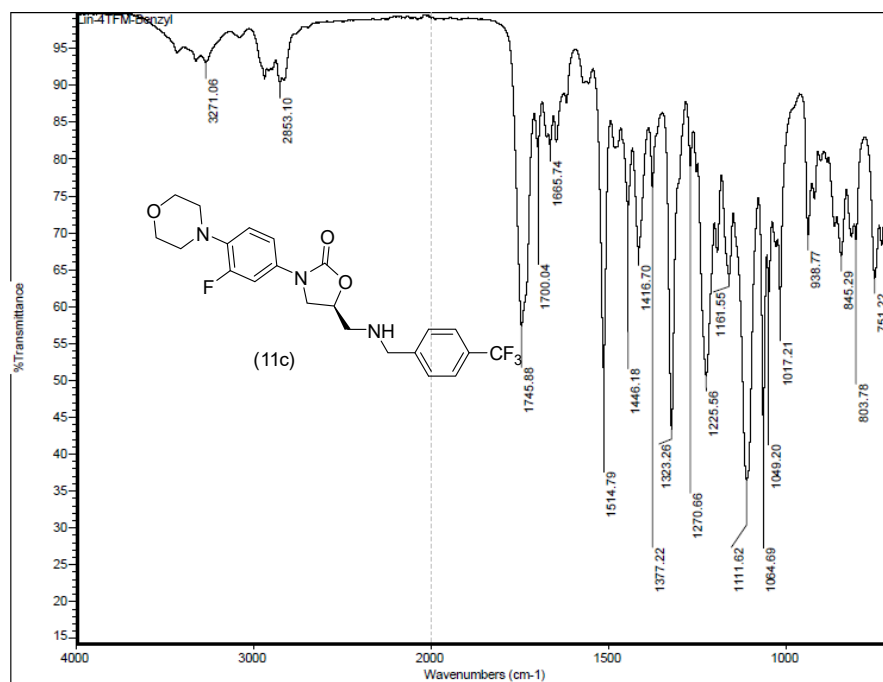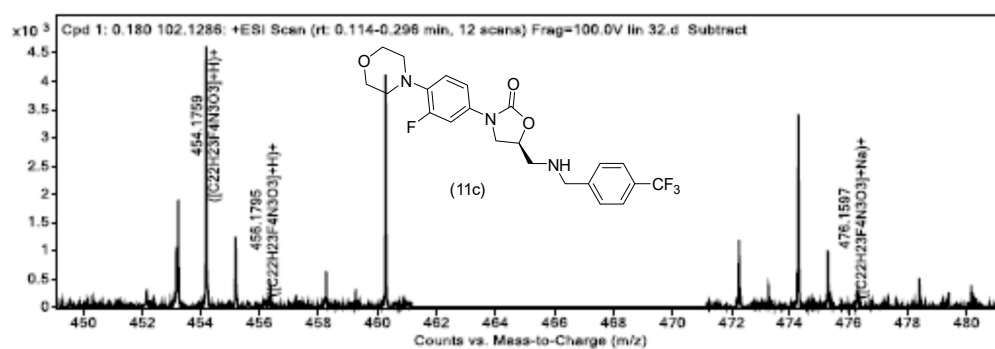

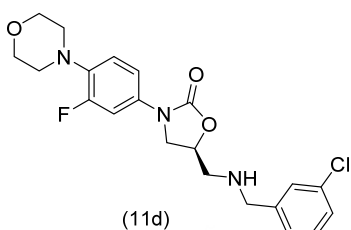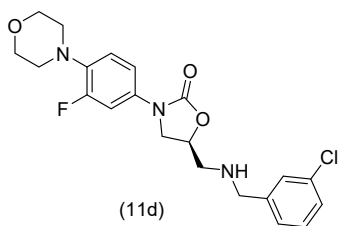



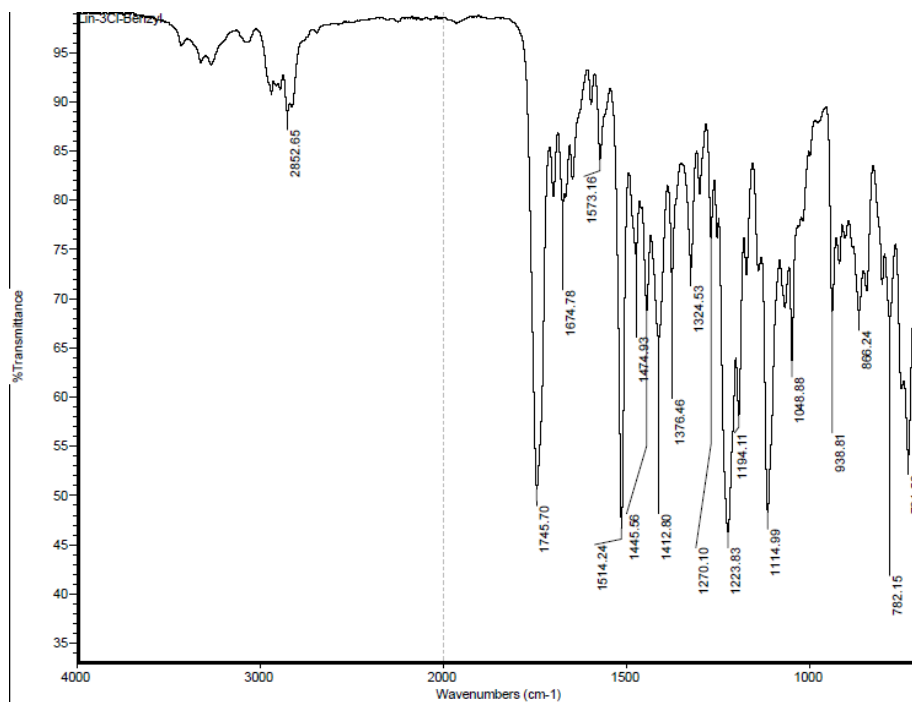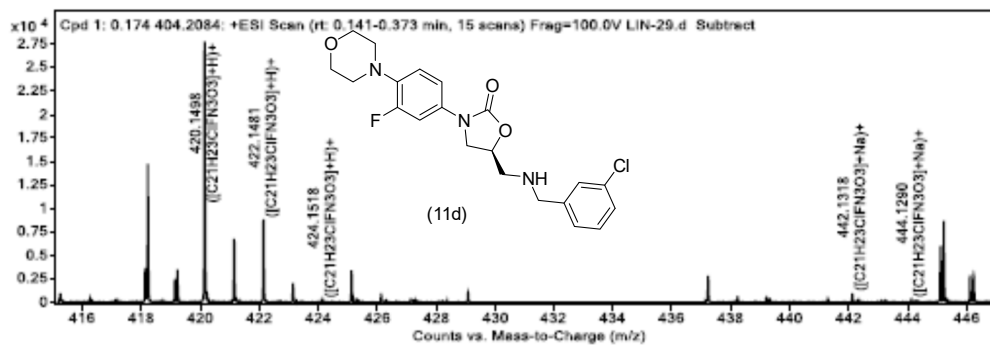



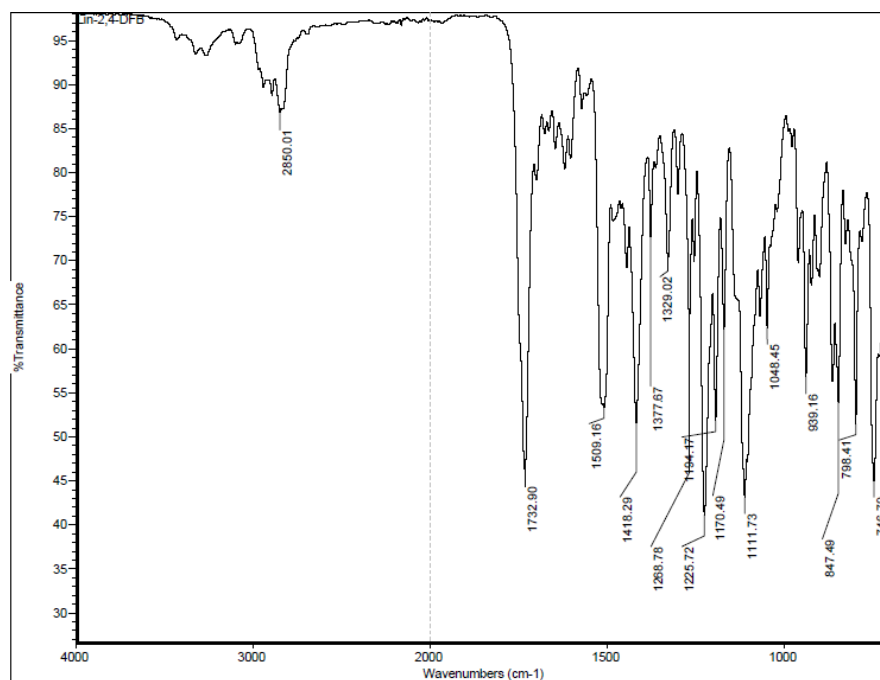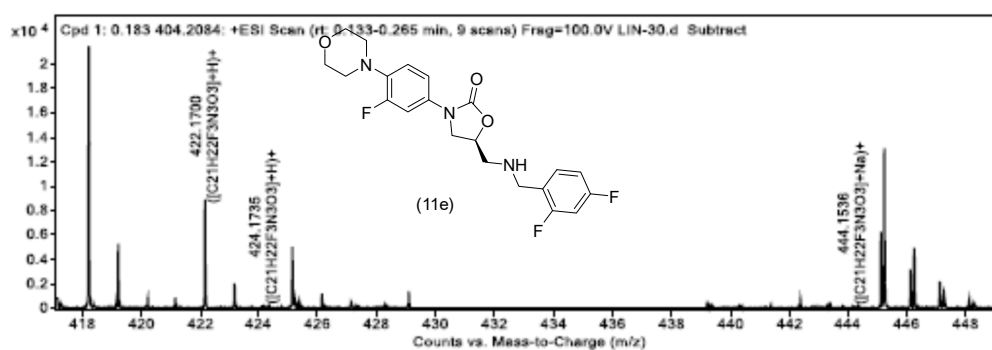

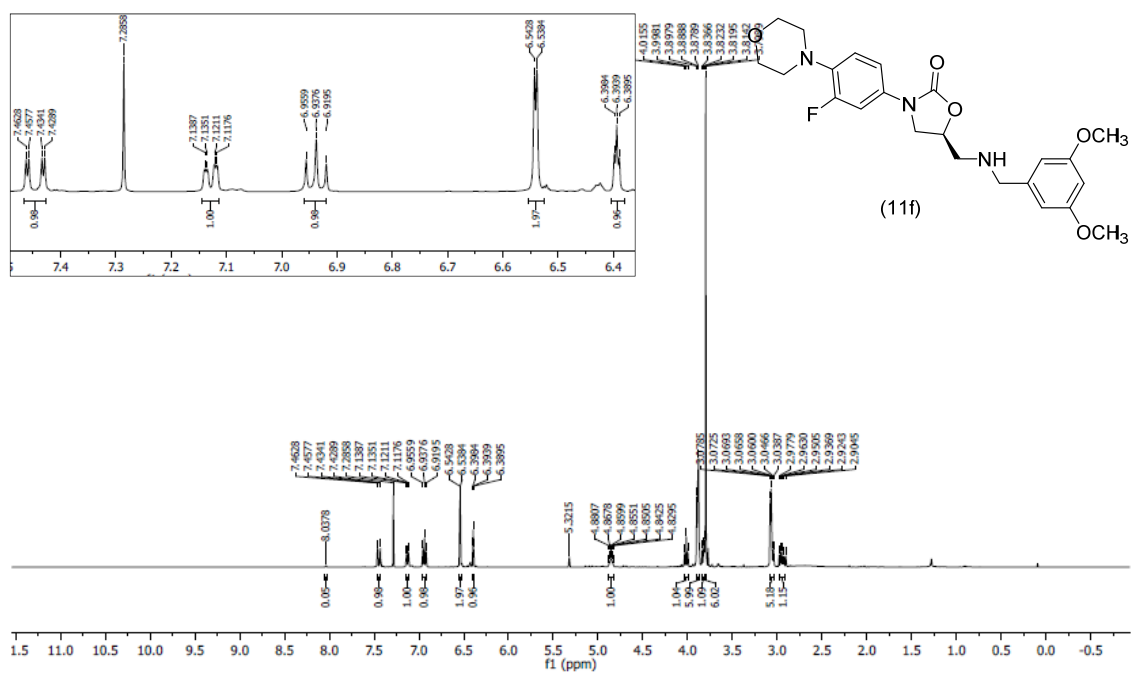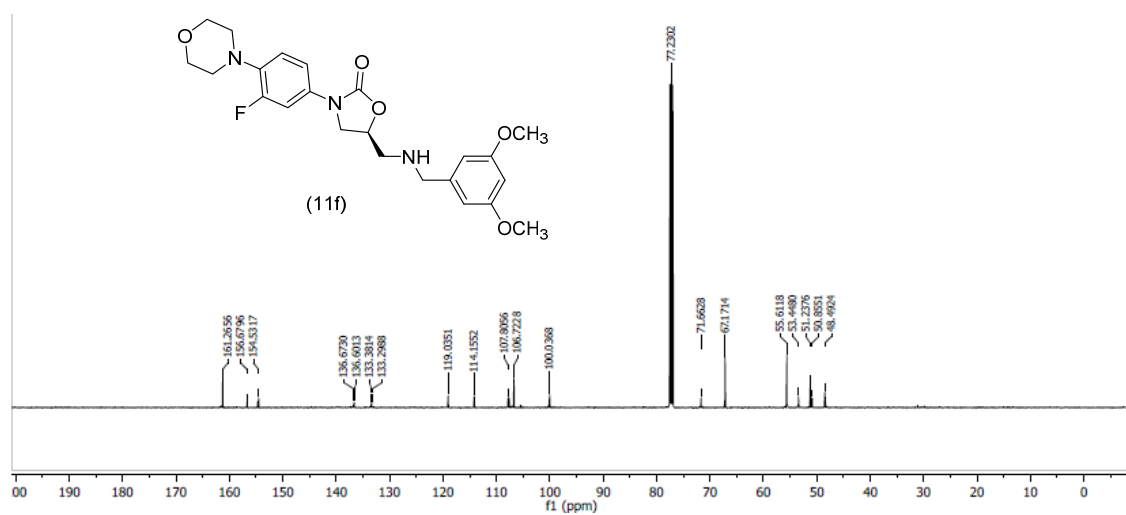

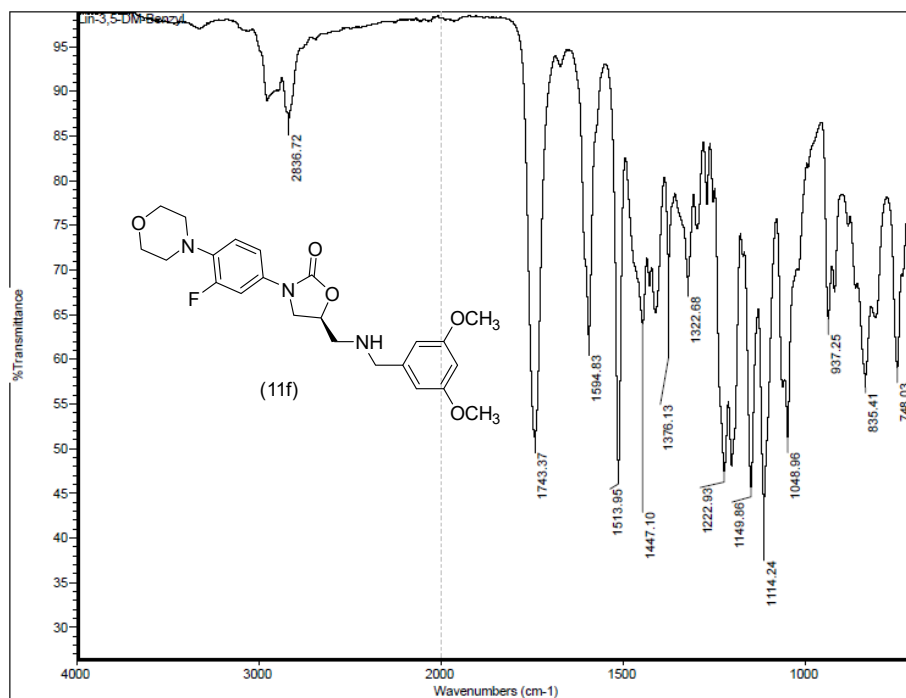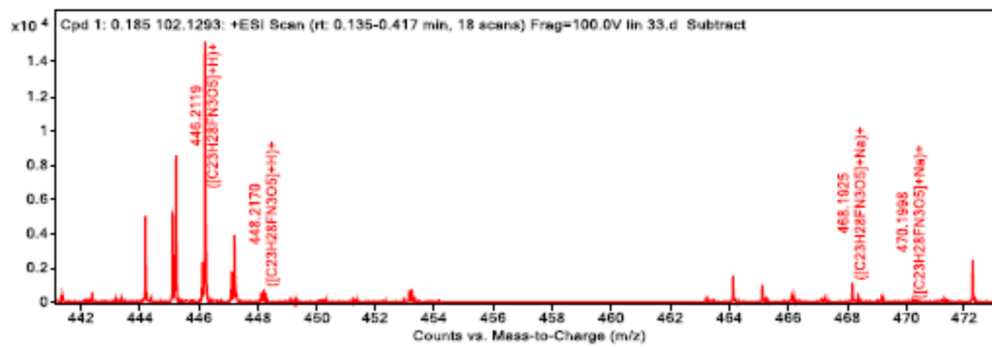

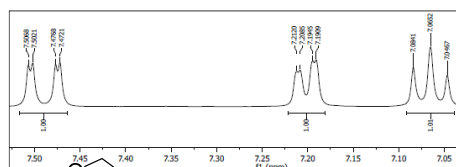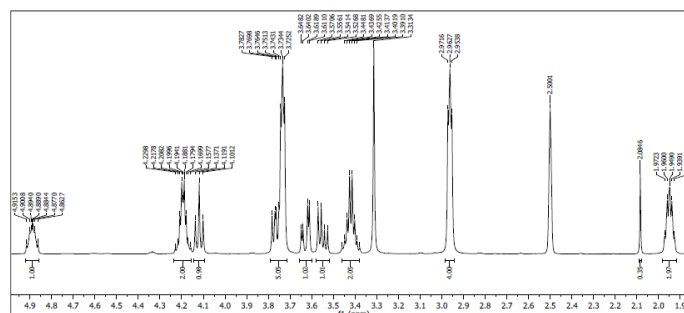

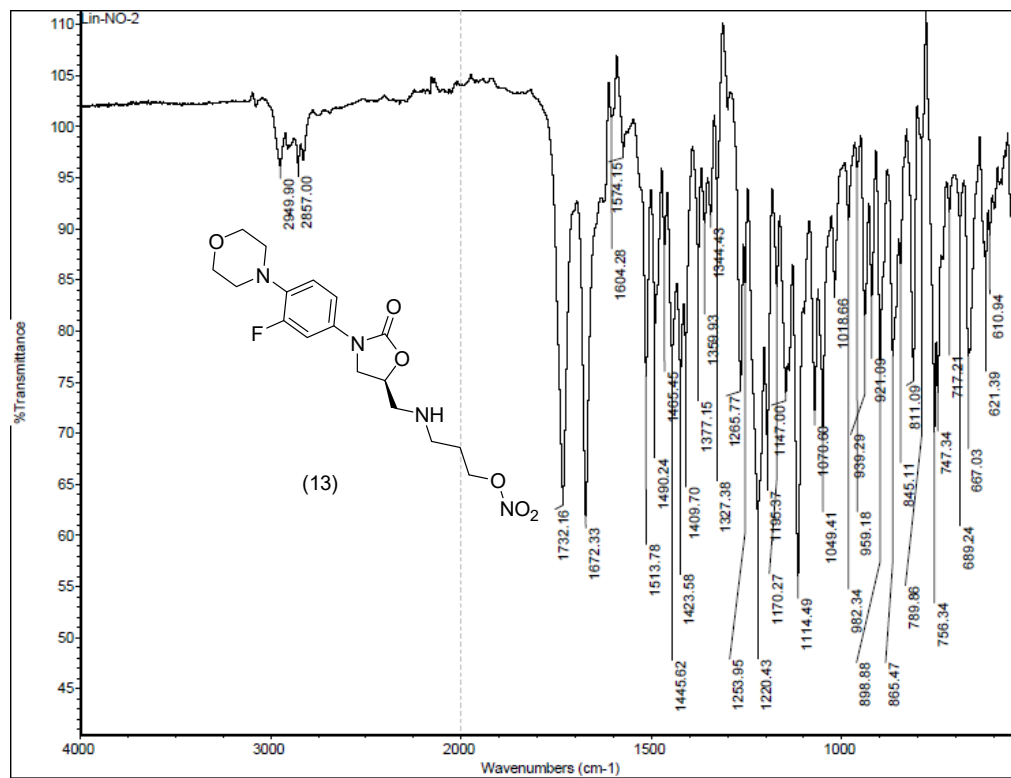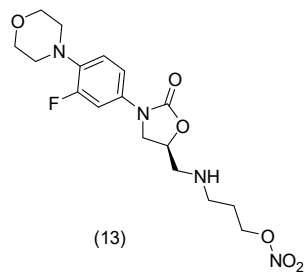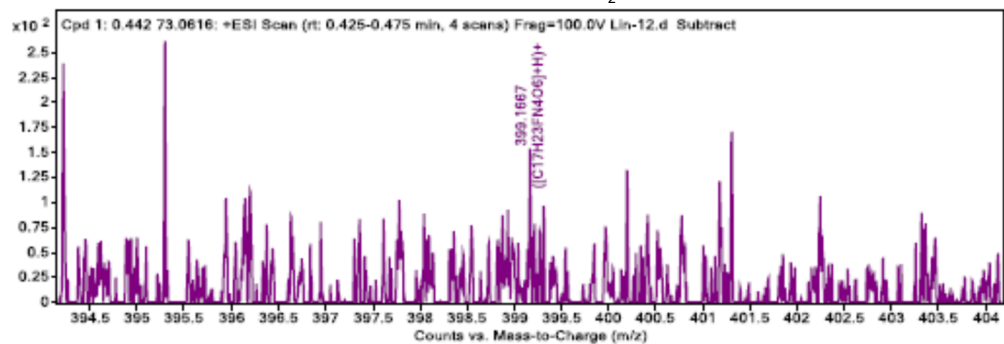

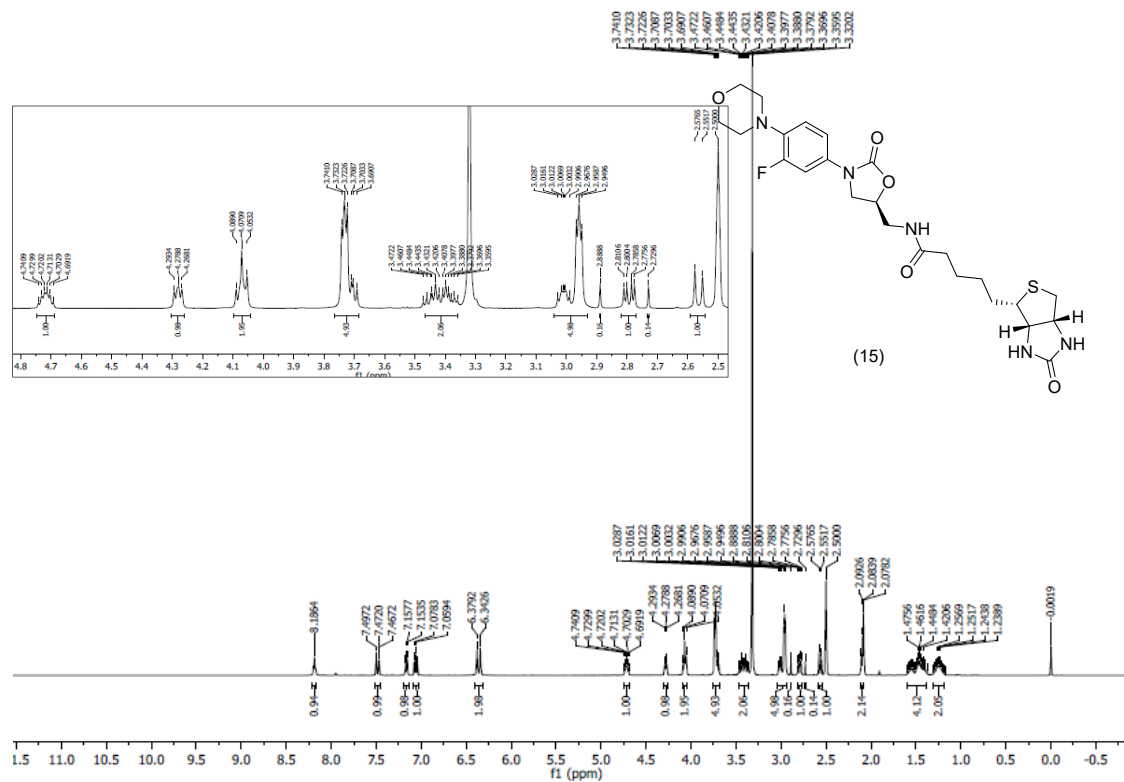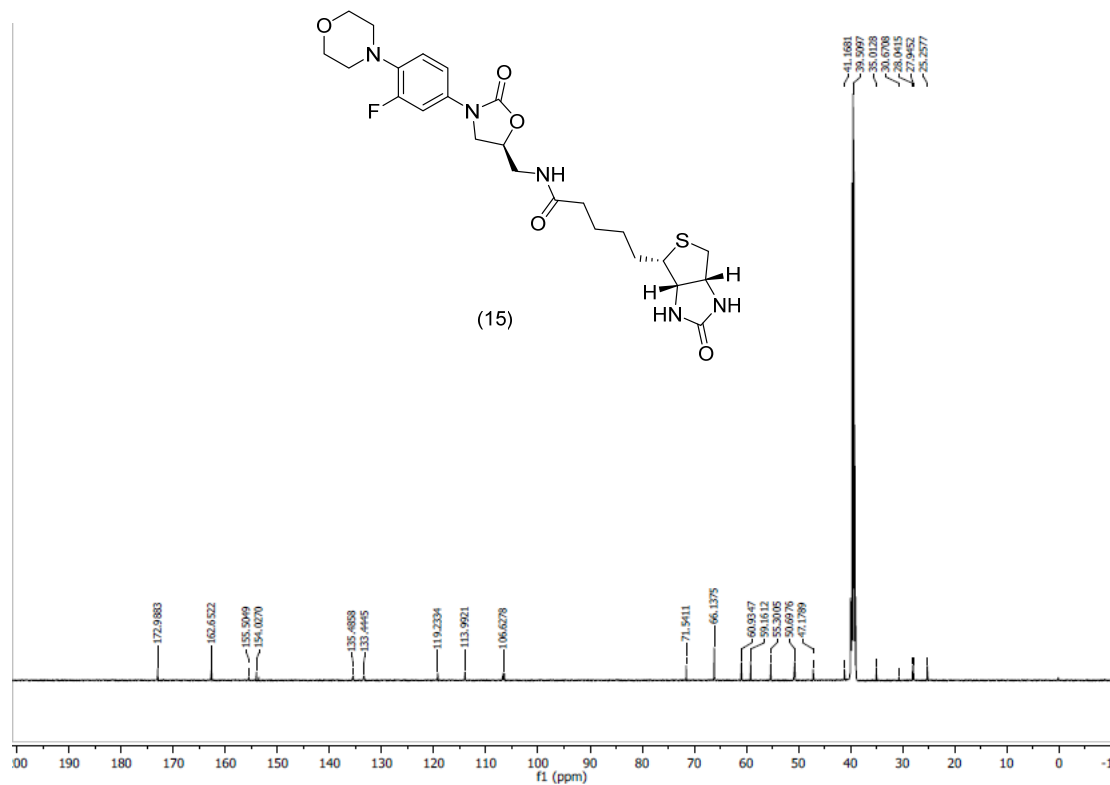



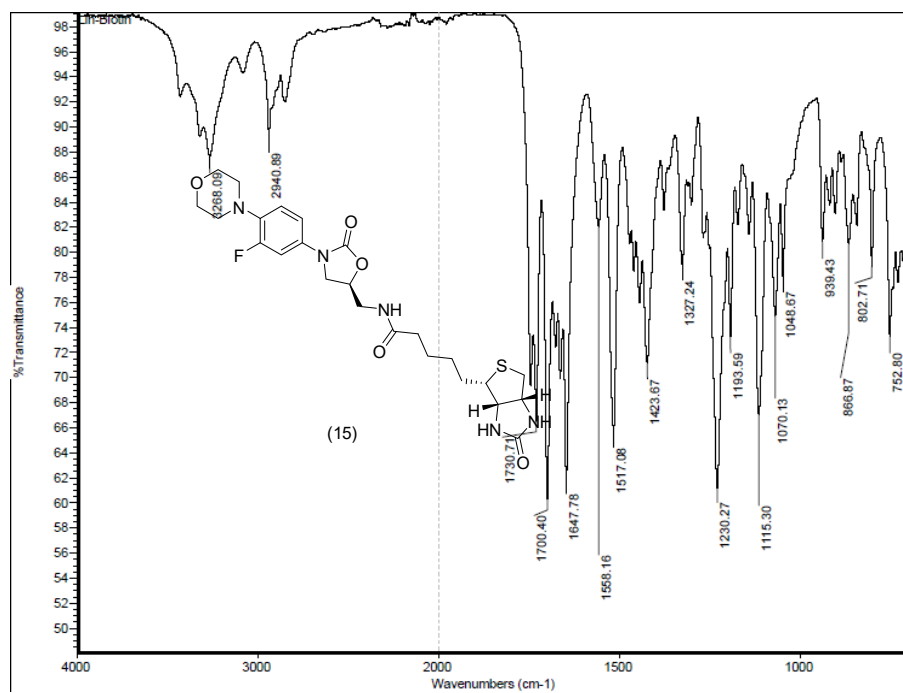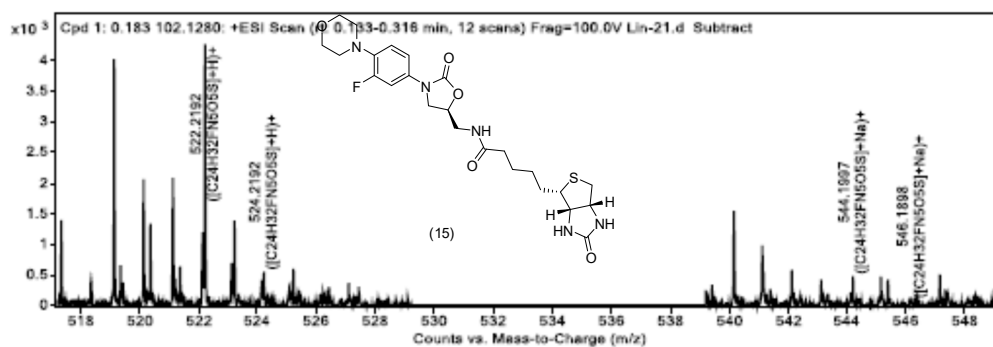

### Antiproliferative properties

The synthesized compounds were screened for their antiproliferative properties against RPE1 (normal human immortalized retinal pigment epithelial cell line) cell (in DMEM-F12 medium) to determine the toxicity towards normal cells relative to the cancer cell lines utilized by the standard mitochondrial dependent reduction of yellow MTT [3-(4,5-dimethylthiazol-2-yl)-2,5-diphenyl-tetrazolium bromide] to purple formazan technique [3]. Cells were suspended in the DMEM-F12 medium in addition to 1% antibiotic–antimycotic mixture (10000  $\mu\text{g ml}^{-1}$  potassium penicillin, 10000  $\mu\text{g ml}^{-1}$  streptomycin sulfate and 25  $\mu\text{g ml}^{-1}$  amphotericin B), 10% fetal bovine serum and 1% L-glutamine at 37 °C, under 5% CO<sub>2</sub> and 95% humidity. Cells were seeded at concentration of 30000 cells per well in fresh complete growth medium in 96-well tissue culture microtiter plates for 24 h. Media was aspirated, fresh complete medium was added and cells were incubated with different concentrations of the tested compound to give a final concentration of [100, 50, 25 and 12.5  $\mu\text{M}$ ]. 0.5% DMSO was used as negative control. Triplicate wells were prepared for each individual dose. After 72 h of incubation, medium was aspirated, 40  $\mu\text{l}$  MTT salt (2.5 mg  $\text{ml}^{-1}$ ) were added to each well and incubated for further 4 h at 37 °C. To stop the reaction and dissolve the formed crystals, 150  $\mu\text{l}$  of 10% sodium dodecyl sulfate (SDS) in deionized water were added to each well and incubated overnight at 37 °C. The absorbance was then measured at 570 nm and a reference wavelength of 595 nm.

Data were collected as mean values for experiments performed in triplicates for each individual dose which had been measured by MTT assay. Control experiments did not exhibit significant change compared to the DMSO vehicle. The cell surviving fraction was calculated according to equ. (1).

$$\text{Surviving fraction} = \frac{\text{Optical density (O.D.) of treated cells}}{\text{O.D. of control cells}} \dots\dots\dots (1)$$

Graph-Pad PRISM version-5 software was used for the needed IC<sub>50</sub> (concentration required to produce 50% inhibition of cell growth compared to the control experiment) . Statistical calculations for determination of the mean and standard error values were determined by SPSS 16 software. The observed anti-proliferative properties are presented in Supplementary Fig. S1.

## QSAR studies

The geometry of the synthesized agents (**3a-k**, **5af**, **7a-c**, **9a-c**, **11a-f**, **13** and **15**) revealing variable antimicrobial properties against the Gram-positive bacteria tested (*S. aureus* and *B. subtilis*) were optimized by the molecular mechanics force field (MM<sup>+</sup>), followed by semi-empirical AM1 method implemented in the HyperChem 8.0 package (<http://www.hyper.com>). The structures were fully optimized without constraining any parameters, thus bringing all geometric variables to their equilibrium values. The energy minimization protocol employed the Polak–Ribiere conjugated gradient algorithm [1, 2]. Convergence to a local minimum was achieved when the energy gradient was  $\leq 0.01$  kcal mol<sup>-1</sup>. The RHF (Restricted Hartree–Fock) method was used in the spin pairing for the semi-empirical tool.

2D-QSAR studies were undertaken to utilize the comprehensive descriptors for structural and statistical analysis (CODESSA-Pro) software [3, 4]. The optimized structures of the bio-active compounds were uploaded to CODESSA-Pro that includes MOPAC capability for the final geometry optimization. CODESSA-Pro calculated 794 molecular descriptors (constitutional, topological, geometrical, charge-related, semi-empirical, thermodynamical, molecular-type, atomic-type and bond-type descriptors) for the exported bio-active agents. Different mathematical transformations [including property (in MIC,  $\mu$ M), 1/property, log(property) and 1/log(property)] of the experimentally observed activity of the set compounds were utilized searching for the best QSAR model. The best multi-linear regression (BMLR) technique was utilized which is a stepwise search for the best  $n$  parameter regression equations (where  $n$  stands for the number of descriptors used), based on the highest  $R^2$  (squared correlation coefficient),  $R^2$ cvOO (squared cross-validation “leave-one-out, LOO” coefficient),  $R^2$ cvMO (squared cross-validation “leave-many-out, LMO” coefficient),  $F$  (Fisher statistical significance criteria) values, and  $s$  (standard deviation). The QSAR models were generated (obeying the thumb rule, which determines a reasonable ratio between the data points and the number of QSAR descriptor) (Tables S1–S6, Figs. S2, S3).

## Pharmacophoric modeling

The 3D-pharmacophoric modeling was undertaken for the synthesized agents (**3a-k**, **5af**, **7a-c**, **9a-c**, **11a-f**, **13** and **15**) revealing variable antimicrobial properties against the Gram-positive bacteria tested (*S. aureus* and *B. subtilis*) by the Discovery Studio 2.5 software adopting the standard technique [5, 6].

## References

- 1- Seliem, I. A.; Panda, S. S.; Girgis, A. S.; Moatasim, Y.; Kandeil, A.; Mostafa, A.; Ali, M. A.; Nossier, E. S.; Rasslan, F.; Srour, A. M.; Sakhuja, R.; Ibrahim, T. S.; Abdel-samii, Z. K. M.; Al-Mahmoudy, A. M. M. New quinoline-triazole conjugates: Synthesis, and antiviral properties against SARS-CoV-2, Bioorg. Chem. 2021, 114, 105117. doi.org/10.1016/j.bioorg.2021.105117
- 2- Srour, A. M.; Panda, S. S.; Mostafa, A.; Fayad, W.; El-Manawaty, M. A.; Soliman, A. A. F.; Moatasim, Y.; El Taweel, A.; Abdelhameed, M. F.; Bekheit, M. S.; Ali, M. A.; Girgis, A. S. Synthesis of aspirin-curcumin mimic conjugates of potential antitumor and anti-SARS-CoV-2 properties, Bioorg. Chem. 2021, 117, 105466. <https://doi.org/10.1016/j.bioorg.2021.105466>
- 3- Girgis, A. S.; Tala, S. R.; Oliferenko, P. V.; Oliferenko, A. A.; Katritzky, A. R. Computer-assisted rational design, synthesis, and bioassay of nonsteroidal anti-inflammatory agents, Eur. J. Med. Chem. 2012, 50, 1–8. doi:10.1016/j.ejmech.2011.11.034
- 4- Ghanim, A. M.; Girgis, A. S.; Kariuki, B. M.; Samir, N.; Said, M. F.; Abdelnaser, A.; Nasr, S.; Bekheit, M. S.; Abdelhameed, M. F.; Almalki, A. J.; Ibrahim, T. S.; Panda, S. S. Design and synthesis of ibuprofen-quinoline conjugates as potential anti-inflammatory and analgesic drug candidates, Bioorg. Chem. 2022, 119, 105557. doi.org/10.1016/j.bioorg.2021.105557
- 5- Youssef, M. A.; Panda, S. S.; El-Shiekh, R. A.; Shalaby, E. M.; Aboshouk, D. R.; Fayad, W.; Fawzy, N. G.; Girgis, A. S. Synthesis and molecular modeling studies of cholinesterase inhibitor dispiro[indoline-3,2'-pyrrolidine-3',3''-pyrrolidines], RSC Adv. 2020, 10, 21830–21838. DOI: 10.1039/d0ra03064c

- 6- Aziz, M. N.; Panda, S. S.; Shalaby, E. M.; Fawzy, N. G.; Girgis, A. S. Facile synthetic approach towards vasorelaxant active 4-hydroxyquinazoline-4-carboxamides, RSC Adv. 2019, 9, 28534–28540. DOI: 10.1039/c9ra04321g

**Table S1.** Descriptors of the QSAR model for the tested agents against *S. aureus*.

| Entry                                                                                                                                                                                                                                       | ID                    | Coefficient | <i>s</i> | <i>t</i> | Descriptor                                           |
|---------------------------------------------------------------------------------------------------------------------------------------------------------------------------------------------------------------------------------------------|-----------------------|-------------|----------|----------|------------------------------------------------------|
| 1                                                                                                                                                                                                                                           | 0                     | 74.0004     | 5.874    | 12.597   | Intercept                                            |
| 2                                                                                                                                                                                                                                           | <i>D</i> <sub>1</sub> | 3.29174     | 0.417    | 7.890    | Partial surface area for atom H                      |
| 3                                                                                                                                                                                                                                           | <i>D</i> <sub>2</sub> | 0.00087934  | 0.0001   | 6.954    | DPSA2 difference in CPSAs (PPSA2-PNSA2) (Zefirov PC) |
| 4                                                                                                                                                                                                                                           | <i>D</i> <sub>3</sub> | -0.426925   | 0.083    | -5.124   | HOMO energy                                          |
| 5                                                                                                                                                                                                                                           | <i>D</i> <sub>4</sub> | -0.475568   | 0.036    | -13.155  | Max. e-e repulsion for bond C-N                      |
| $N = 31, n = 4, R^2 = 0.926, R^2_{cvOO} = 0.898, R^2_{cvMO} = 0.903, F = 81.973, s^2 = 0.010$<br>$\log(\text{MIC}, \mu\text{M}) = 74.0004 + (3.29174 \times D_1) + (0.00087934 \times D_2) - (0.426925 \times D_3) - (0.475568 \times D_4)$ |                       |             |          |          |                                                      |

**Table S2.** Observed and estimated antimicrobial properties for the tested compounds agents against *S. aureus* according to the BMLR-QSAR model.

| Entry | Compd.     | log(observed MIC, $\mu$ M) | Observed MIC, $\mu$ M | log(estimated MIC, $\mu$ M) | Estimated MIC, $\mu$ M | Error*  |
|-------|------------|----------------------------|-----------------------|-----------------------------|------------------------|---------|
| 1     | <b>3a</b>  | 1.51704                    | 32.888                | 1.54496                     | 35.072                 | -2.184  |
| 2     | <b>3b</b>  | 1.80572                    | 63.932                | 1.66028                     | 45.738                 | 18.194  |
| 3     | <b>3c</b>  | 1.78204                    | 60.54                 | 1.91449                     | 82.128                 | -21.588 |
| 4     | <b>3d</b>  | 1.75647                    | 57.078                | 1.92461                     | 84.064                 | -26.986 |
| 5     | <b>3e</b>  | 1.74425                    | 55.495                | 1.69024                     | 49.005                 | 6.490   |
| 6     | <b>3f</b>  | 1.84955                    | 70.721                | 1.75121                     | 56.391                 | 14.330  |
| 7     | <b>3g</b>  | 1.83629                    | 68.594                | 1.77841                     | 60.036                 | 8.558   |
| 8     | <b>3h</b>  | 1.81093                    | 64.704                | 1.73129                     | 53.863                 | 10.841  |
| 9     | <b>3i</b>  | 1.78365                    | 60.765                | 1.78526                     | 60.990                 | -0.225  |
| 10    | <b>3j</b>  | 2.07169                    | 117.948               | 2.03436                     | 108.233                | 9.715   |
| 11    | <b>3k</b>  | 1.79878                    | 62.919                | 1.80741                     | 64.182                 | -1.263  |
| 12    | <b>5a</b>  | 1.00065                    | 10.015                | 1.16152                     | 14.505                 | -4.490  |
| 13    | <b>5b</b>  | 0.981501                   | 9.583                 | 1.01677                     | 10.394                 | -0.811  |
| 14    | <b>5c</b>  | 1.26574                    | 18.439                | 1.30165                     | 20.029                 | -1.590  |
| 15    | <b>5d</b>  | 0.653213                   | 4.5                   | 0.79323                     | 6.212                  | -1.712  |
| 16    | <b>5e</b>  | 0.970161                   | 9.336                 | 0.977633                    | 9.498                  | -0.162  |
| 17    | <b>5f</b>  | 1.22287                    | 16.706                | 1.12631                     | 13.375                 | 3.331   |
| 18    | <b>7a</b>  | 1.3006                     | 19.98                 | 1.29432                     | 19.693                 | 0.287   |
| 19    | <b>7b</b>  | 1.3006                     | 19.98                 | 1.32712                     | 21.238                 | -1.258  |
| 20    | <b>7c</b>  | 1.29951                    | 19.93                 | 1.16767                     | 14.712                 | 5.218   |
| 21    | <b>9a</b>  | 1.79371                    | 62.189                | 1.78847                     | 61.443                 | 0.746   |
| 22    | <b>9b</b>  | 1.80572                    | 63.932                | 1.96232                     | 91.690                 | -27.758 |
| 23    | <b>9c</b>  | 1.76591                    | 58.332                | 1.75686                     | 57.129                 | 1.203   |
| 24    | <b>11a</b> | 1.89938                    | 79.32                 | 1.84876                     | 70.593                 | 8.727   |
| 25    | <b>11b</b> | 1.83908                    | 69.037                | 1.8294                      | 67.515                 | 1.522   |
| 26    | <b>11c</b> | 1.84863                    | 70.572                | 1.91082                     | 81.437                 | -10.865 |

|    |            |         |        |         |         |         |
|----|------------|---------|--------|---------|---------|---------|
| 27 | <b>11d</b> | 1.88202 | 76.212 | 1.84101 | 69.344  | 6.868   |
| 28 | <b>11e</b> | 1.88044 | 75.934 | 1.7744  | 59.484  | 16.450  |
| 29 | <b>11f</b> | 1.85631 | 71.831 | 2.05724 | 114.088 | -42.257 |
| 30 | <b>13</b>  | 1.90484 | 80.323 | 1.77181 | 59.130  | 21.193  |
| 31 | <b>15</b>  | 1.78781 | 61.349 | 1.68528 | 48.448  | 12.901  |

\*Error is the difference between the observed and estimated property (MIC,  $\mu\text{M}$ ).



**Table S3.** Molecular descriptor values of the QSAR model for the tested compounds against *S. aureus*.

| Entry | Compd      | Descriptors* |          |        |          |
|-------|------------|--------------|----------|--------|----------|
|       |            | $D_1$        | $D_2$    | $D_3$  | $D_4$    |
| 1     | <b>3a</b>  | 0.56246      | 1062.344 | -8.611 | 165.9433 |
| 2     | <b>3b</b>  | 0.61536      | 1124.793 | -8.81  | 166.3611 |
| 3     | <b>3c</b>  | 0.65382      | 1235.027 | -8.942 | 166.4151 |
| 4     | <b>3d</b>  | 0.65641      | 1128.694 | -8.653 | 165.9557 |
| 5     | <b>3e</b>  | 0.58863      | 1308.602 | -8.31  | 166.0041 |
| 6     | <b>3f</b>  | 0.67343      | 1075.835 | -8.727 | 166.4068 |
| 7     | <b>3g</b>  | 0.67728      | 1079.986 | -8.544 | 166.2197 |
| 8     | <b>3h</b>  | 0.68871      | 1188.451 | -8.41  | 166.4781 |
| 9     | <b>3i</b>  | 0.62159      | 1280.543 | -8.697 | 166.328  |
| 10    | <b>3j</b>  | 0.6916       | 1250.482 | -8.486 | 166.0438 |
| 11    | <b>3k</b>  | 0.69999      | 1272.396 | -8.528 | 166.6573 |
| 12    | <b>5a</b>  | 0.56527      | 763.6985 | -8.581 | 166.1899 |
| 13    | <b>5b</b>  | 0.52992      | 803.3015 | -8.769 | 166.4916 |
| 14    | <b>5c</b>  | 0.55014      | 752.541  | -9.074 | 166.2125 |
| 15    | <b>5d</b>  | 0.46488      | 847.5723 | -8.532 | 166.3806 |
| 16    | <b>5e</b>  | 0.61032      | 860.5664 | -8.421 | 166.9239 |
| 17    | <b>5f</b>  | 0.48445      | 862.5449 | -8.449 | 165.7688 |
| 18    | <b>7a</b>  | 0.56002      | 750.3674 | -9.02  | 166.2438 |
| 19    | <b>7b</b>  | 0.58567      | 746.1119 | -9.012 | 166.3373 |
| 20    | <b>7c</b>  | 0.53307      | 794.0137 | -8.598 | 166.0254 |
| 21    | <b>9a</b>  | 0.61856      | 1264.514 | -8.977 | 166.522  |
| 22    | <b>9b</b>  | 0.61312      | 1116.492 | -8.556 | 165.4671 |
| 23    | <b>9c</b>  | 0.57685      | 1327.415 | -8.926 | 166.3703 |
| 24    | <b>11a</b> | 0.59535      | 753.0491 | -8.863 | 165.1865 |
| 25    | <b>11b</b> | 0.58403      | 898.7879 | -8.604 | 165.1858 |
| 26    | <b>11c</b> | 0.54741      | 898.6125 | -9.136 | 165.2384 |

|    |            |         |          |        |          |
|----|------------|---------|----------|--------|----------|
| 27 | <b>11d</b> | 0.57174 | 760.4601 | -8.531 | 164.755  |
| 28 | <b>11e</b> | 0.54952 | 852.5845 | -8.45  | 164.8389 |
| 29 | <b>11f</b> | 0.64039 | 956.7063 | -8.543 | 165.1492 |
| 30 | <b>13</b>  | 0.56125 | 757.8262 | -8.999 | 165.2432 |
| 31 | <b>15</b>  | 0.62826 | 1147.559 | -9.028 | 166.6356 |

\* $D_1$  = Partial surface area for atom H,  $D_2$  = DPSA2 difference in CPSAs (PPSA2-PNSA2) (Zefirov PC),  $D_3$  = HOMO energy,  $D_3$  = Max. e-e repulsion for bond C-N.

**Table S4.** Descriptors of the QSAR model for the tested agents against *B. subtilis*.

| Entry                                                                                                                                                                                                                                                                                                                          | ID                    | Coefficient | <i>s</i> | <i>t</i> | Descriptor                          |
|--------------------------------------------------------------------------------------------------------------------------------------------------------------------------------------------------------------------------------------------------------------------------------------------------------------------------------|-----------------------|-------------|----------|----------|-------------------------------------|
| 1                                                                                                                                                                                                                                                                                                                              | 0                     | 94.2625     | 5.572    | 16.918   | Intercept                           |
| 2                                                                                                                                                                                                                                                                                                                              | <i>D</i> <sub>1</sub> | -2.09499    | 0.542    | -3.867   | Min. total interaction for bond H-C |
| 3                                                                                                                                                                                                                                                                                                                              | <i>D</i> <sub>2</sub> | -2.13915    | 0.193    | -11.112  | Min. total interaction for bond C-C |
| 4                                                                                                                                                                                                                                                                                                                              | <i>D</i> <sub>3</sub> | -0.272268   | 0.021    | -13.130  | Max. e-e repulsion for atom N       |
| <i>N</i> = 31, <i>n</i> = 3, <i>R</i> <sup>2</sup> = 0.935, <i>R</i> <sup>2</sup> <sub>cvOO</sub> = 0.915, <i>R</i> <sup>2</sup> <sub>cvMO</sub> = 0.916, <i>F</i> = 129.818, <i>s</i> <sup>2</sup> = 0.024<br>$\log(\text{MIC}, \mu\text{M}) = 94.2625 - (2.09499 \times D_1) - (2.13915 \times D_2) - (0.272268 \times D_3)$ |                       |             |          |          |                                     |

**Table S5.** Observed and estimated antimicrobial properties for the tested compounds agents against *B. subtilis* according to the BMLR-QSAR model.

| Entry | Compd.     | log(observed MIC, $\mu$ M) | Observed MIC, $\mu$ M | log(estimated MIC, $\mu$ M) | Estimated MIC, $\mu$ M | Error*  |
|-------|------------|----------------------------|-----------------------|-----------------------------|------------------------|---------|
| 1     | <b>3a</b>  | 0.914977                   | 8.222                 | 0.97142                     | 9.363                  | -1.141  |
| 2     | <b>3b</b>  | 1.80572                    | 63.932                | 1.62406                     | 42.078                 | 21.854  |
| 3     | <b>3c</b>  | 1.78204                    | 60.54                 | 1.86703                     | 73.626                 | -13.086 |
| 4     | <b>3d</b>  | 1.75647                    | 57.078                | 1.99012                     | 97.751                 | -40.673 |
| 5     | <b>3e</b>  | 1.74425                    | 55.495                | 1.81555                     | 65.396                 | -9.901  |
| 6     | <b>3f</b>  | 1.24748                    | 17.68                 | 0.960204                    | 9.124                  | 8.556   |
| 7     | <b>3g</b>  | 1.83629                    | 68.594                | 1.94528                     | 88.162                 | -19.568 |
| 8     | <b>3h</b>  | 1.81093                    | 64.704                | 1.62283                     | 41.959                 | 22.745  |
| 9     | <b>3i</b>  | 1.78365                    | 60.765                | 1.60249                     | 40.040                 | 20.725  |
| 10    | <b>3j</b>  | 1.77066                    | 58.974                | 1.92266                     | 83.687                 | -24.713 |
| 11    | <b>3k</b>  | 1.79878                    | 62.919                | 1.8159                      | 65.449                 | -2.530  |
| 12    | <b>5a</b>  | 0.398634                   | 2.504                 | 0.61845                     | 4.154                  | -1.650  |
| 13    | <b>5b</b>  | 0.379487                   | 2.396                 | 0.470247                    | 2.953                  | -0.557  |
| 14    | <b>5c</b>  | 0.663701                   | 4.61                  | 0.59618                     | 3.946                  | 0.664   |
| 15    | <b>5d</b>  | 0.352183                   | 2.25                  | 0.525078                    | 3.350                  | -1.100  |
| 16    | <b>5e</b>  | 0.368101                   | 2.334                 | 0.482452                    | 3.037                  | -0.703  |
| 17    | <b>5f</b>  | 0.921842                   | 8.353                 | 0.758413                    | 5.733                  | 2.620   |
| 18    | <b>7a</b>  | 0.698535                   | 4.995                 | 0.664147                    | 4.615                  | 0.380   |
| 19    | <b>7b</b>  | 0.698535                   | 4.995                 | 0.699902                    | 5.011                  | -0.016  |
| 20    | <b>7c</b>  | 0.697491                   | 4.983                 | 0.755404                    | 5.694                  | -0.711  |
| 21    | <b>9a</b>  | 1.79371                    | 62.189                | 1.53791                     | 34.507                 | 27.682  |
| 22    | <b>9b</b>  | 1.80572                    | 63.932                | 1.75933                     | 57.455                 | 6.477   |
| 23    | <b>9c</b>  | 1.76591                    | 58.332                | 1.74688                     | 55.832                 | 2.500   |
| 24    | <b>11a</b> | 1.89938                    | 79.32                 | 1.77818                     | 60.004                 | 19.316  |
| 25    | <b>11b</b> | 1.83908                    | 69.037                | 1.79938                     | 63.006                 | 6.031   |
| 26    | <b>11c</b> | 1.5476                     | 35.286                | 1.77752                     | 59.913                 | -24.627 |

|    |            |         |        |         |        |         |
|----|------------|---------|--------|---------|--------|---------|
| 27 | <b>11d</b> | 1.88202 | 76.212 | 1.94775 | 88.665 | -12.453 |
| 28 | <b>11e</b> | 1.88044 | 75.934 | 1.97908 | 95.297 | -19.363 |
| 29 | <b>11f</b> | 1.85631 | 71.831 | 1.75066 | 56.320 | 15.511  |
| 30 | <b>13</b>  | 1.90484 | 80.323 | 1.68596 | 48.524 | 31.799  |
| 31 | <b>15</b>  | 1.78781 | 61.349 | 1.92212 | 83.583 | -22.234 |

\*Error is the difference between the observed and estimated property (MIC,  $\mu$ M).

**Table S6.** Molecular descriptor values of the QSAR model for the tested compounds against *B. subtilis*.

| Entry | Compd.     | Descriptors <sup>*</sup> |                       |                       |
|-------|------------|--------------------------|-----------------------|-----------------------|
|       |            | <i>D</i> <sub>1</sub>    | <i>D</i> <sub>2</sub> | <i>D</i> <sub>3</sub> |
| 1     | <b>3a</b>  | 11.9931                  | 13.6296               | 143.2774              |
| 2     | <b>3b</b>  | 11.9319                  | 13.1962               | 144.7564              |
| 3     | <b>3c</b>  | 11.9393                  | 13.1742               | 143.9799              |
| 4     | <b>3d</b>  | 11.8739                  | 13.2499               | 143.4363              |
| 5     | <b>3e</b>  | 11.982                   | 13.2244               | 143.446               |
| 6     | <b>3f</b>  | 12.037                   | 13.5018               | 143.9849              |
| 7     | <b>3g</b>  | 11.9303                  | 13.1653               | 143.8317              |
| 8     | <b>3h</b>  | 11.9719                  | 13.2406               | 144.1043              |
| 9     | <b>3i</b>  | 11.9889                  | 13.242                | 144.0372              |
| 10    | <b>3j</b>  | 11.9032                  | 13.2262               | 143.6448              |
| 11    | <b>3k</b>  | 11.904                   | 13.1915               | 144.3034              |
| 12    | <b>5a</b>  | 12.0614                  | 13.6487               | 143.8982              |
| 13    | <b>5b</b>  | 12.0794                  | 13.6499               | 144.2946              |
| 14    | <b>5c</b>  | 12.0608                  | 13.6514               | 143.9634              |
| 15    | <b>5d</b>  | 12.0765                  | 13.6532               | 144.0896              |
| 16    | <b>5e</b>  | 12.0354                  | 13.635                | 144.7054              |
| 17    | <b>5f</b>  | 12.0674                  | 13.6468               | 143.3529              |
| 18    | <b>7a</b>  | 12.0582                  | 13.6432               | 143.7982              |
| 19    | <b>7b</b>  | 12.0488                  | 13.6271               | 143.8657              |
| 20    | <b>7c</b>  | 12.0598                  | 13.6459               | 143.4295              |
| 21    | <b>9a</b>  | 11.9042                  | 13.3264               | 144.263               |
| 22    | <b>9b</b>  | 11.8112                  | 13.4505               | 143.1903              |
| 23    | <b>9c</b>  | 11.9185                  | 13.252                | 143.97                |
| 24    | <b>11a</b> | 12.0122                  | 13.6386               | 140.0966              |
| 25    | <b>11b</b> | 11.9892                  | 13.6664               | 139.9773              |
| 26    | <b>11c</b> | 12.0073                  | 13.651                | 140.0393              |

|    |            |         |         |          |
|----|------------|---------|---------|----------|
| 27 | <b>11d</b> | 11.9629 | 13.6425 | 139.8225 |
| 28 | <b>11e</b> | 11.9663 | 13.637  | 139.7245 |
| 29 | <b>11f</b> | 12.0011 | 13.6443 | 140.2383 |
| 30 | <b>13</b>  | 12.0378 | 13.5998 | 140.5432 |
| 31 | <b>15</b>  | 12.0412 | 12.9446 | 144.7974 |

\* $D_1$  = Min. total interaction for bond H-C,  $D_2$  = Min. total interaction for bond C-C,  $D_3$  = Max. e-e repulsion for atom N.

**Table S7.** Observed and estimated activity values for the tested compounds against *S. aureus* according to the 3D-pharmacophore model.

| Entry | Compd.     | Observed log(MIC, $\mu$ M) | Estimated log(MIC, $\mu$ M) | Fit value |
|-------|------------|----------------------------|-----------------------------|-----------|
| 1     | <b>3a</b>  | 1.51704                    | 1.84098                     | 5.6784    |
| 2     | <b>3b</b>  | 1.80572                    | 1.88449                     | 5.6682    |
| 3     | <b>3c</b>  | 1.78204                    | 1.37375                     | 5.8055    |
| 4     | <b>3d</b>  | 1.75647                    | 2.01402                     | 5.6393    |
| 5     | <b>3e</b>  | 1.74425                    | 1.7901                      | 5.6905    |
| 6     | <b>3f</b>  | 1.84955                    | 1.74855                     | 5.7007    |
| 7     | <b>3g</b>  | 1.83629                    | 1.78017                     | 5.6929    |
| 8     | <b>3h</b>  | 1.81093                    | 1.57704                     | 5.7456    |
| 9     | <b>3i</b>  | 1.78365                    | 1.58182                     | 5.7442    |
| 10    | <b>3j</b>  | 2.07169                    | 2.19801                     | 5.6014    |
| 11    | <b>3k</b>  | 1.79878                    | 1.53599                     | 5.7570    |
| 12    | <b>5a</b>  | 1.00065                    | 1.23937                     | 5.8502    |
| 13    | <b>5b</b>  | 0.98150                    | 1.37555                     | 5.8049    |
| 14    | <b>5c</b>  | 1.26574                    | 1.50804                     | 5.7650    |
| 15    | <b>5d</b>  | 0.65321                    | 1.18984                     | 5.8679    |
| 16    | <b>5e</b>  | 0.97016                    | 1.30382                     | 5.8282    |
| 17    | <b>5f</b>  | 1.22287                    | 1.61247                     | 5.7359    |
| 18    | <b>7a</b>  | 1.30060                    | 1.30122                     | 5.8291    |
| 19    | <b>7b</b>  | 1.30060                    | 1.28669                     | 5.8339    |
| 20    | <b>7c</b>  | 1.29951                    | 1.20052                     | 5.8640    |
| 21    | <b>9a</b>  | 1.79371                    | 2.14546                     | 5.6119    |
| 22    | <b>9b</b>  | 1.80572                    | 2.09218                     | 5.6228    |
| 23    | <b>9c</b>  | 1.76591                    | 1.6994                      | 5.7131    |
| 24    | <b>11a</b> | 1.89938                    | 1.29709                     | 5.8304    |
| 25    | <b>11b</b> | 1.83908                    | 1.60747                     | 5.7373    |
| 26    | <b>11c</b> | 1.84863                    | 1.35055                     | 5.8129    |



|    |            |         |         |        |
|----|------------|---------|---------|--------|
| 27 | <b>11d</b> | 1.88202 | 1.31817 | 5.8234 |
| 28 | <b>11e</b> | 1.88044 | 1.64403 | 5.7275 |
| 29 | <b>11f</b> | 1.85631 | 1.4571  | 5.7799 |
| 30 | <b>13</b>  | 1.90484 | 1.64206 | 5.7280 |
| 31 | <b>15</b>  | 1.78781 | 1.56436 | 5.7491 |

**Table S8.** Observed and estimated activity values for the tested compounds against *B. subtilis* according to the 3D-pharmacophore model.

| Entry | Compd.     | Observed log(MIC, $\mu$ M) | Estimated log(MIC, $\mu$ M) | Fit value |
|-------|------------|----------------------------|-----------------------------|-----------|
| 1     | <b>3a</b>  | 0.91498                    | 0.75804                     | 6.5619    |
| 2     | <b>3b</b>  | 1.80572                    | 0.81487                     | 6.5305    |
| 3     | <b>3c</b>  | 1.78204                    | 1.33123                     | 6.3174    |
| 4     | <b>3d</b>  | 1.75647                    | 1.09856                     | 6.4008    |
| 5     | <b>3e</b>  | 1.74425                    | 2.36054                     | 6.0686    |
| 6     | <b>3f</b>  | 1.24748                    | 1.50589                     | 6.2638    |
| 7     | <b>3g</b>  | 1.83629                    | 2.10012                     | 6.1194    |
| 8     | <b>3h</b>  | 1.81093                    | 1.36447                     | 6.3066    |
| 9     | <b>3i</b>  | 1.78365                    | 1.14237                     | 6.3838    |
| 10    | <b>3j</b>  | 1.77066                    | 1.71941                     | 6.2062    |
| 11    | <b>3k</b>  | 1.79878                    | 1.88041                     | 6.1674    |
| 12    | <b>5a</b>  | 0.39863                    | 0.65381                     | 6.6262    |
| 13    | <b>5b</b>  | 0.37949                    | 0.72662                     | 6.5803    |
| 14    | <b>5c</b>  | 0.66370                    | 1.15583                     | 6.3787    |
| 15    | <b>5d</b>  | 0.35218                    | 0.57343                     | 6.6831    |
| 16    | <b>5e</b>  | 0.36810                    | 0.32045                     | 6.9359    |
| 17    | <b>5f</b>  | 0.92184                    | 0.80520                     | 6.5357    |
| 18    | <b>7a</b>  | 0.69854                    | 1.37928                     | 6.3020    |
| 19    | <b>7b</b>  | 0.69854                    | 0.67930                     | 6.6095    |
| 20    | <b>7c</b>  | 0.69749                    | 1.02594                     | 6.4305    |
| 21    | <b>9a</b>  | 1.79371                    | 1.27904                     | 6.3347    |
| 22    | <b>9b</b>  | 1.80572                    | 2.08334                     | 6.1228    |
| 23    | <b>9c</b>  | 1.76591                    | 1.16705                     | 6.3745    |
| 24    | <b>11a</b> | 1.89938                    | 1.83034                     | 6.1791    |
| 25    | <b>11b</b> | 1.83908                    | 2.08298                     | 6.1229    |
| 26    | <b>11c</b> | 1.54760                    | 2.25552                     | 6.0884    |

|    |            |         |         |        |
|----|------------|---------|---------|--------|
| 27 | <b>11d</b> | 1.88202 | 2.85518 | 5.9860 |
| 28 | <b>11e</b> | 1.88044 | 1.03876 | 6.4251 |
| 29 | <b>11f</b> | 1.85631 | 1.24322 | 6.3471 |
| 30 | <b>13</b>  | 1.90484 | 1.49658 | 6.2665 |
| 31 | <b>15</b>  | 1.78781 | 1.45831 | 6.2778 |

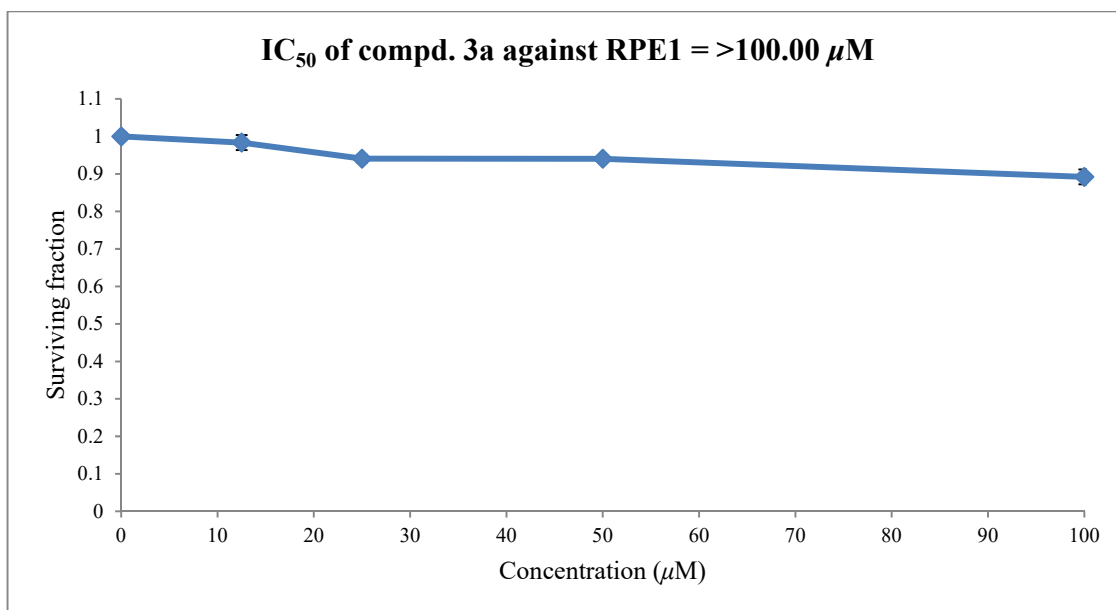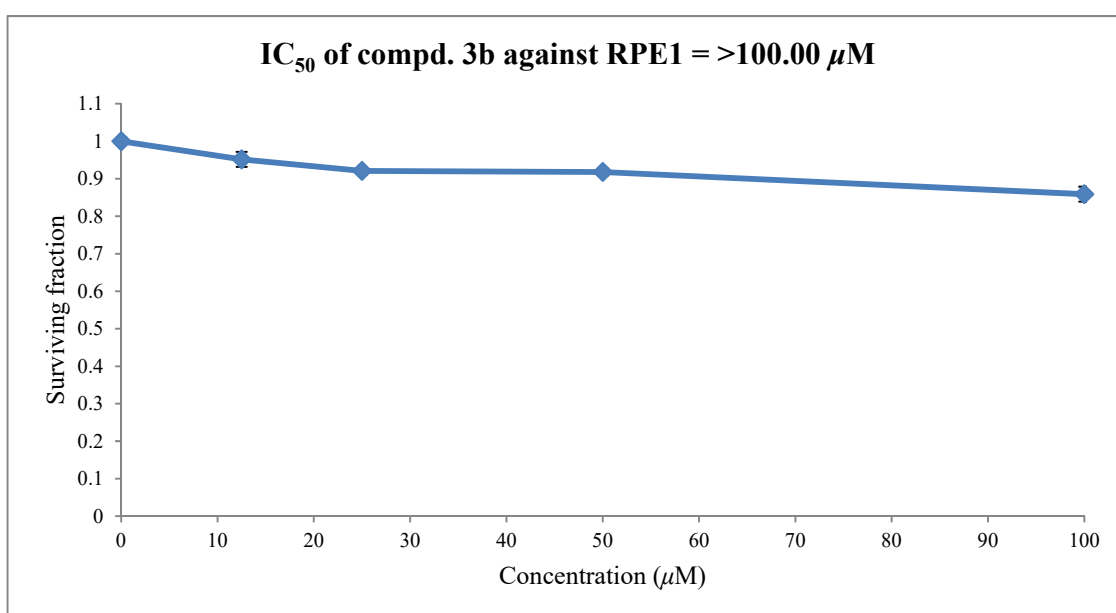

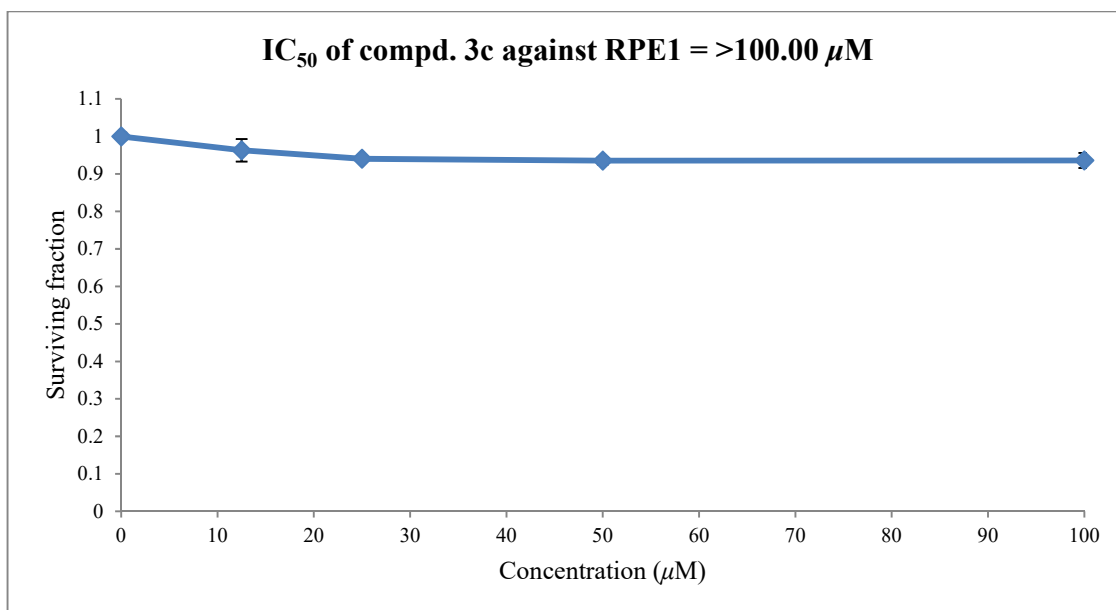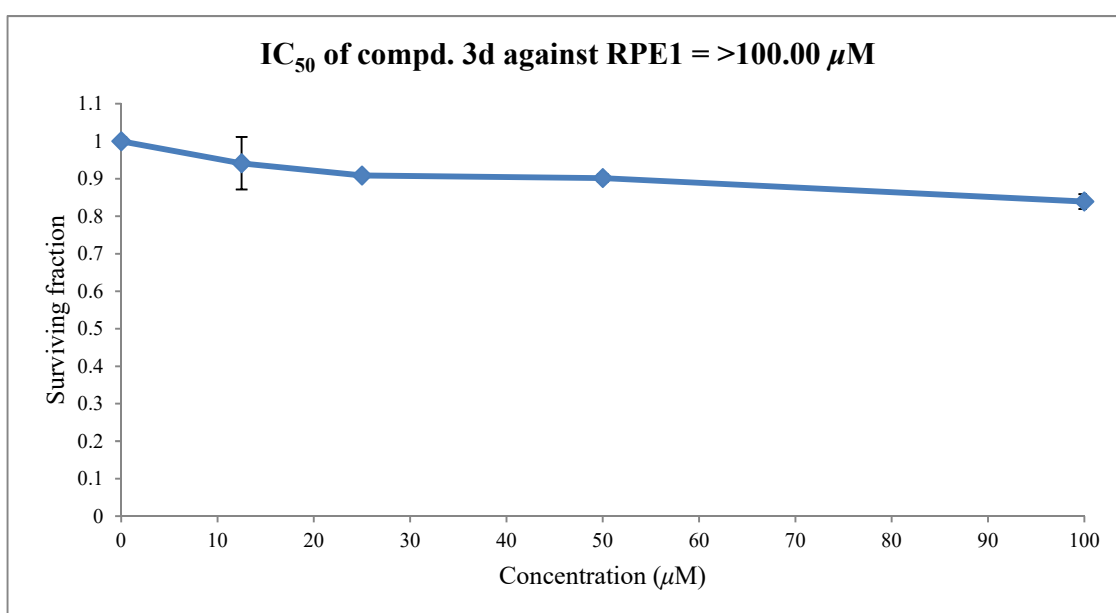

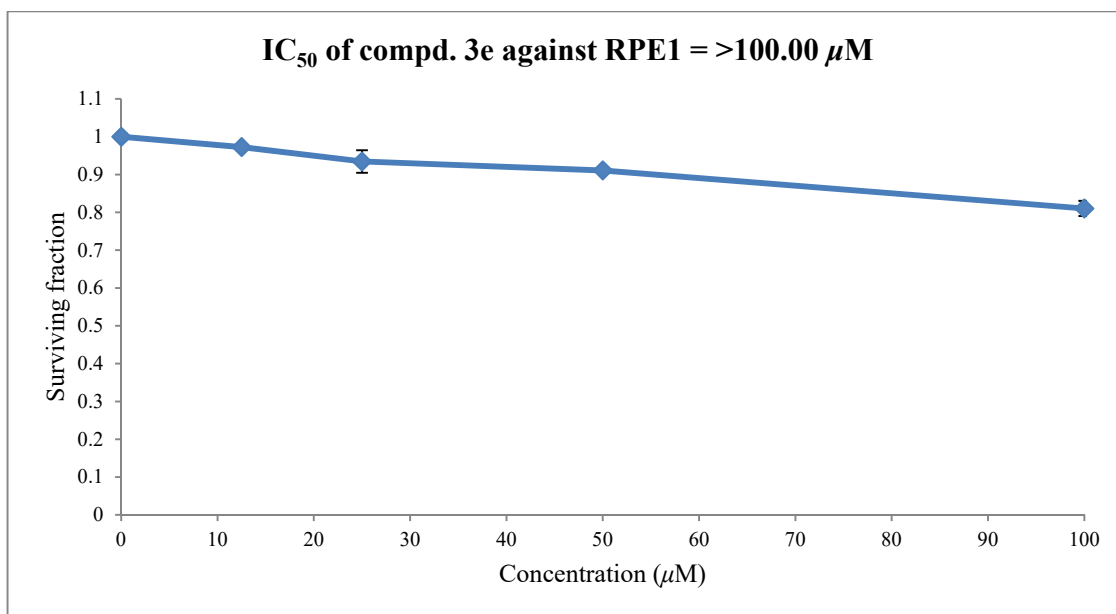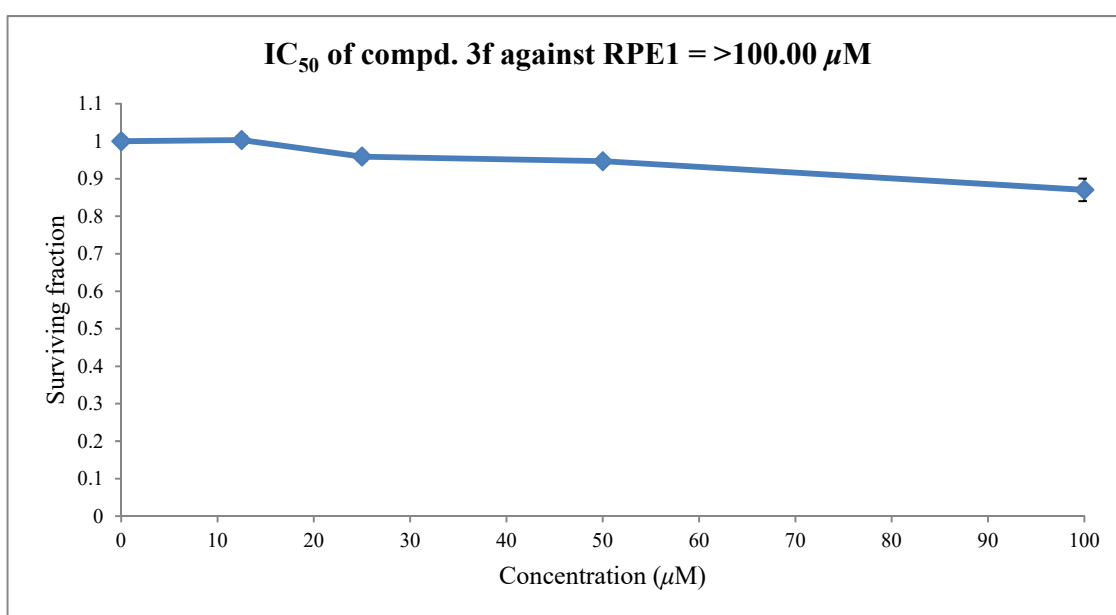

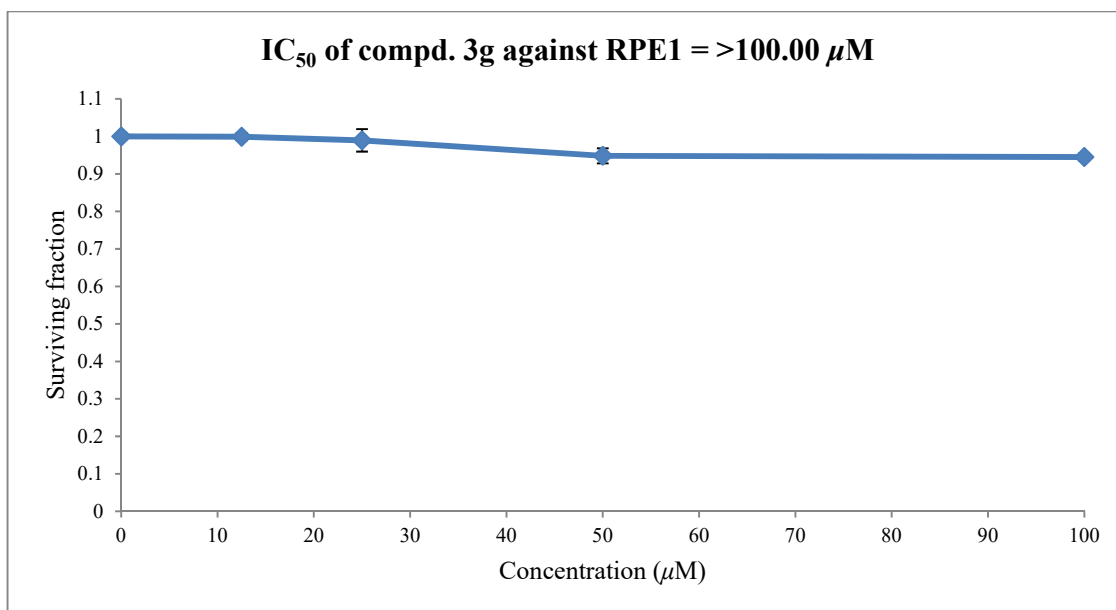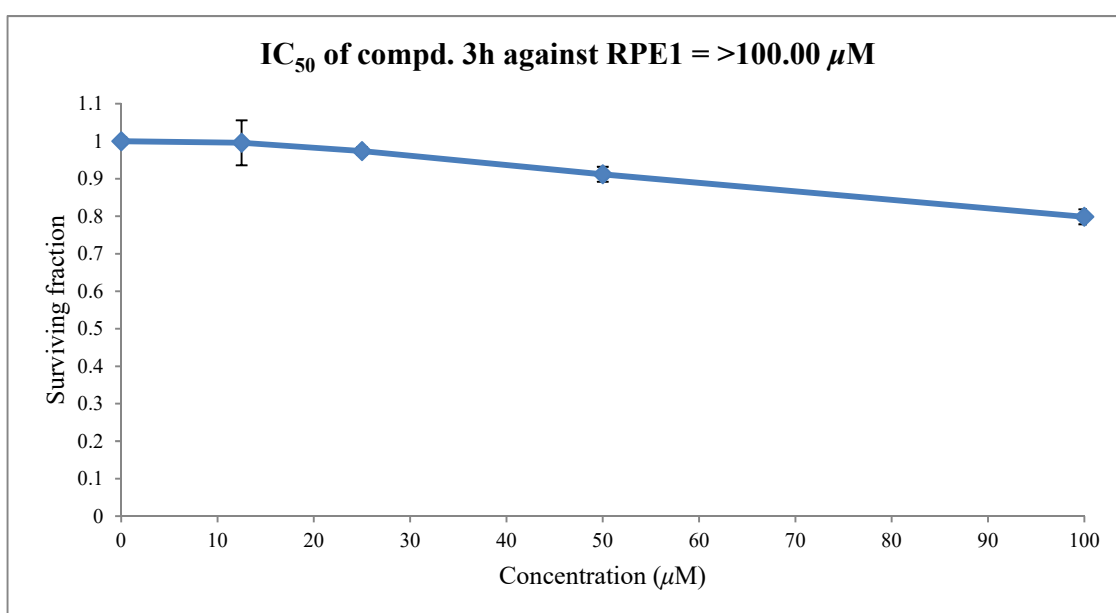

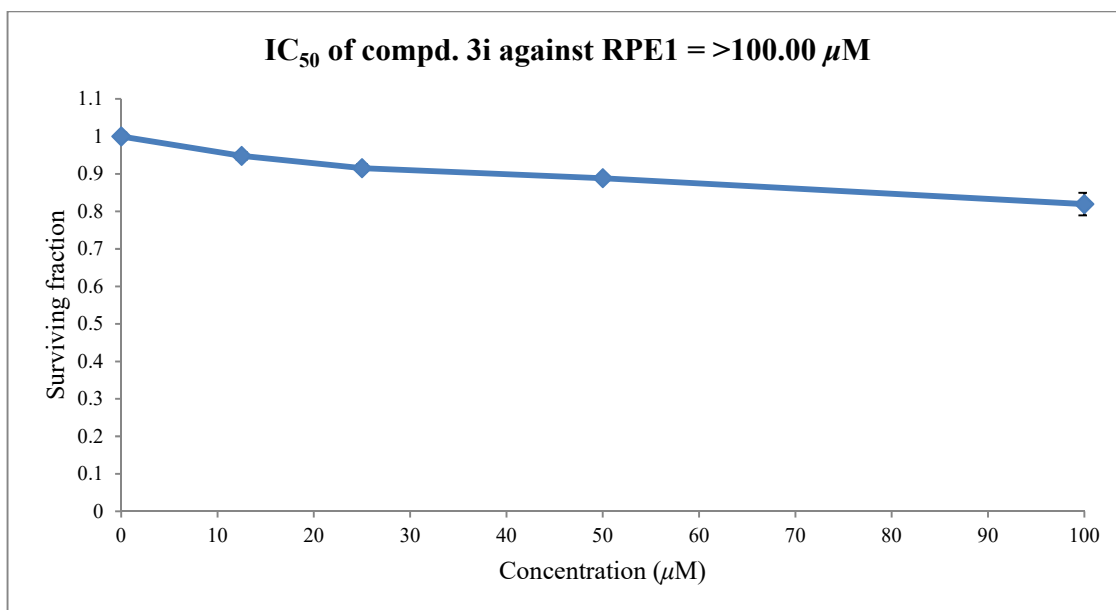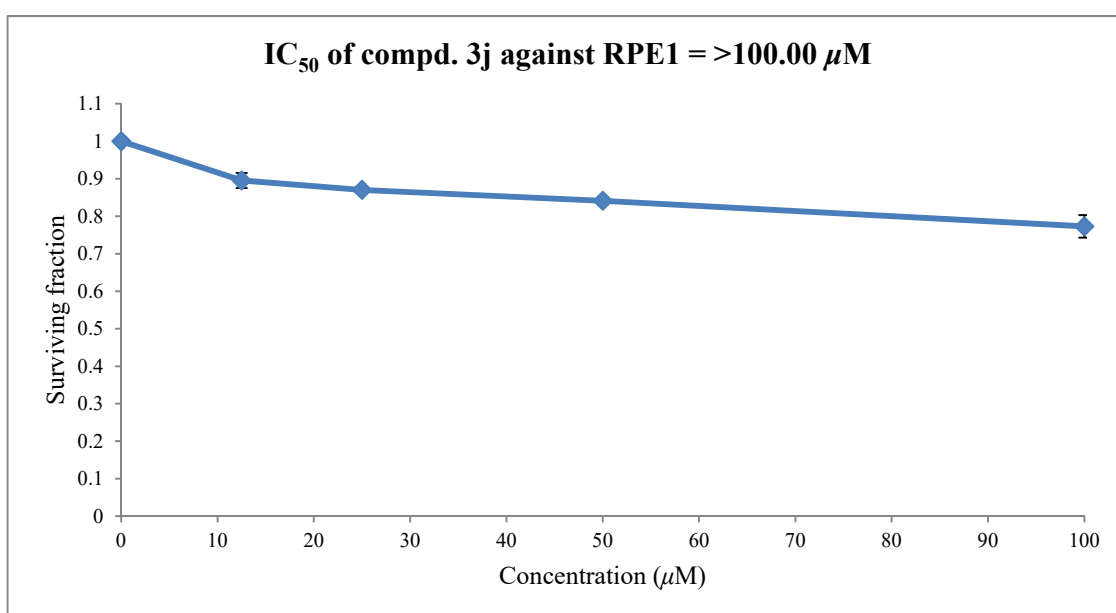



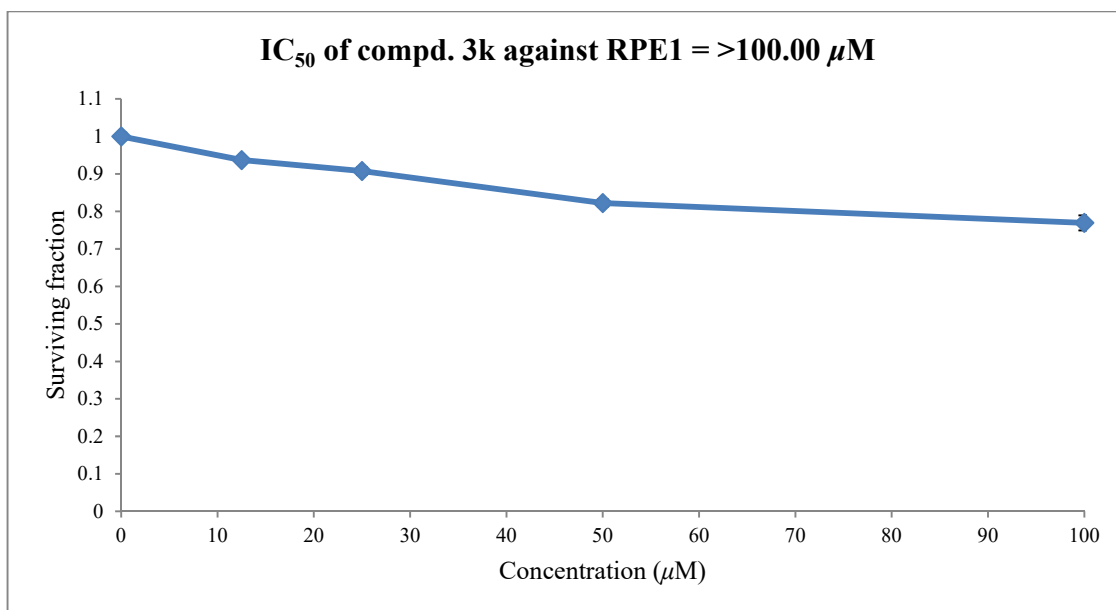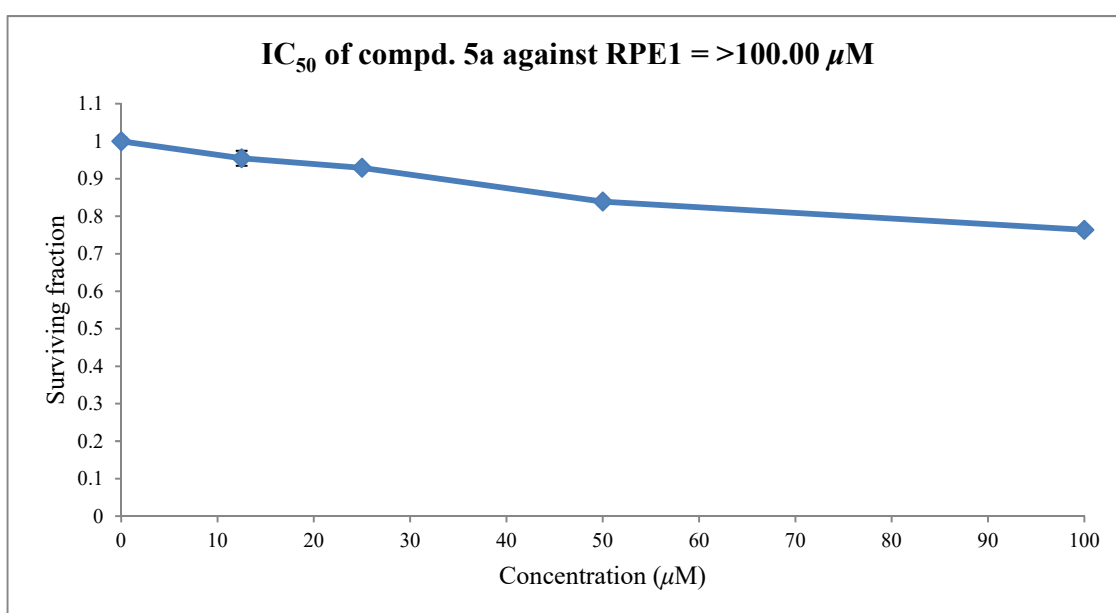

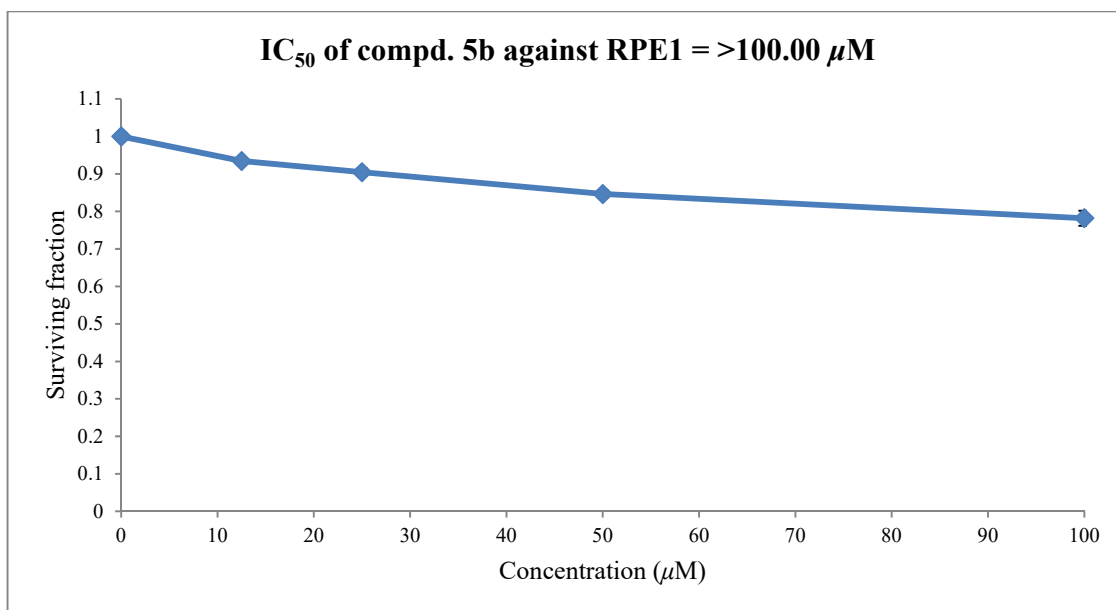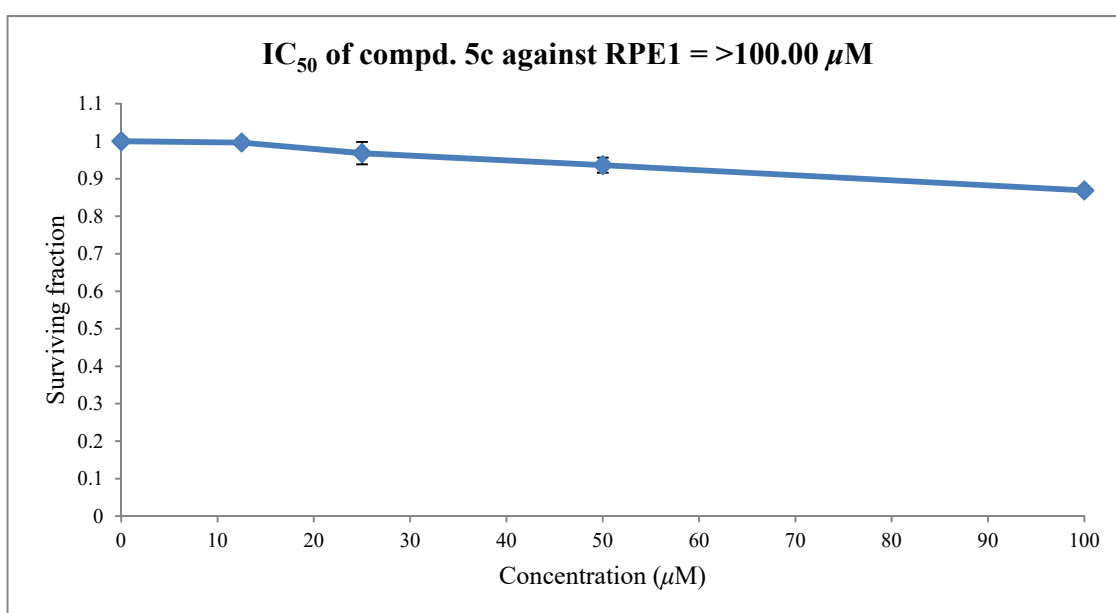

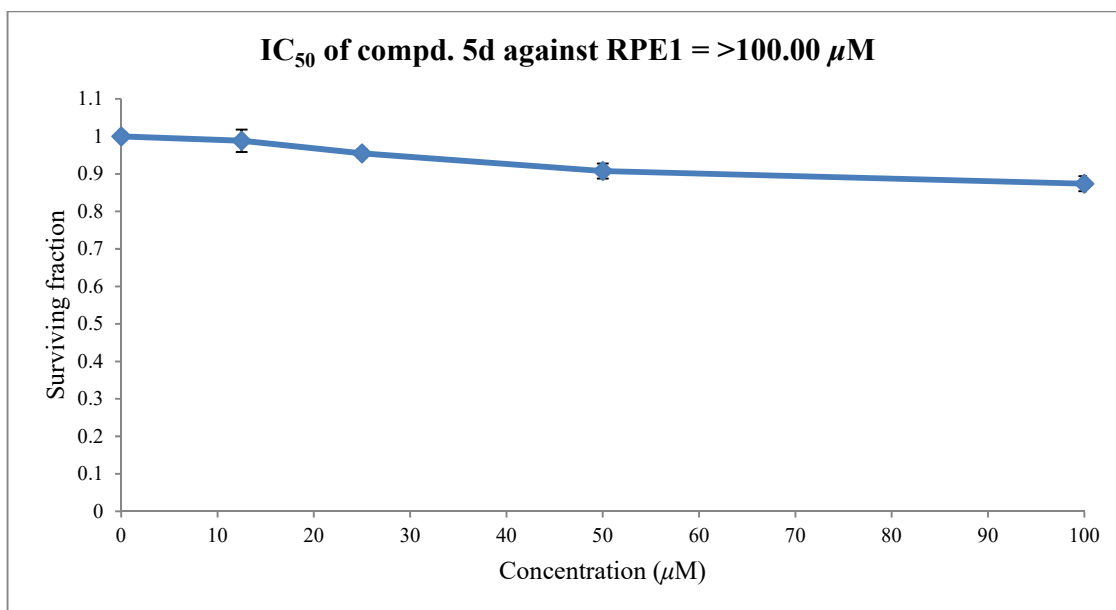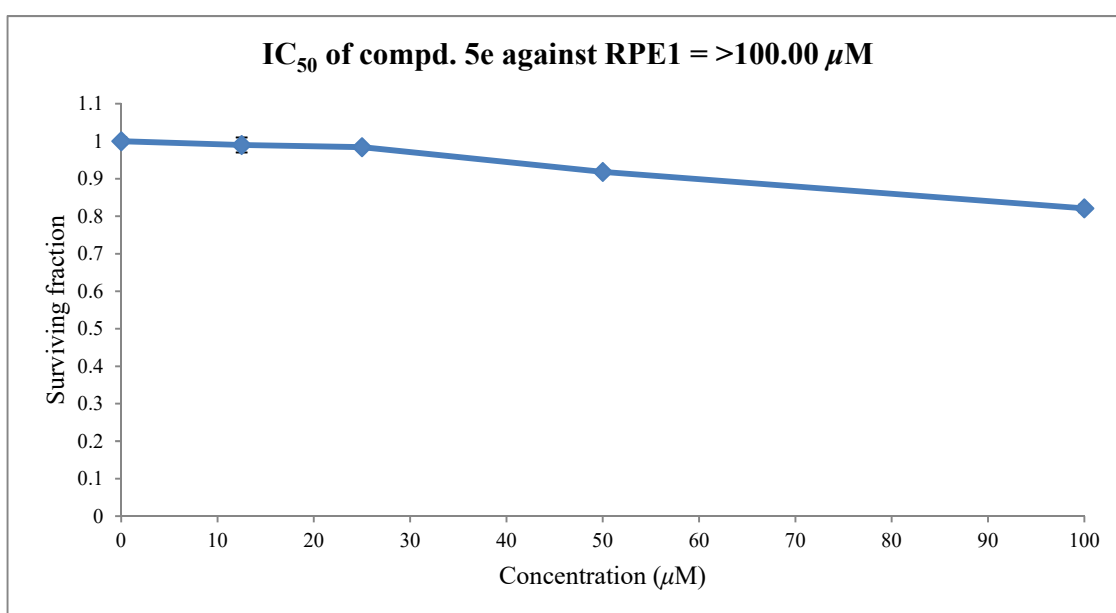

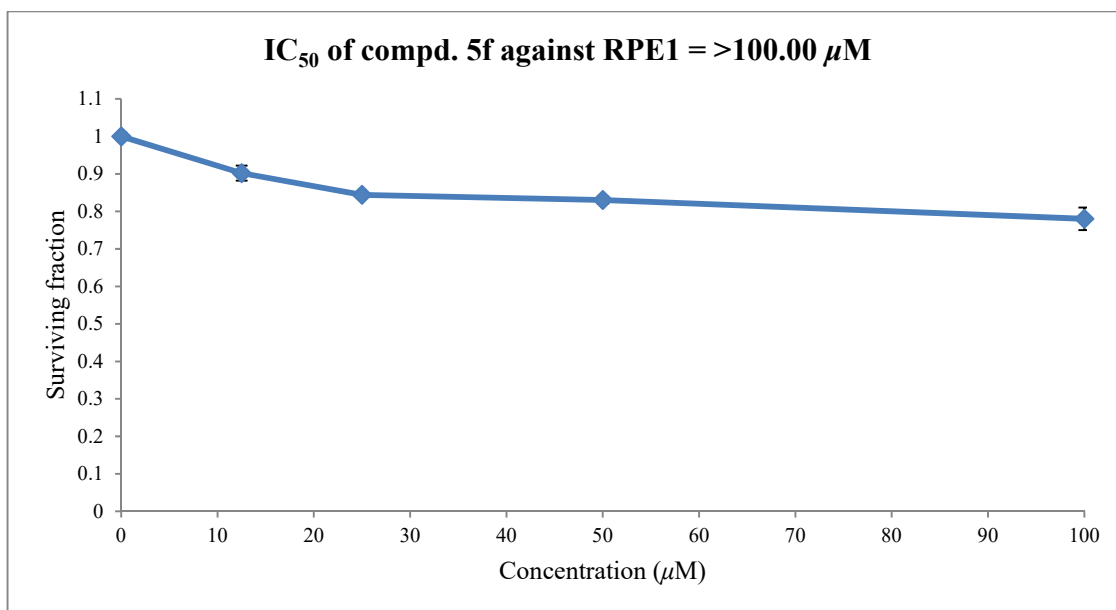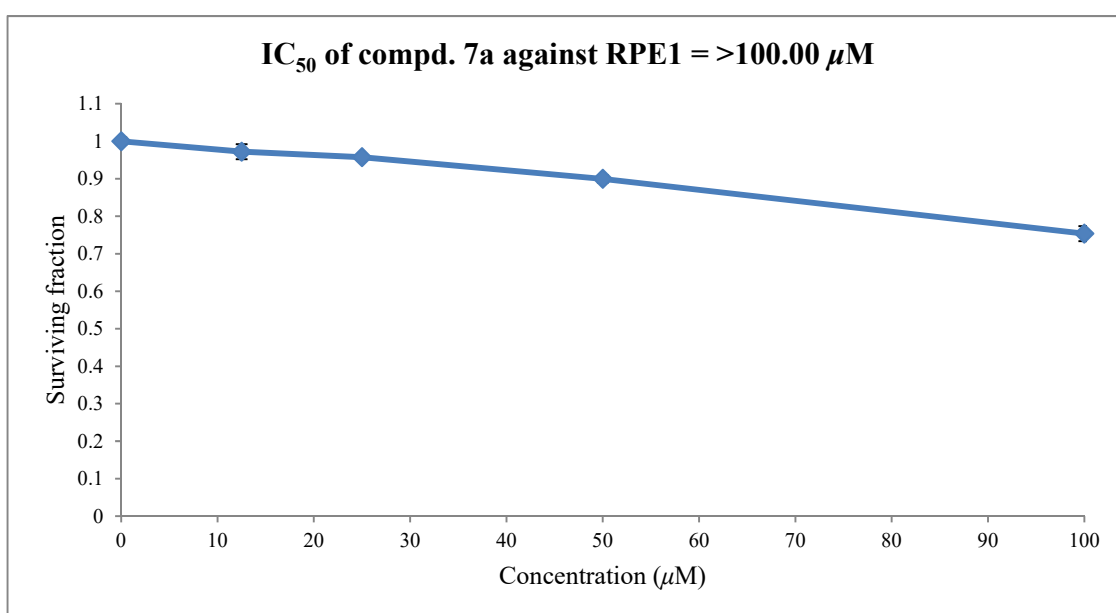

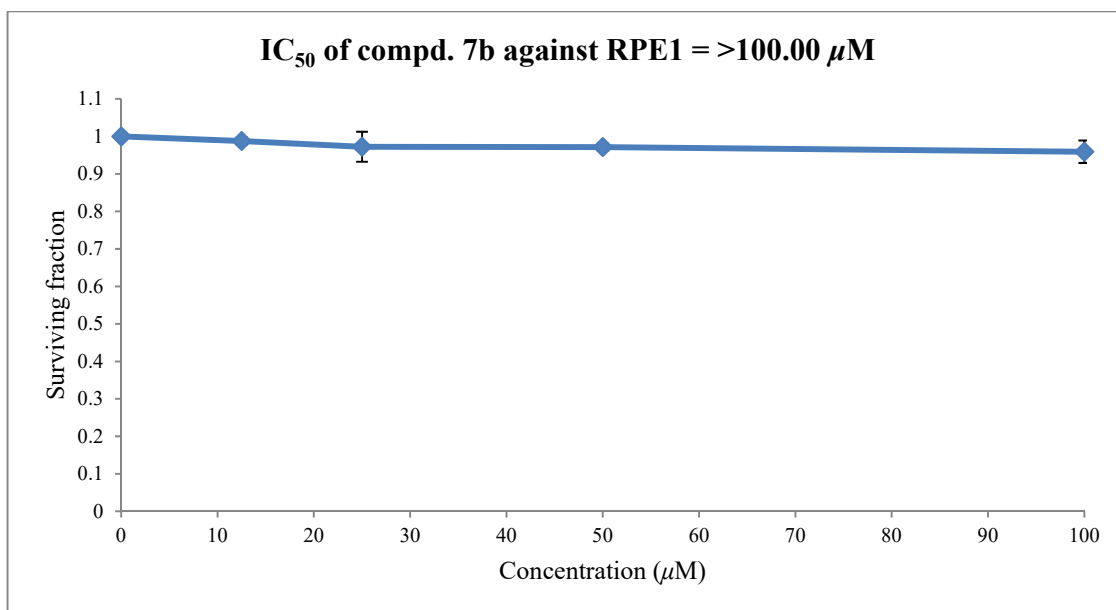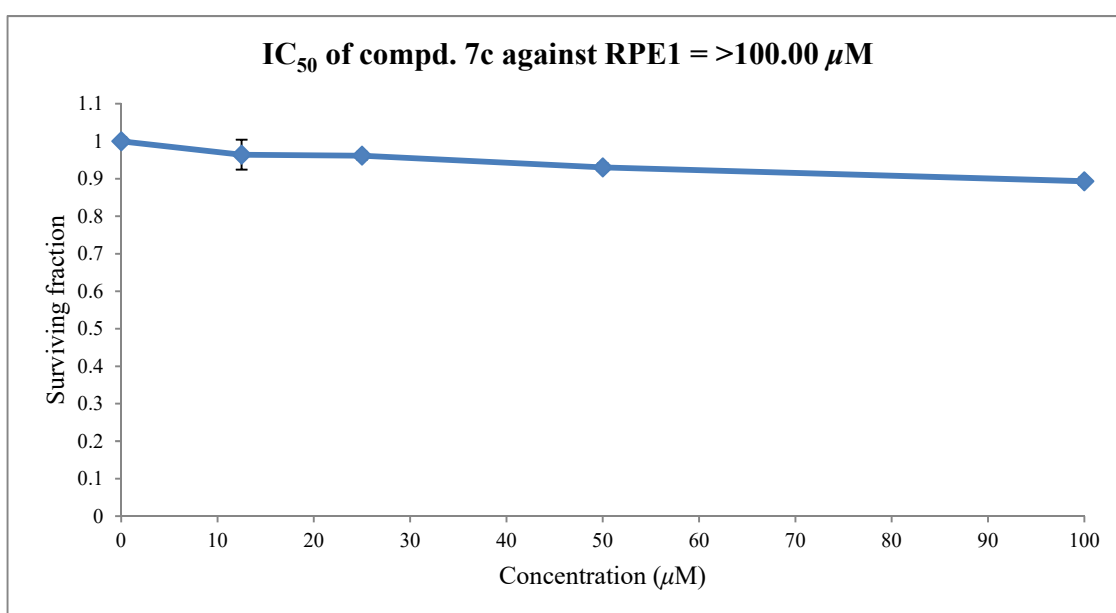

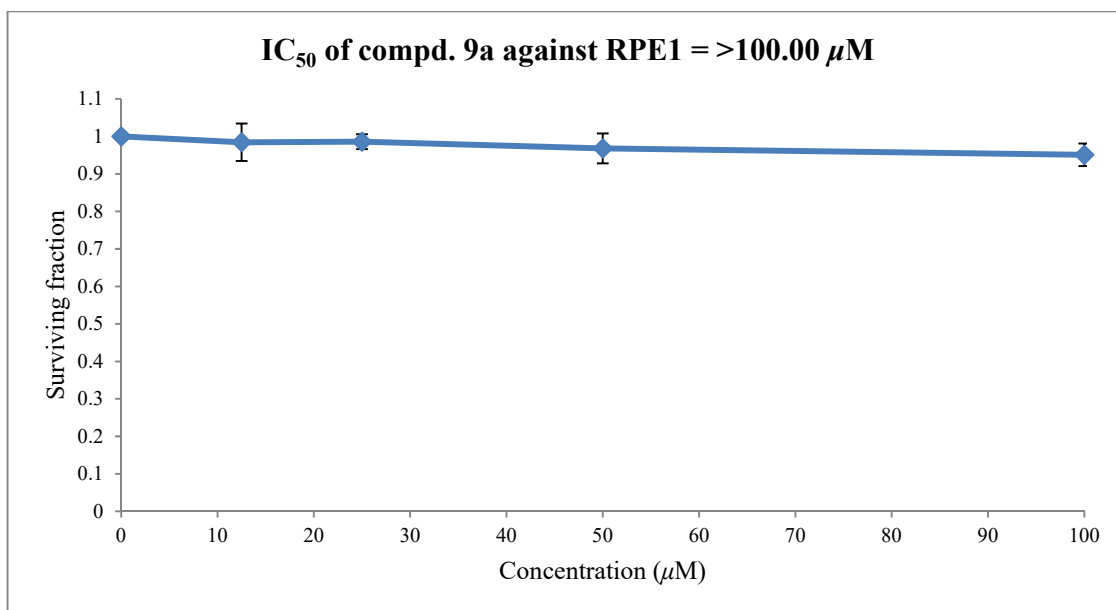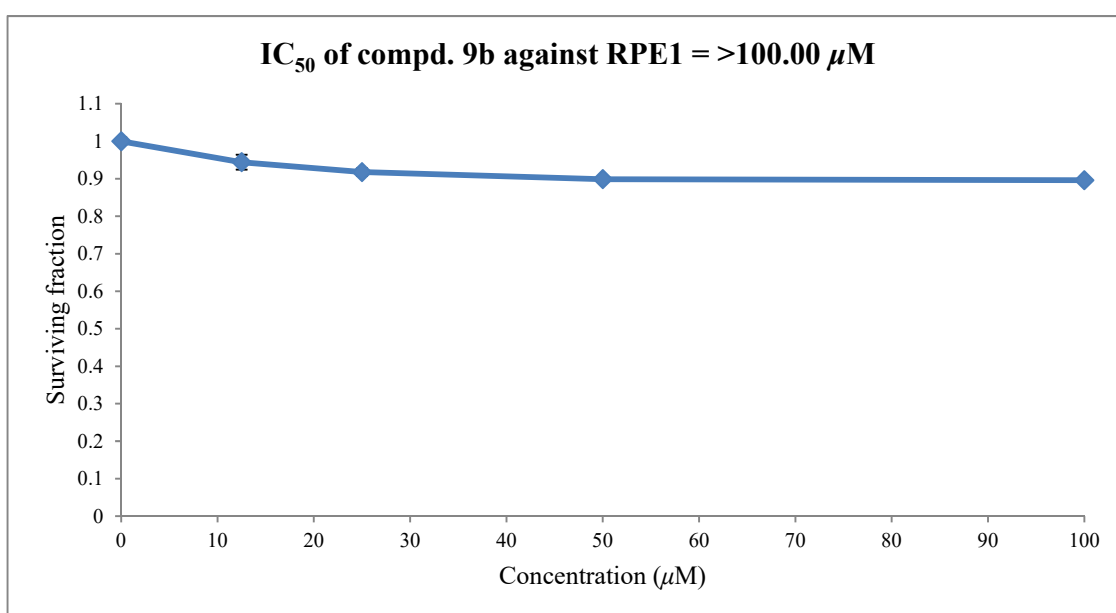

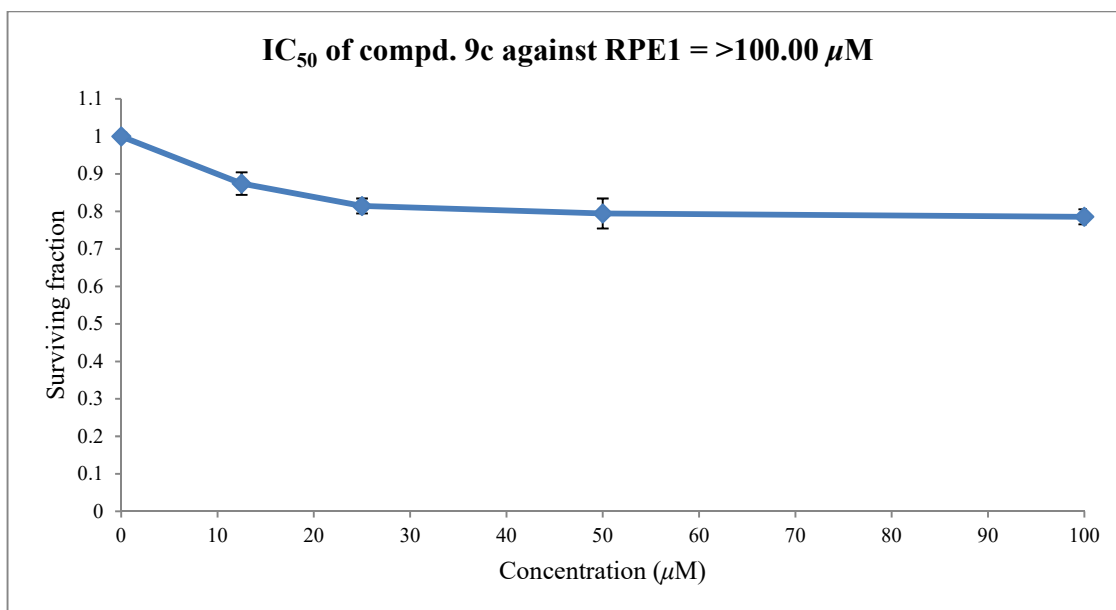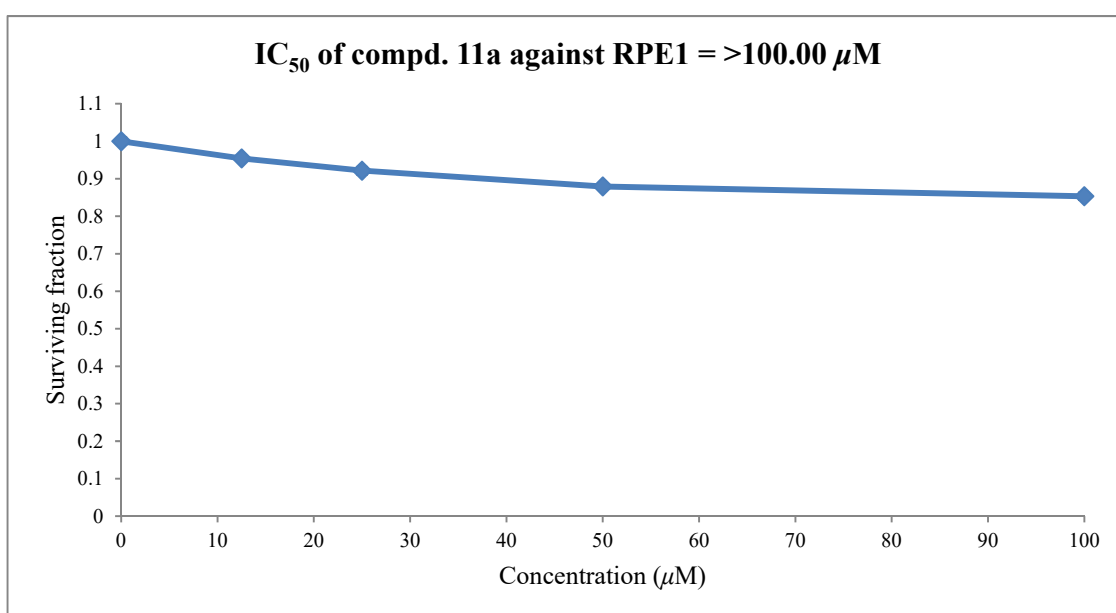

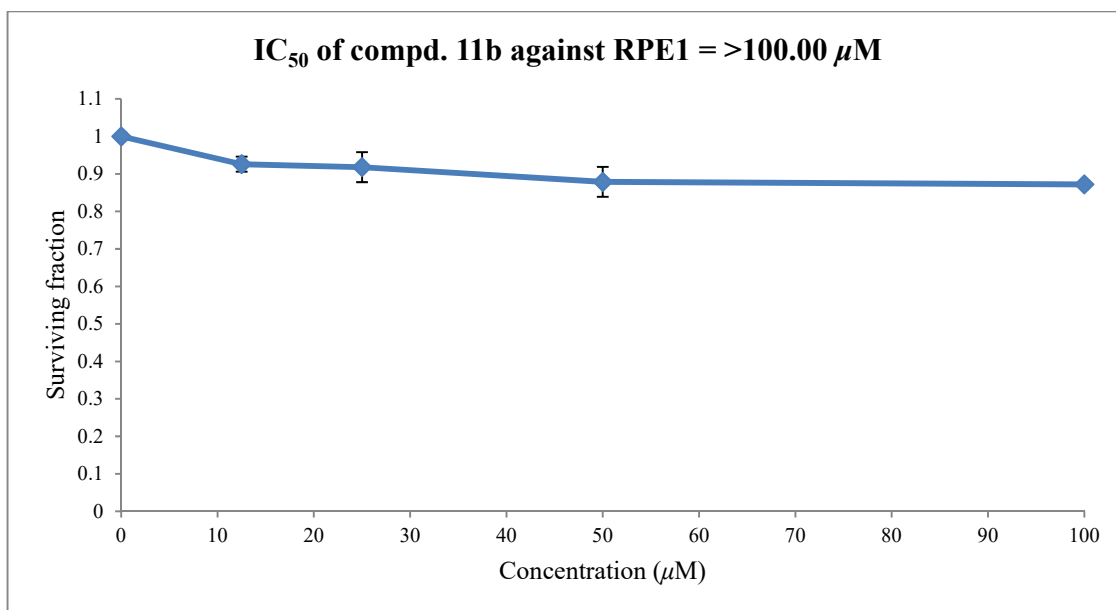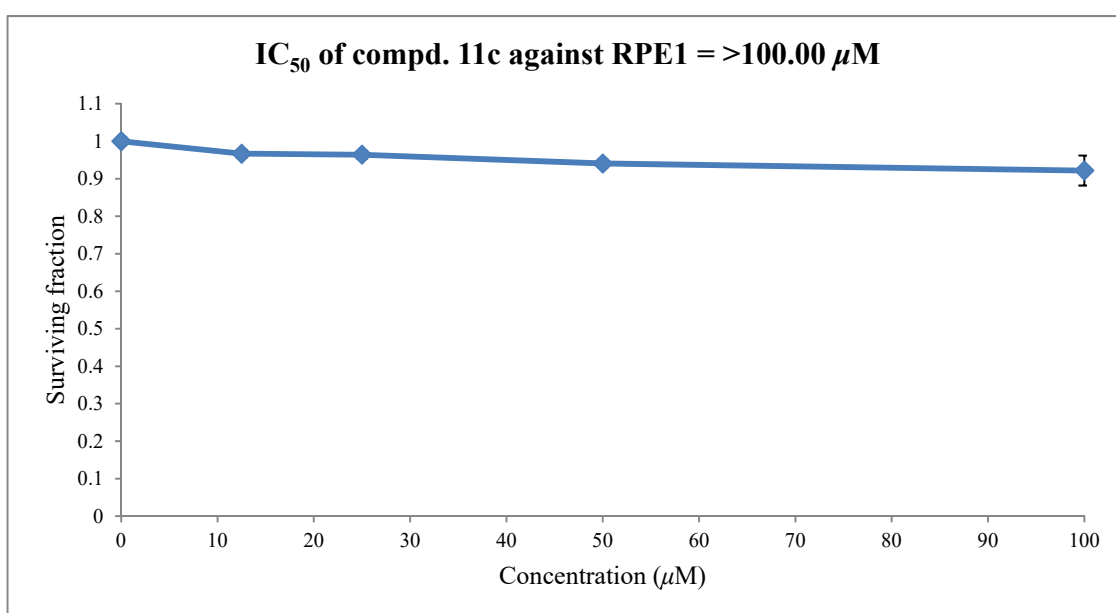



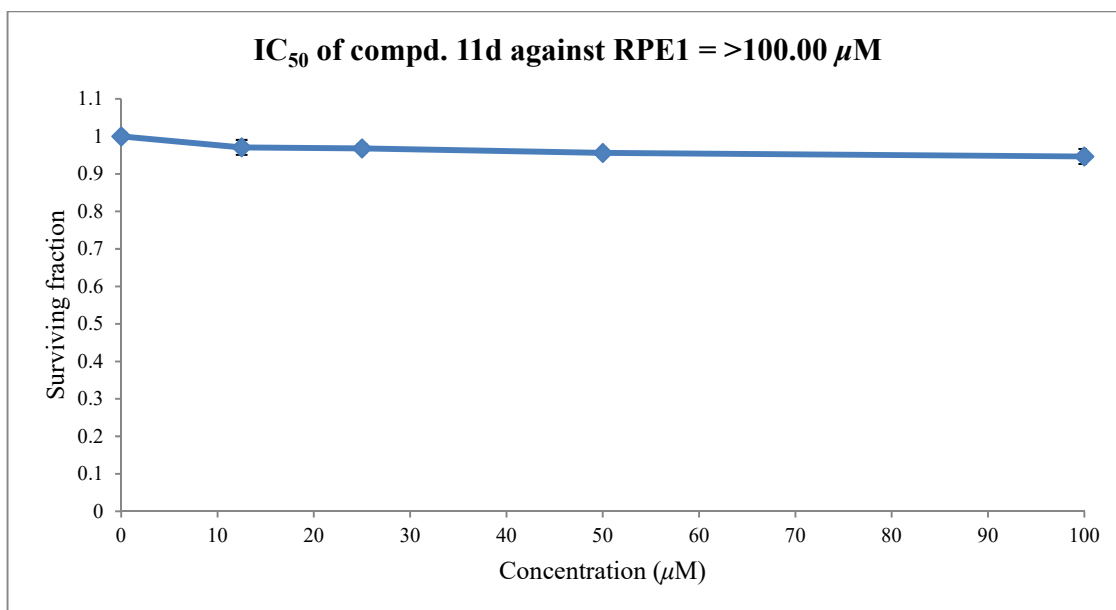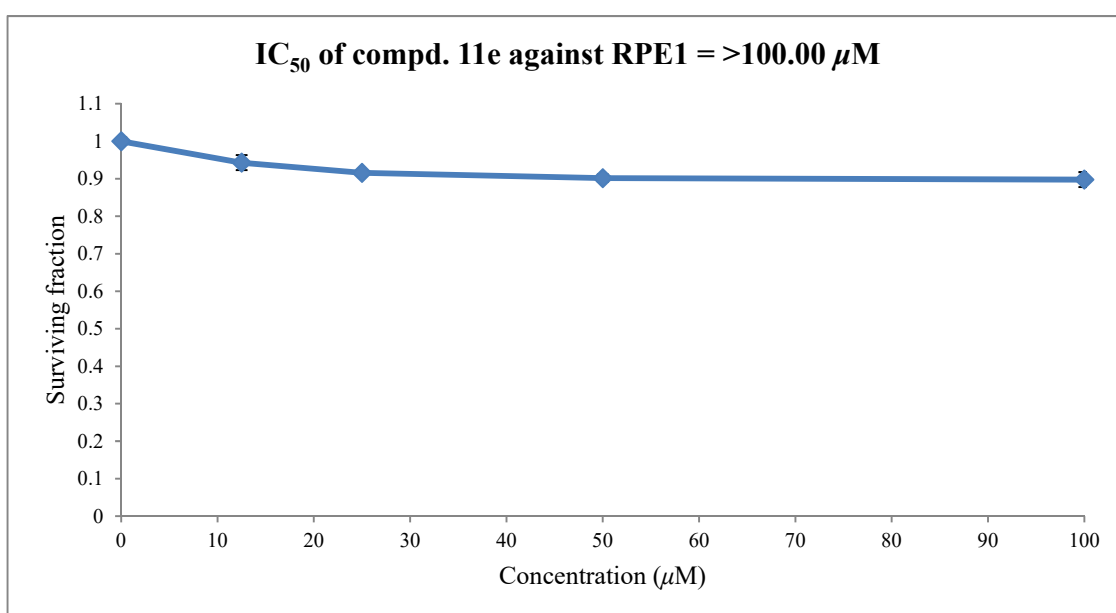

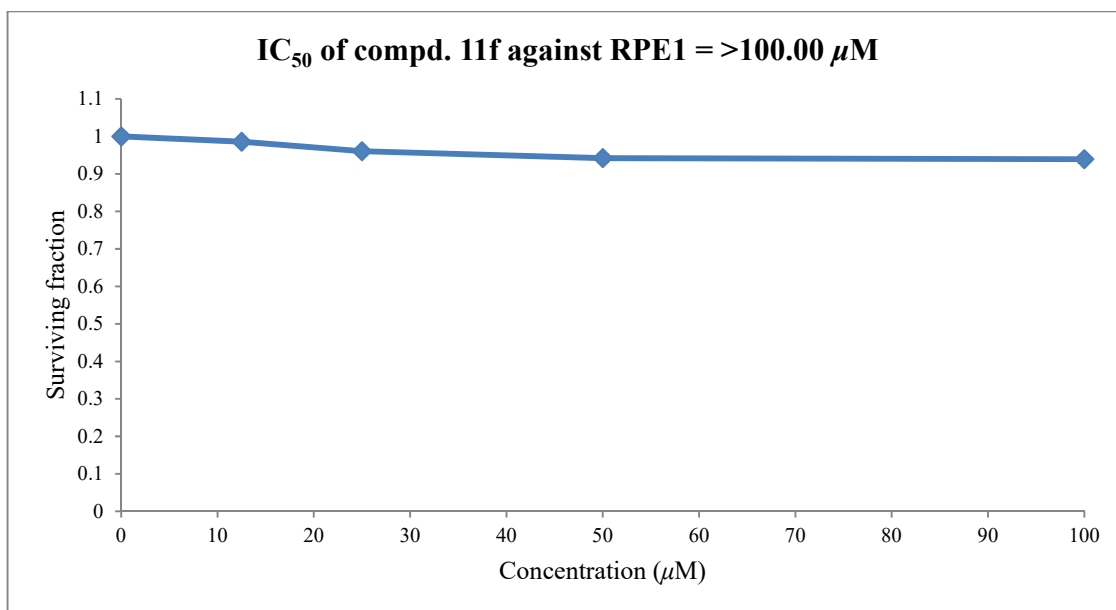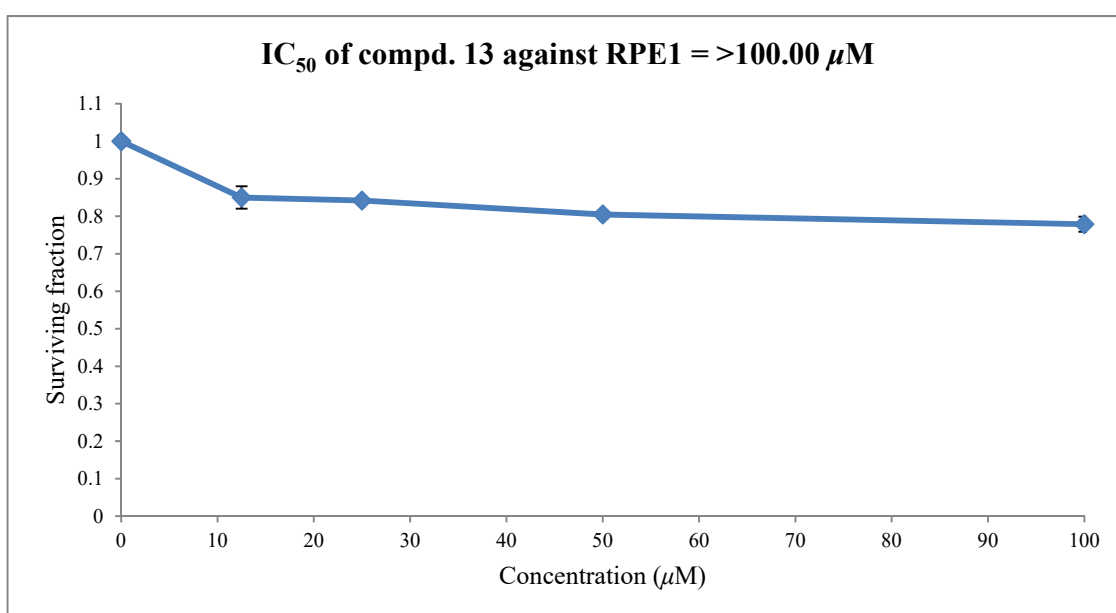

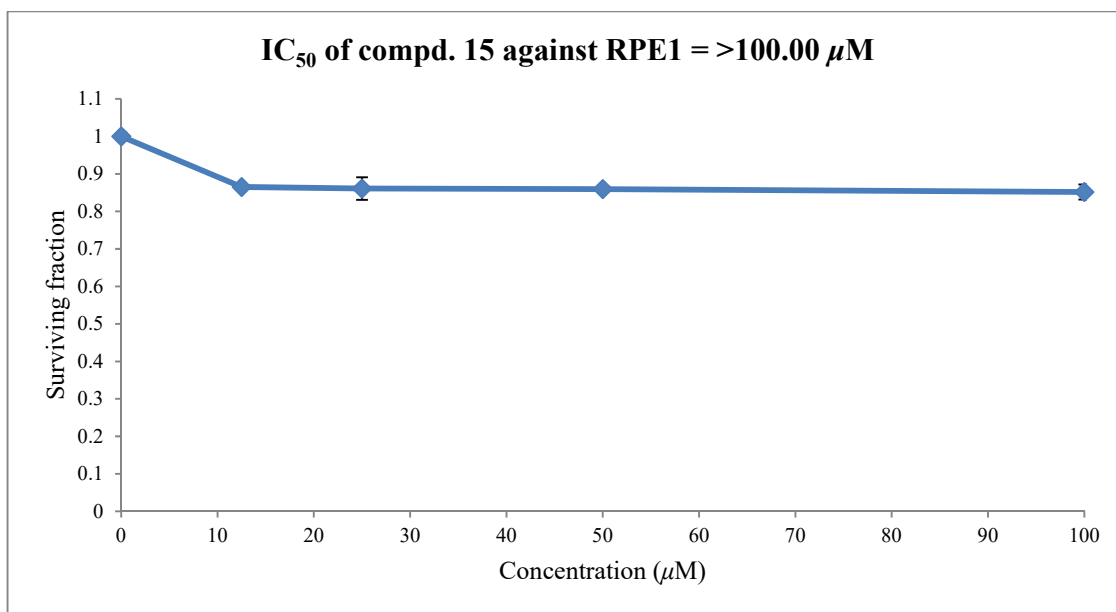

**Fig. S1.** Dose-response curve for the tested compounds against RPE1 (retinal pigment epithelium) cell line.

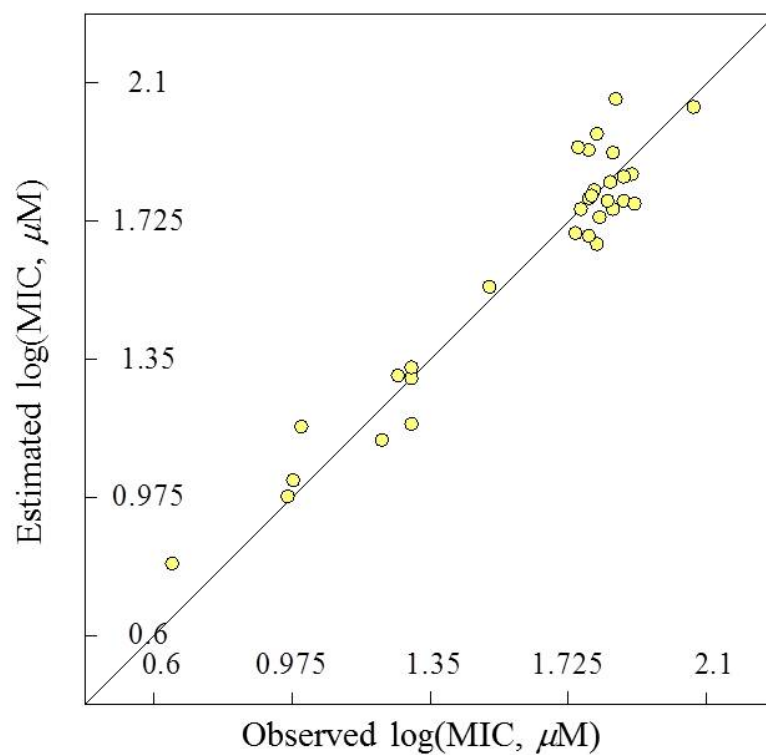

**Fig. S2.** QSAR plot representing the observed versus predicted  $\log(\text{MIC}, \mu\text{M})$  for the tested compounds against *S. aureus*.

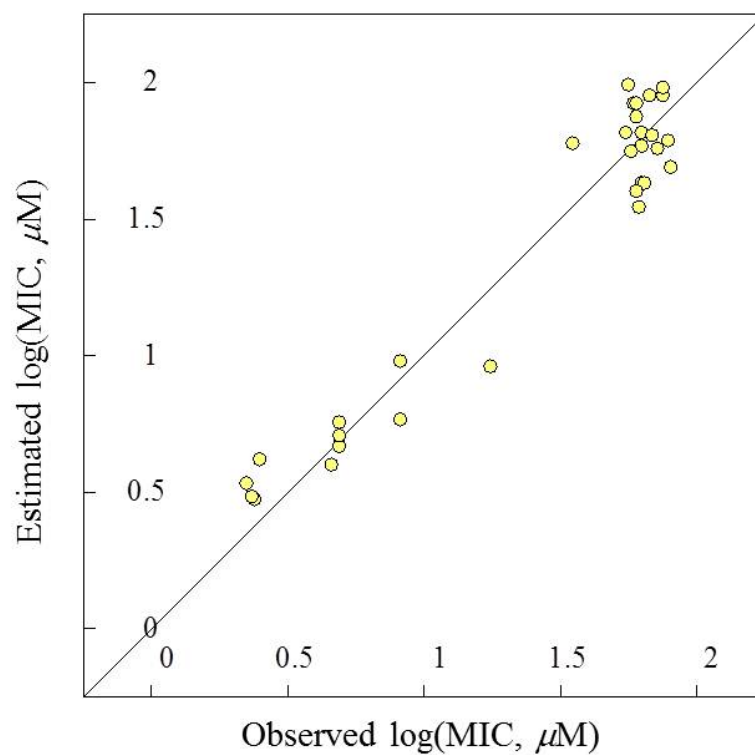

**Fig. S3.** QSAR plot representing the observed versus predicted  $\log(\text{MIC}, \mu\text{M})$  for the tested compounds against *B. subtilis*.

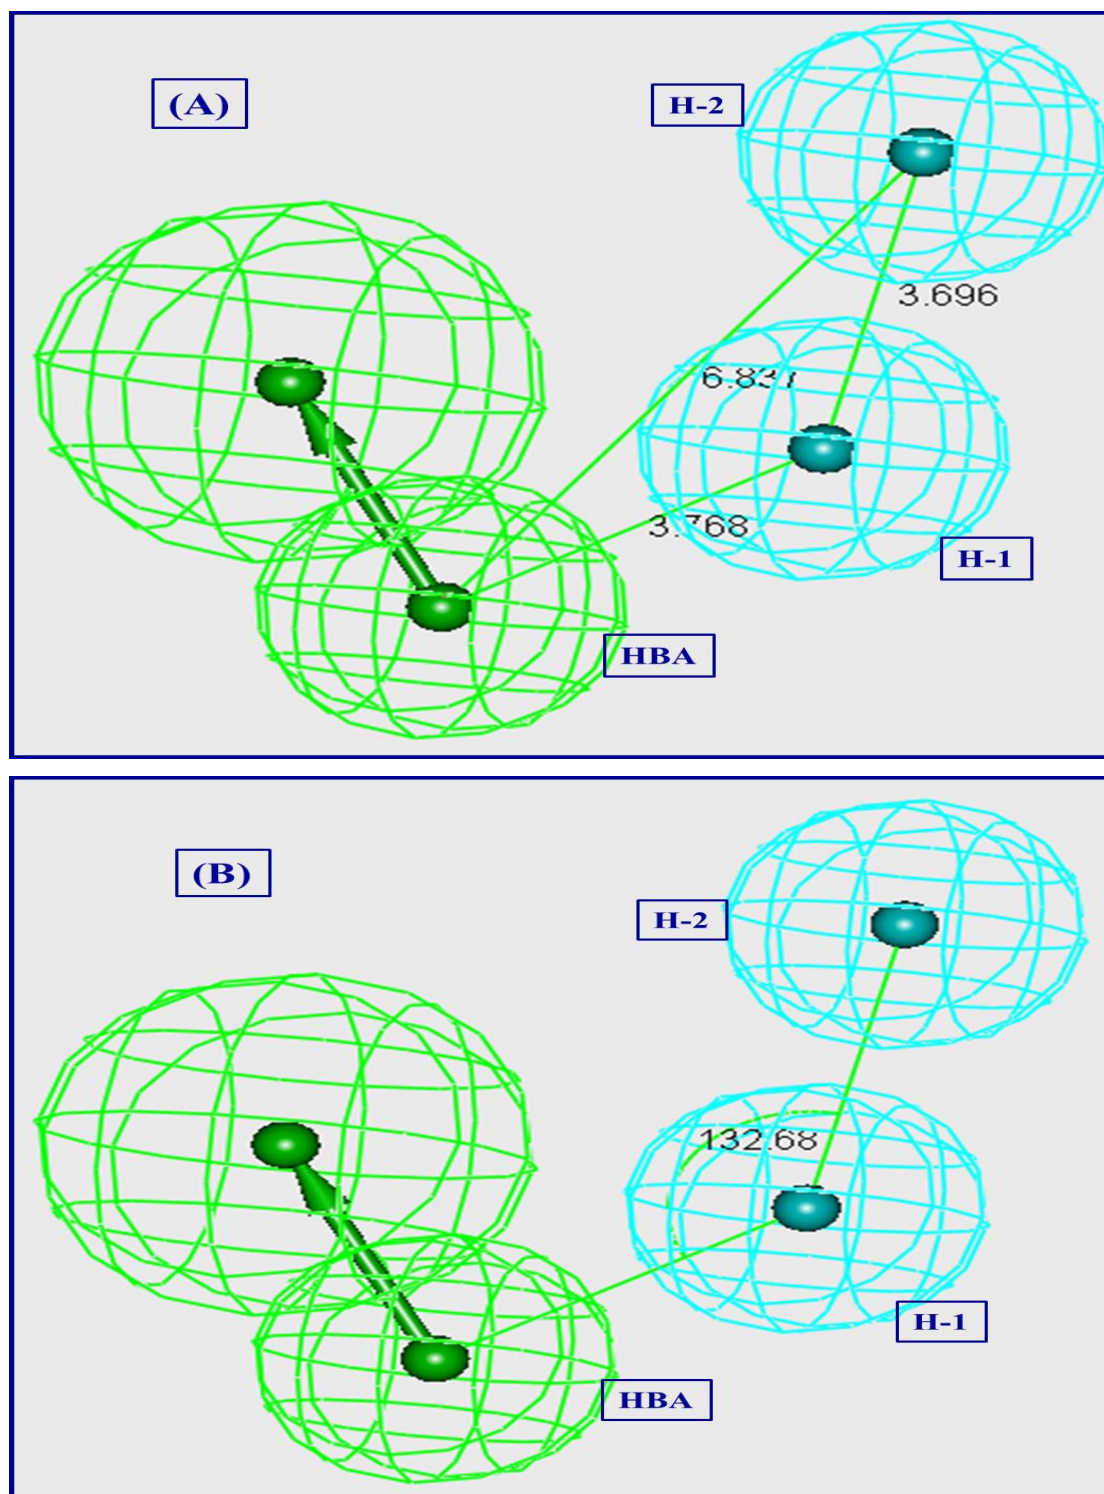

**Fig. S4.** (A) Constraint distances “H-1 – H-2 = 3.696, H-1 – HBA = 3.768, H-2 – HBA = 6.837 Å”, (B) Constraint angle “H-2 – H-1 – HBA = 132.68 °” of the generated 3D-pharmacophore for the tested compounds against *S. aureus*.

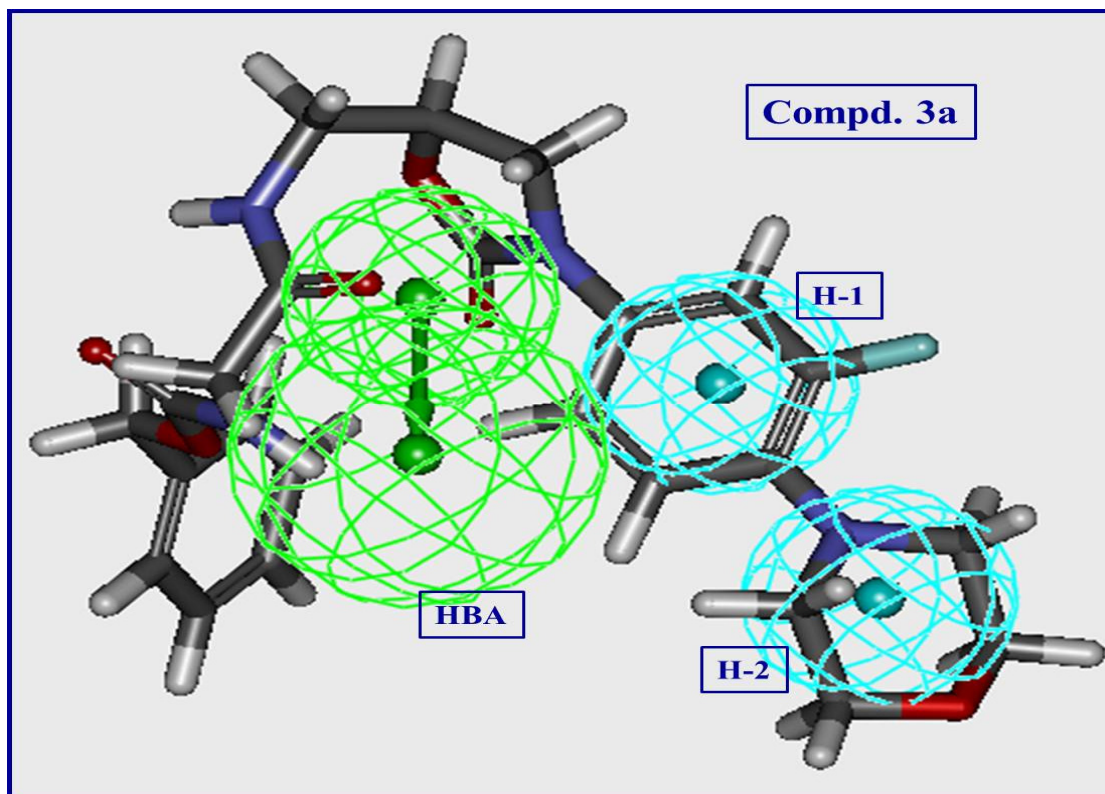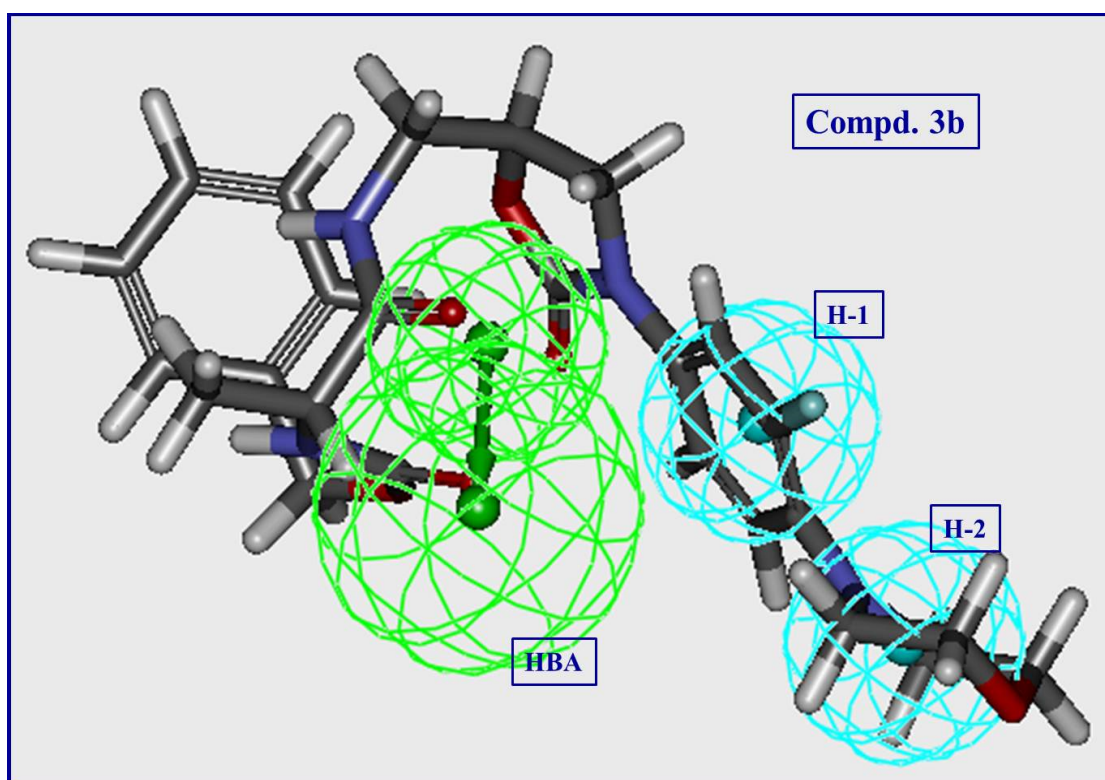



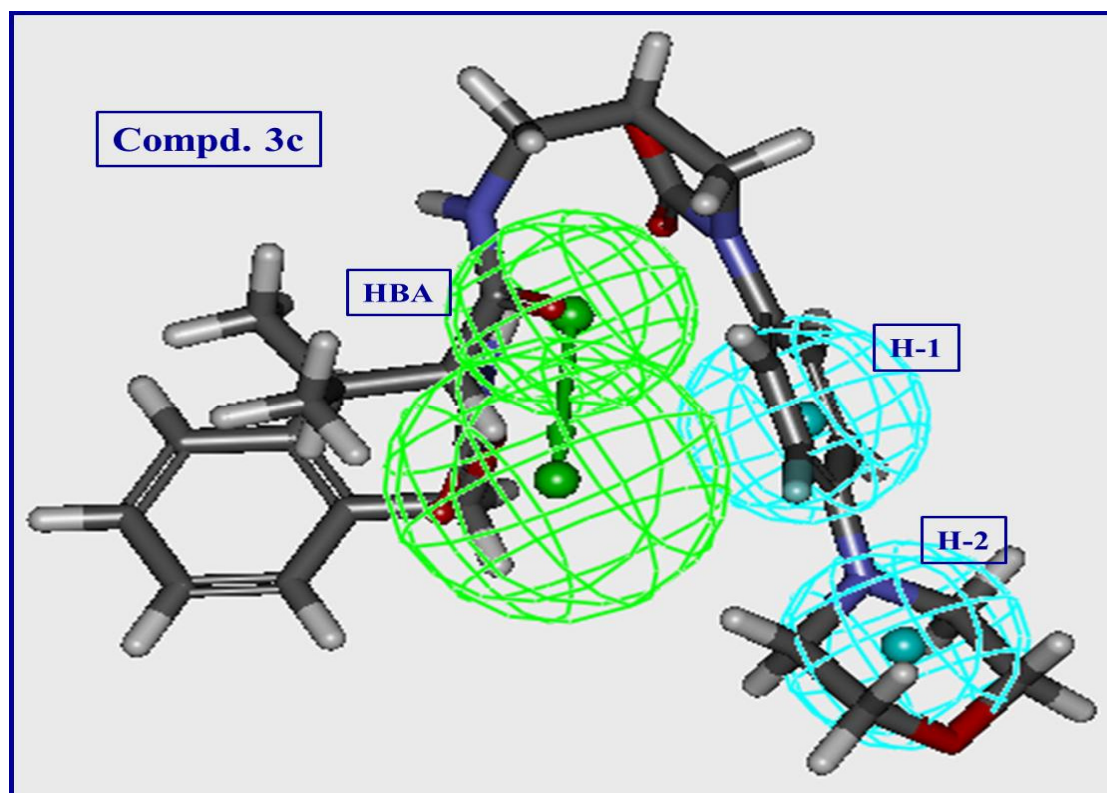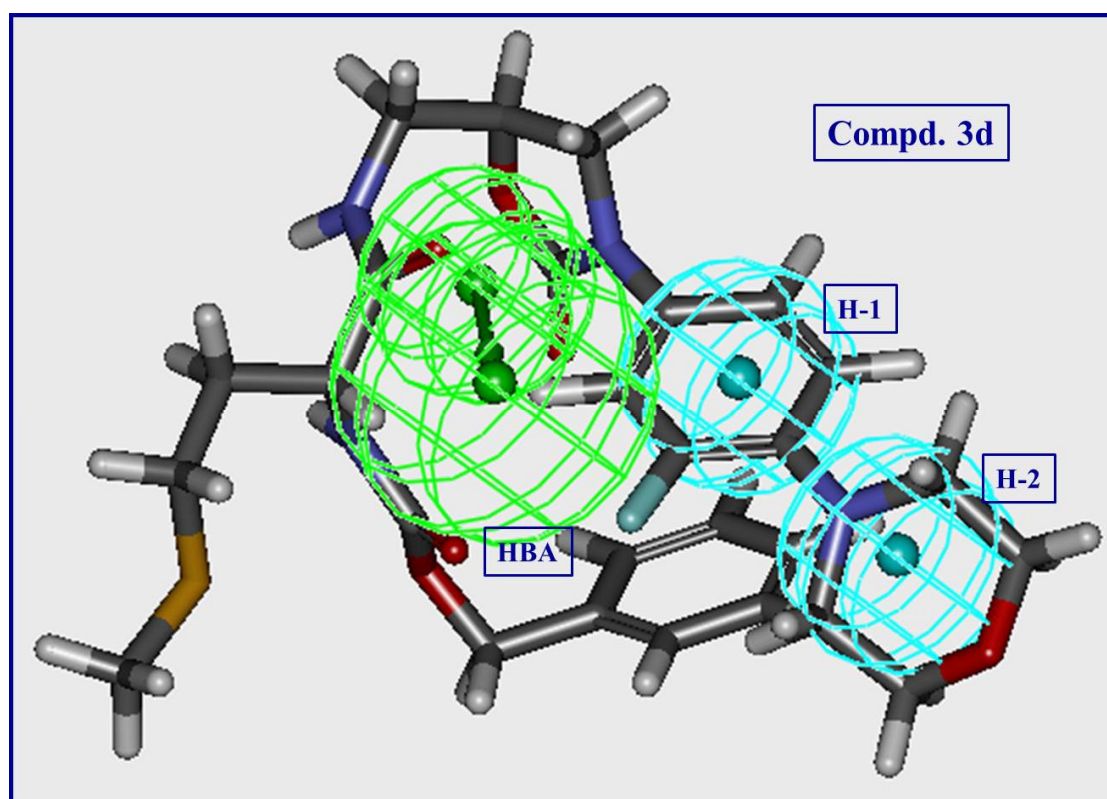



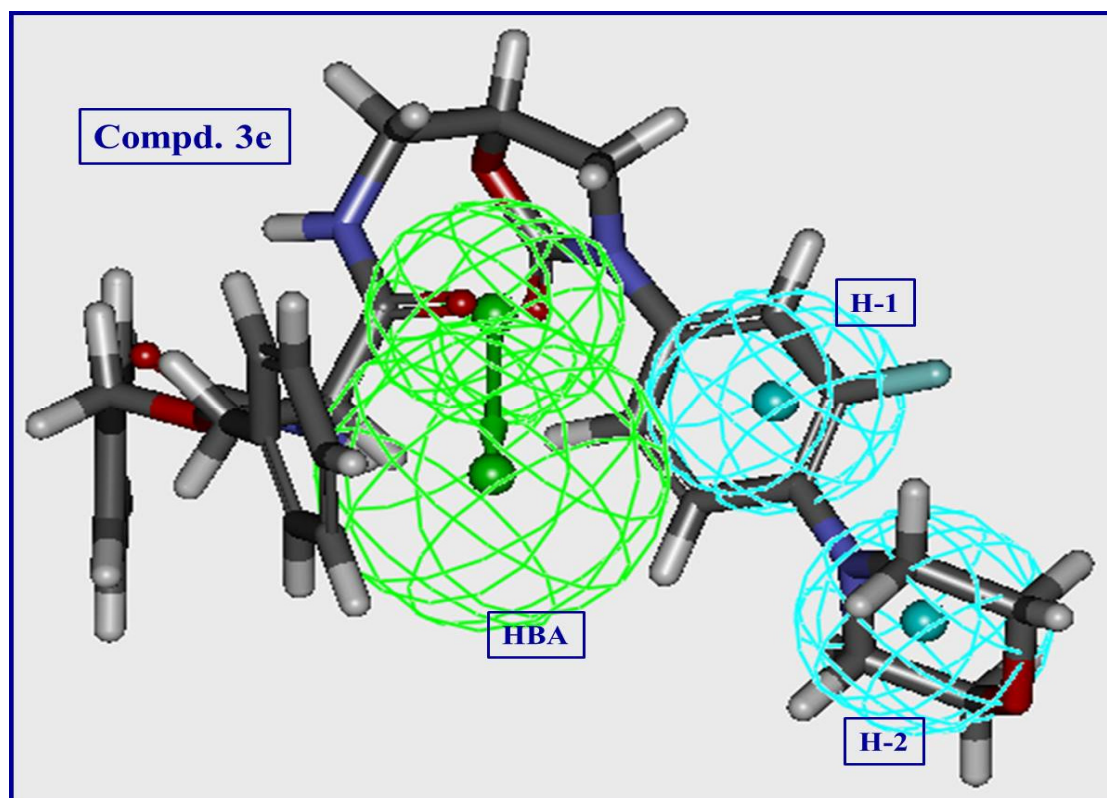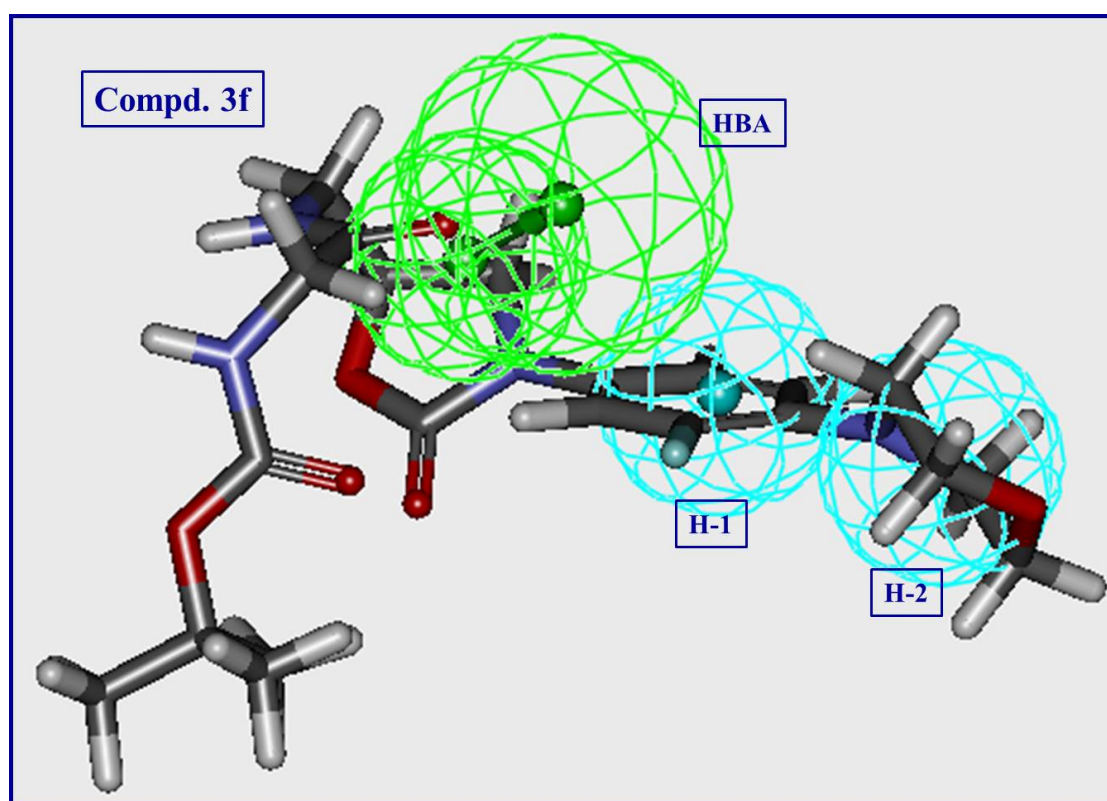

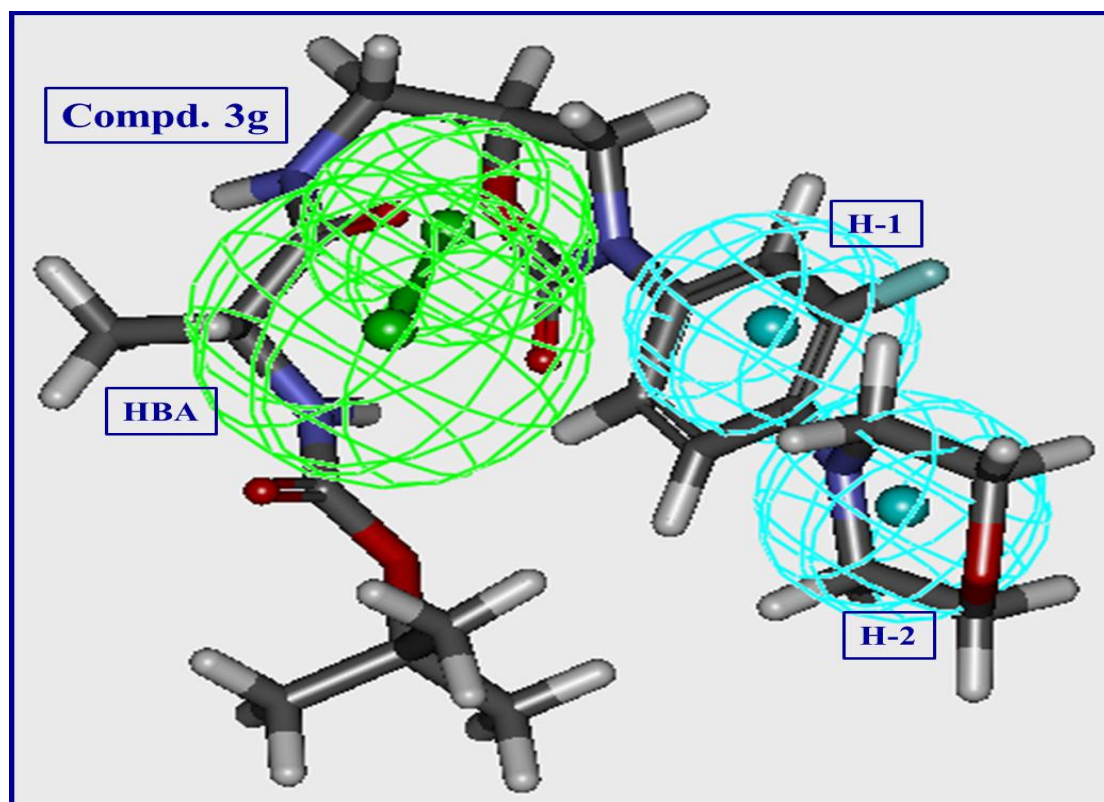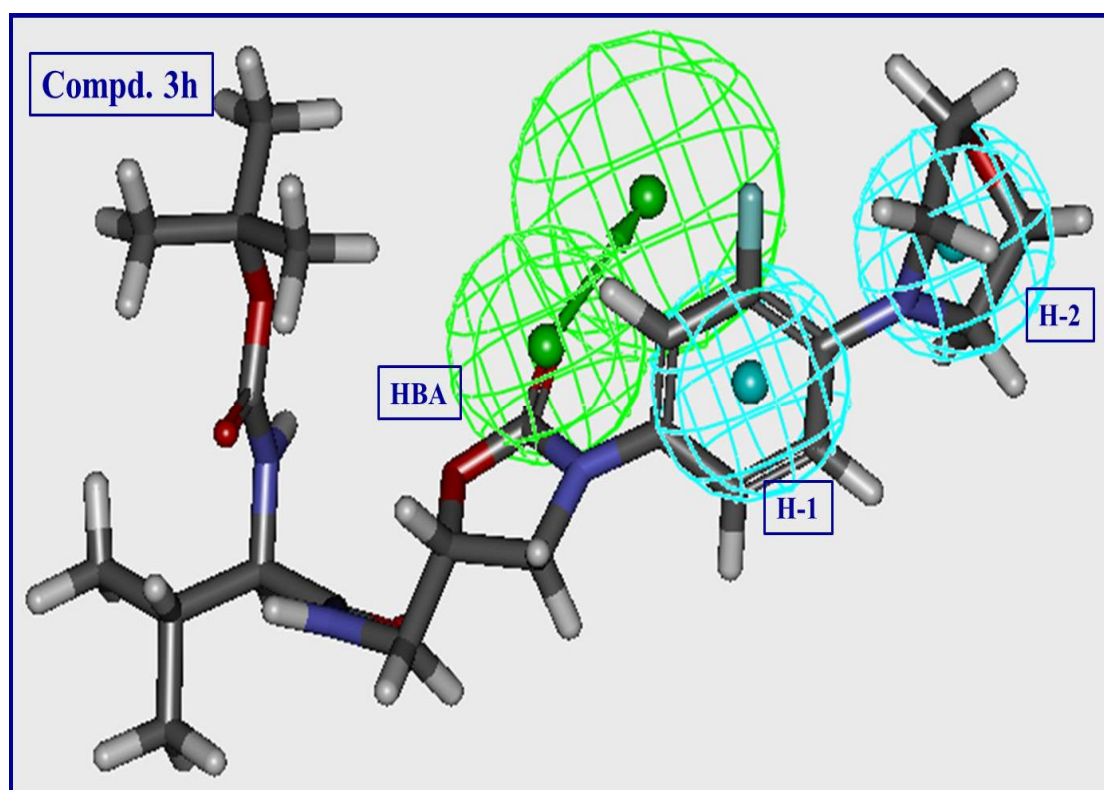

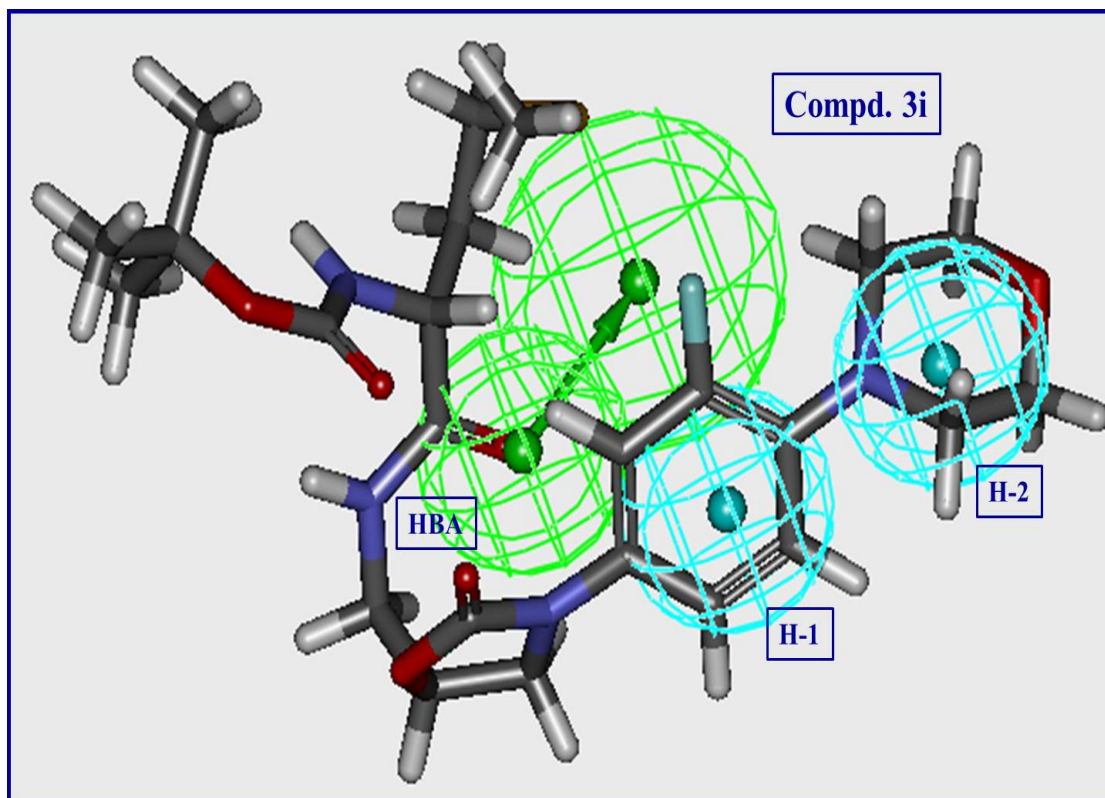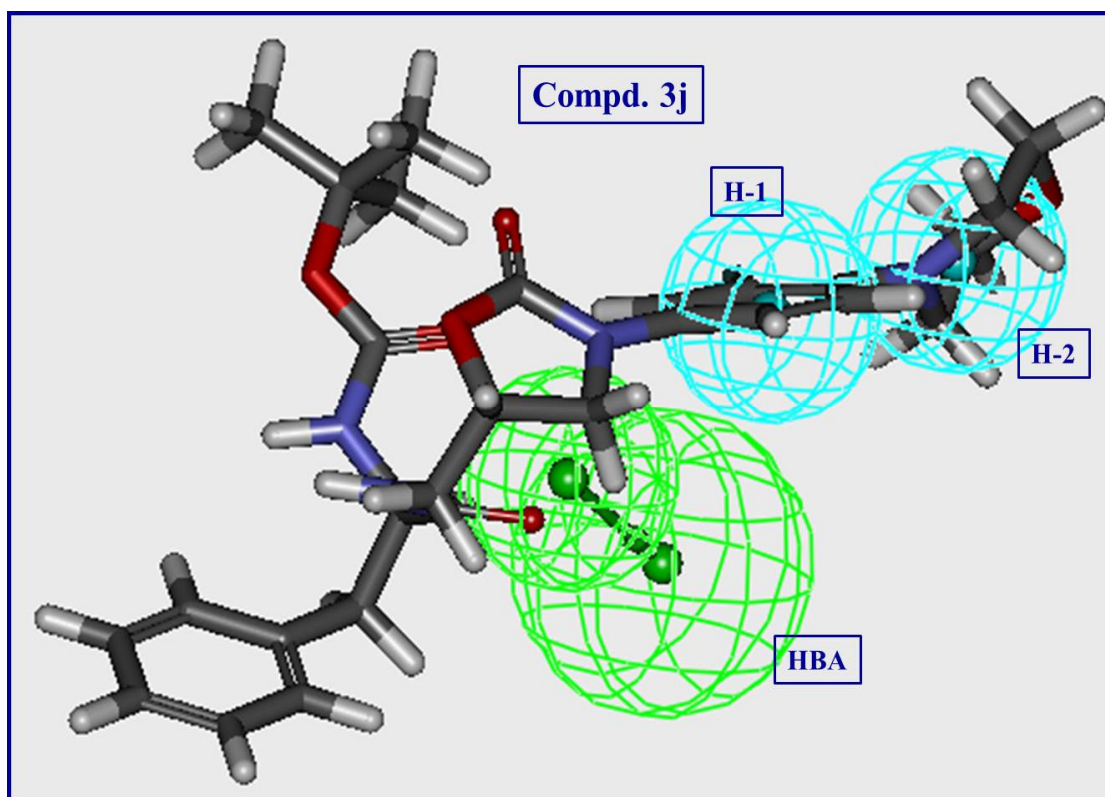



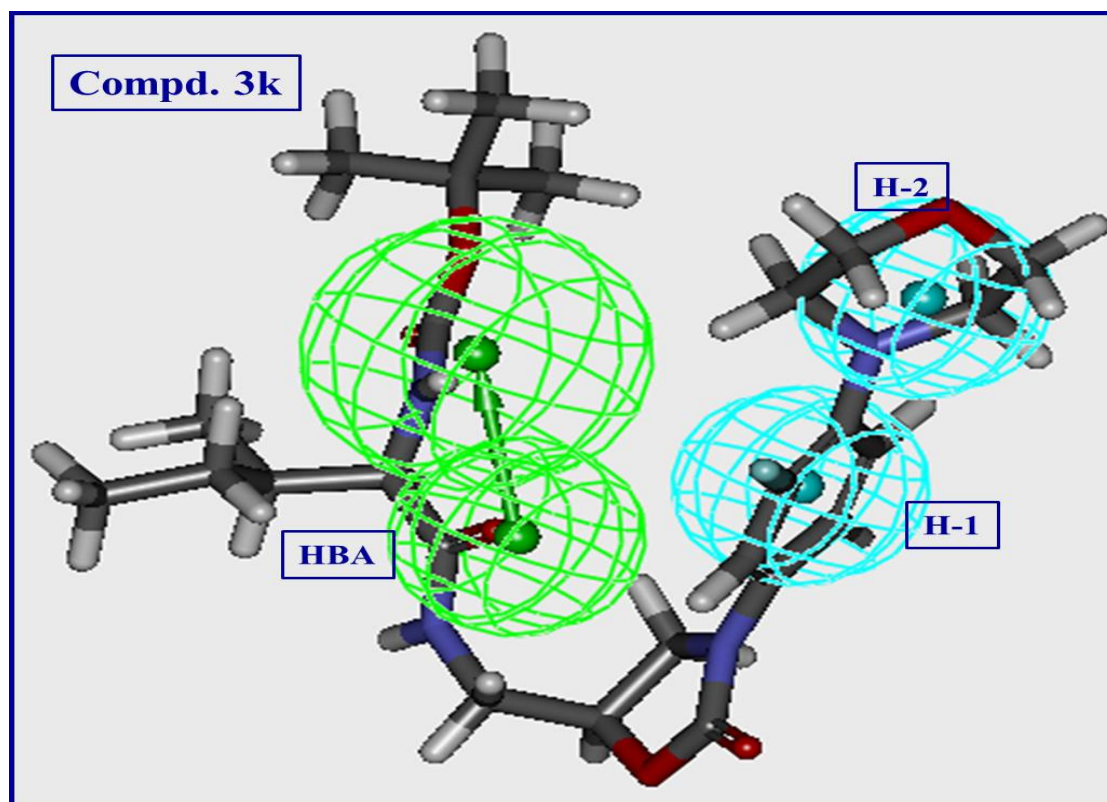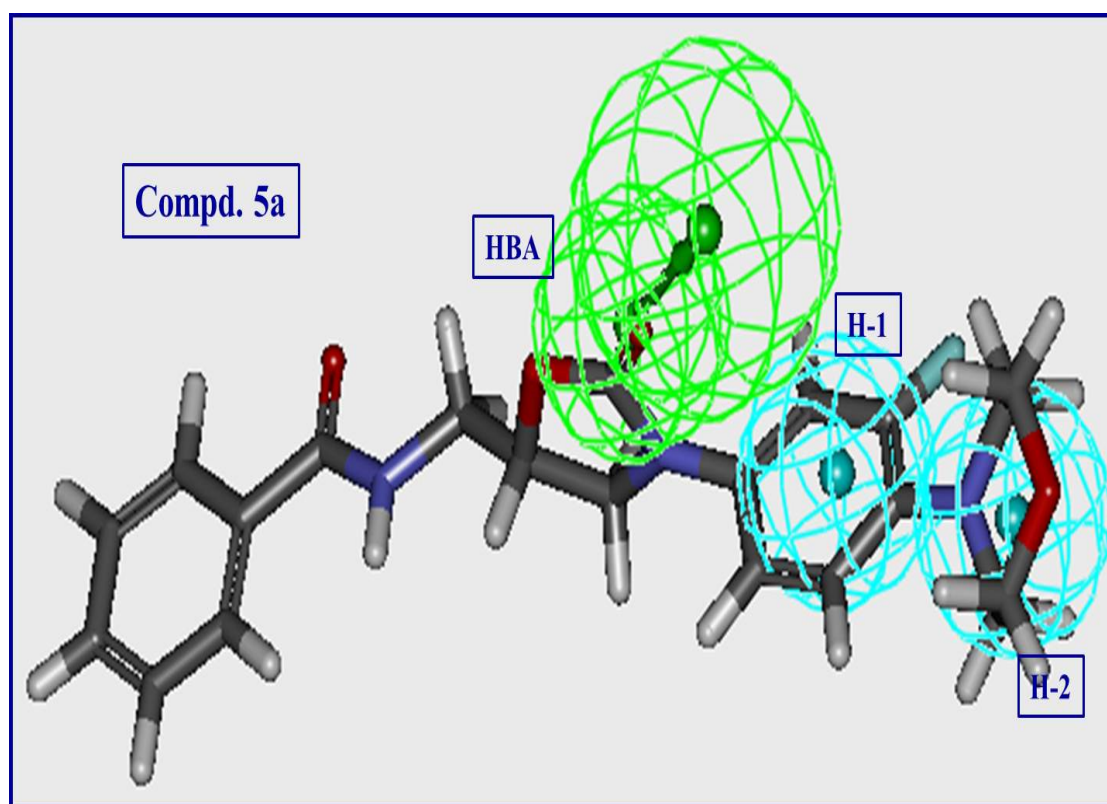

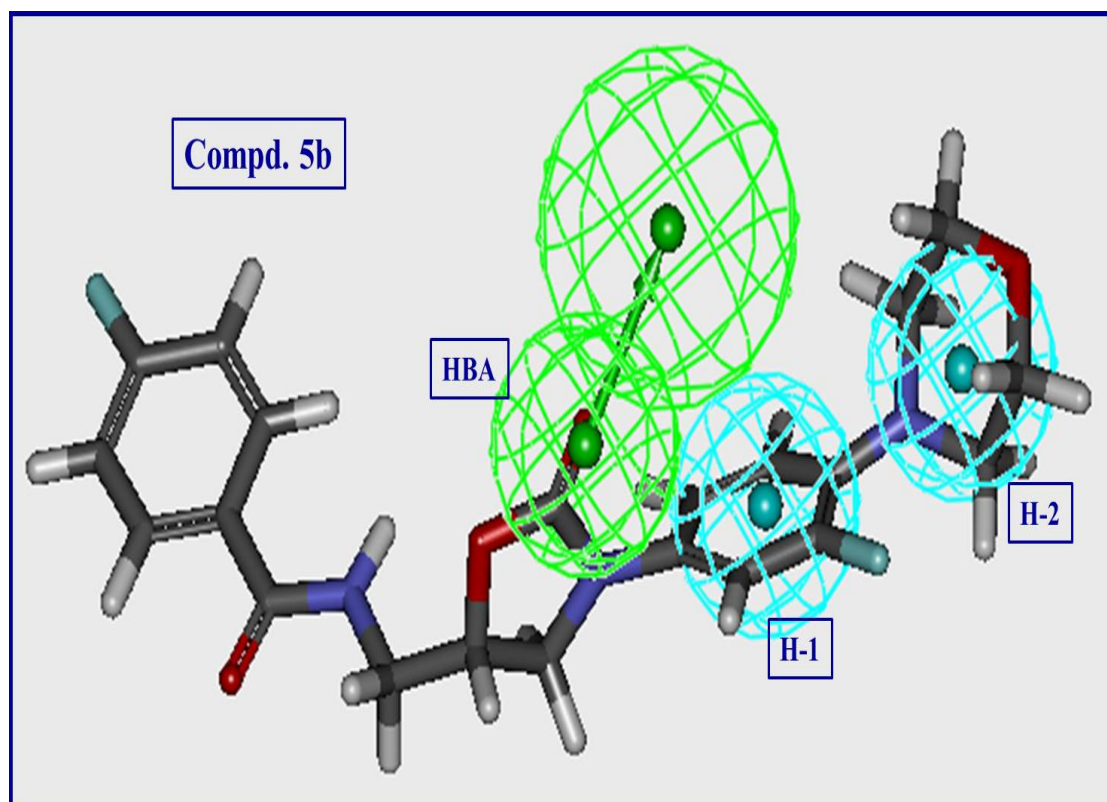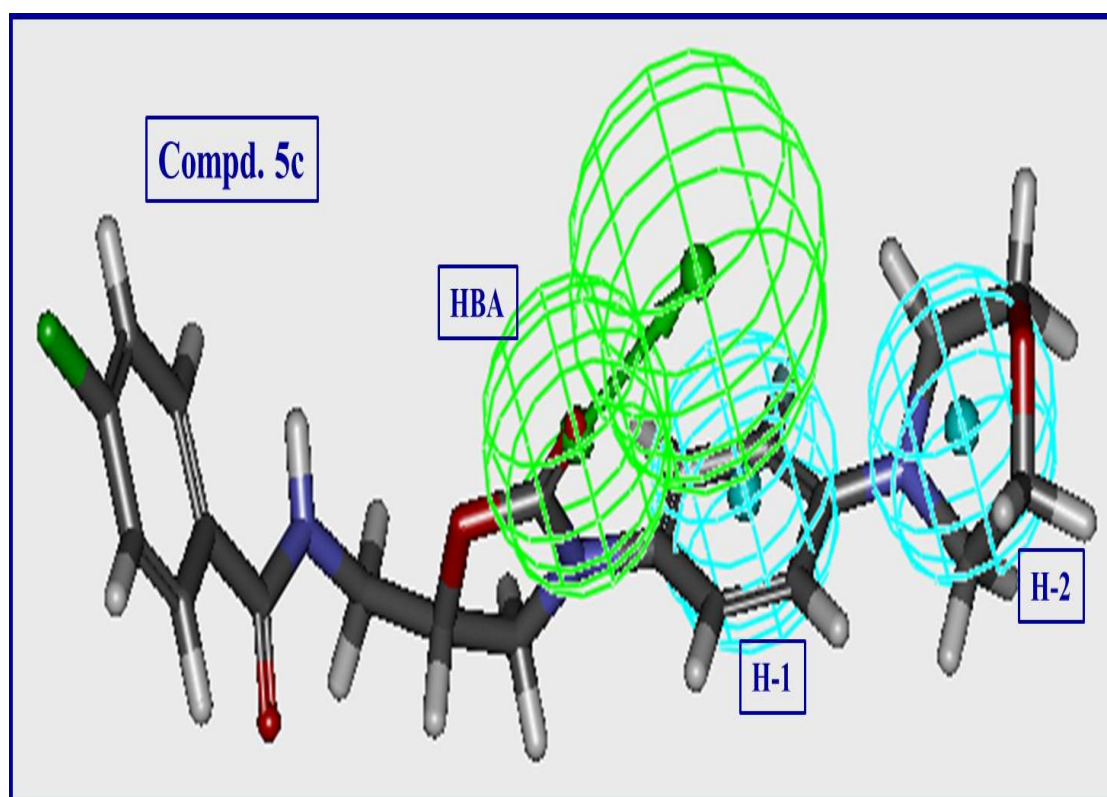

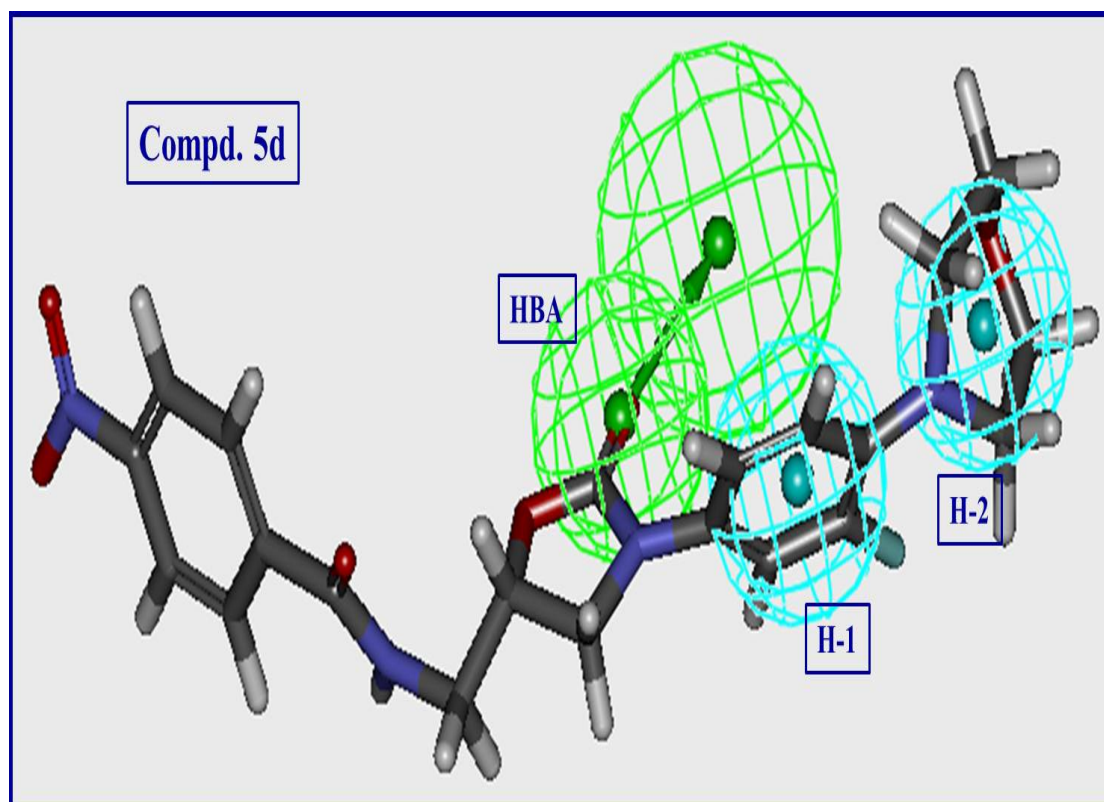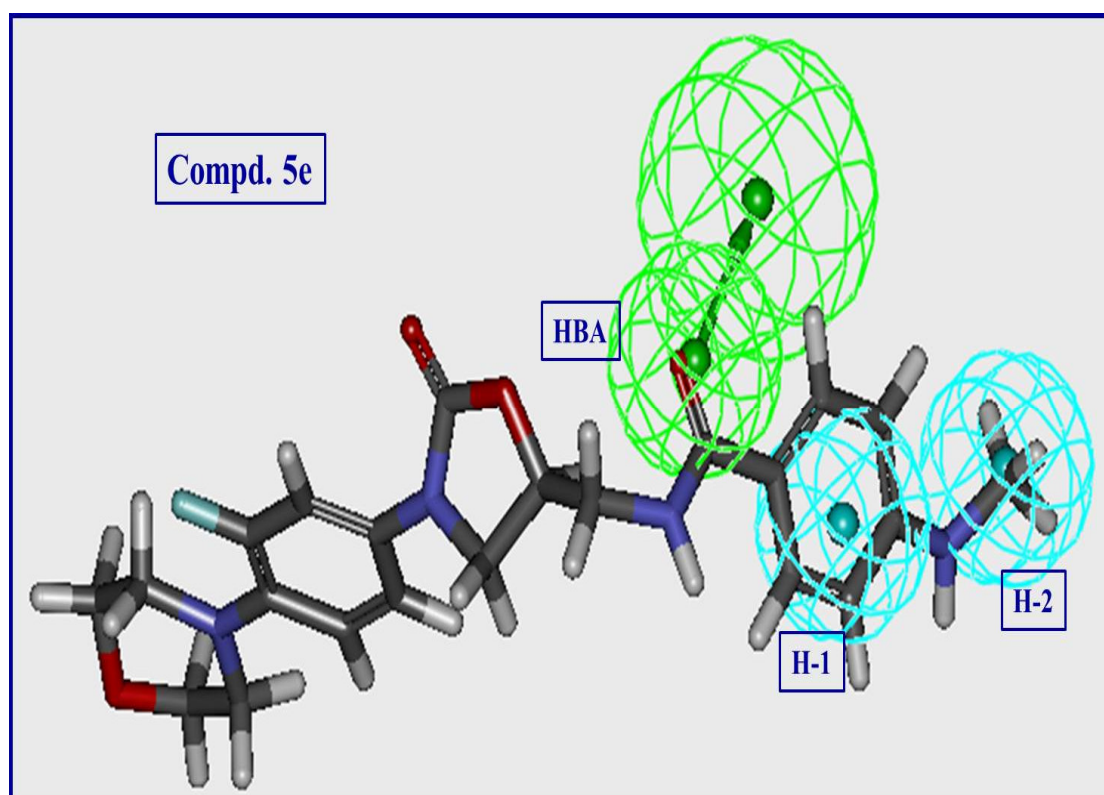



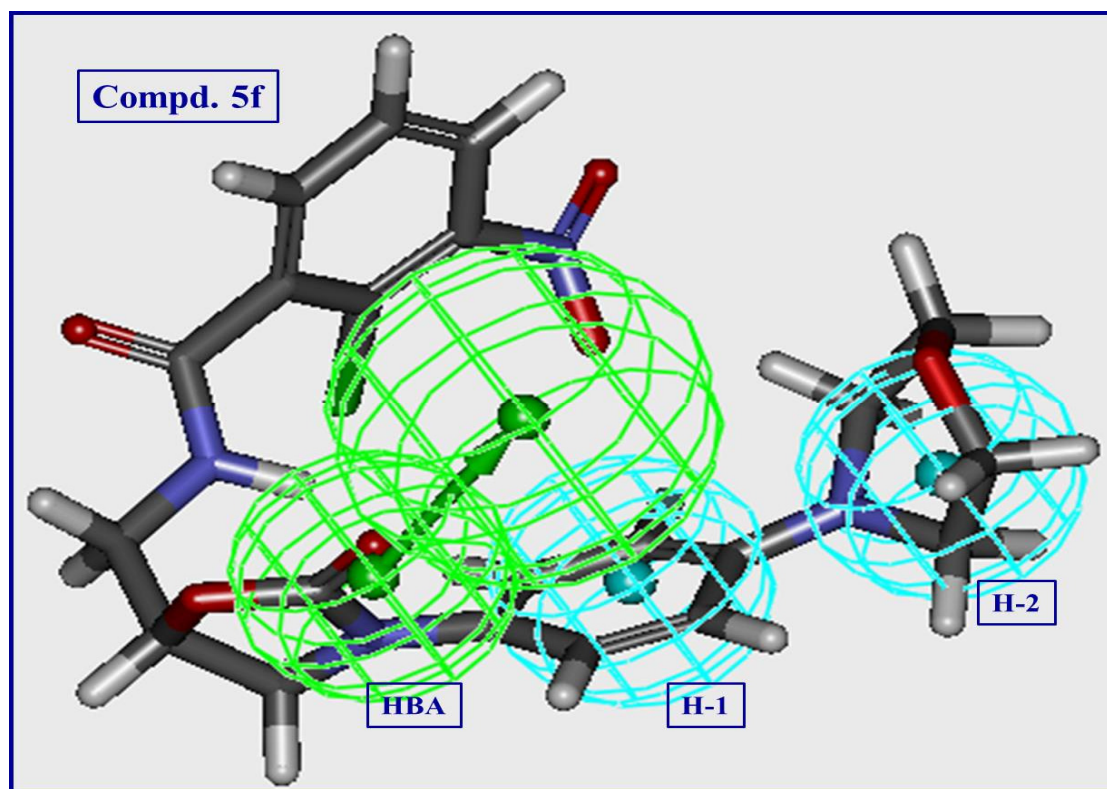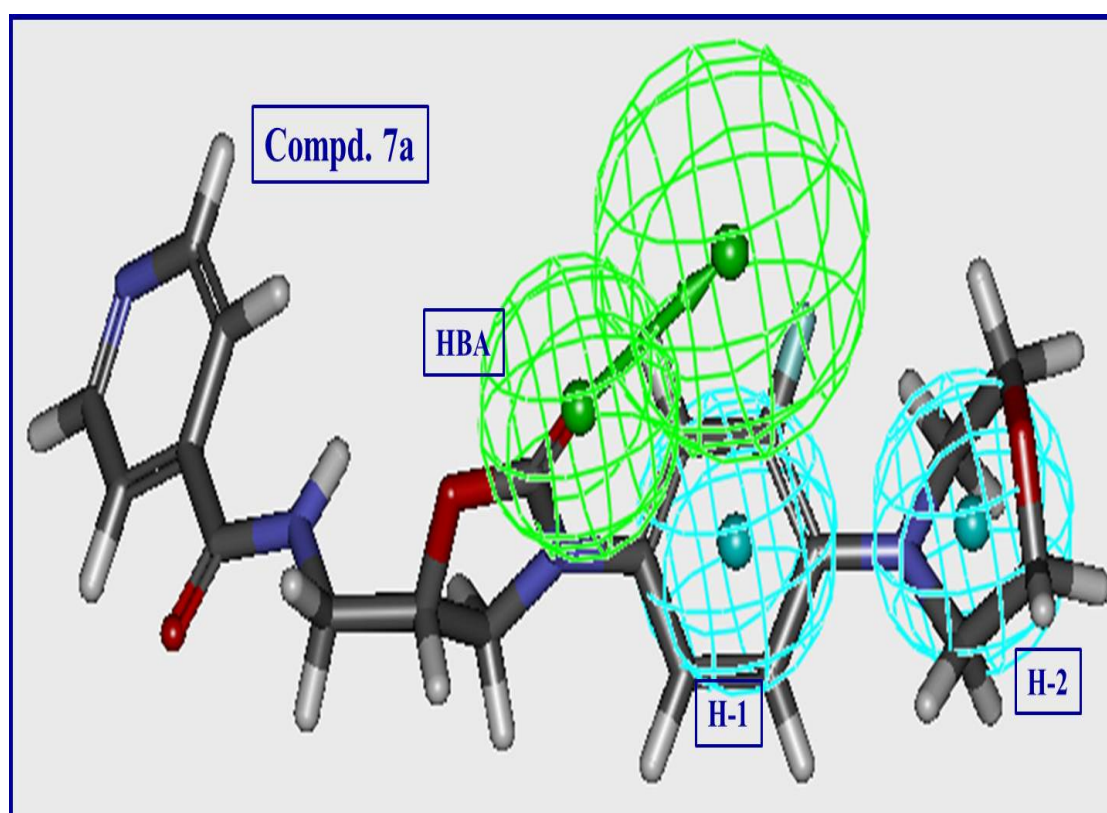

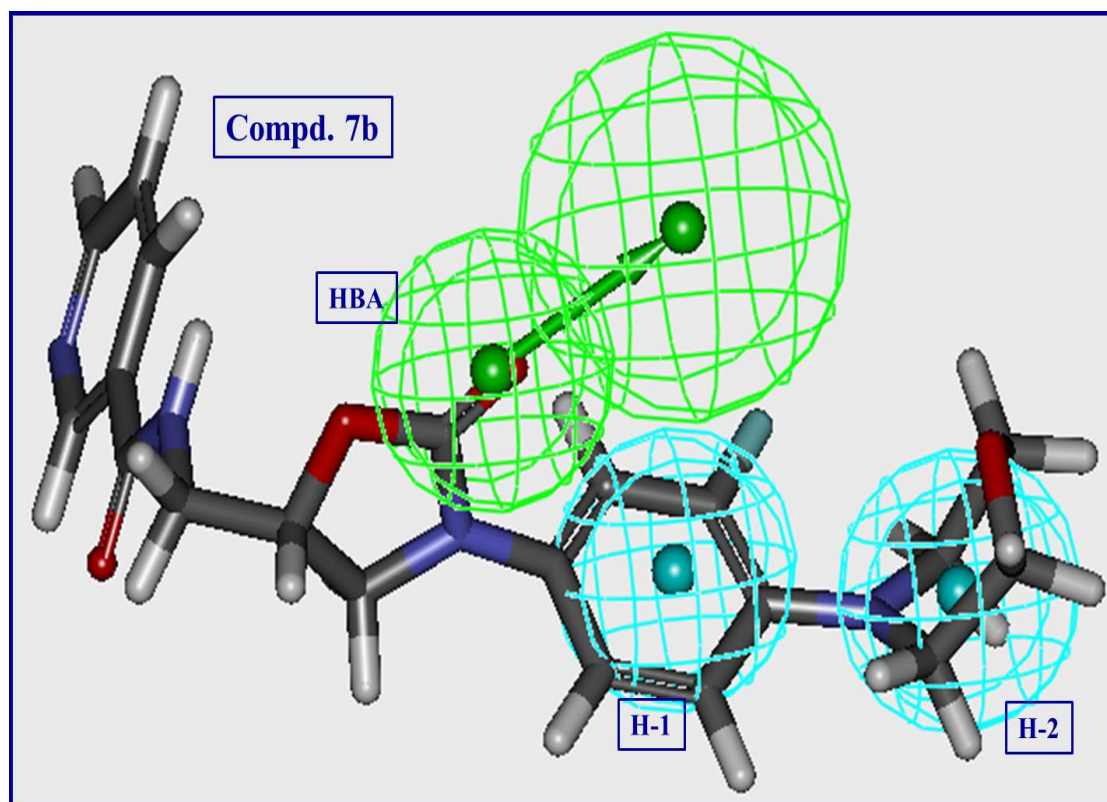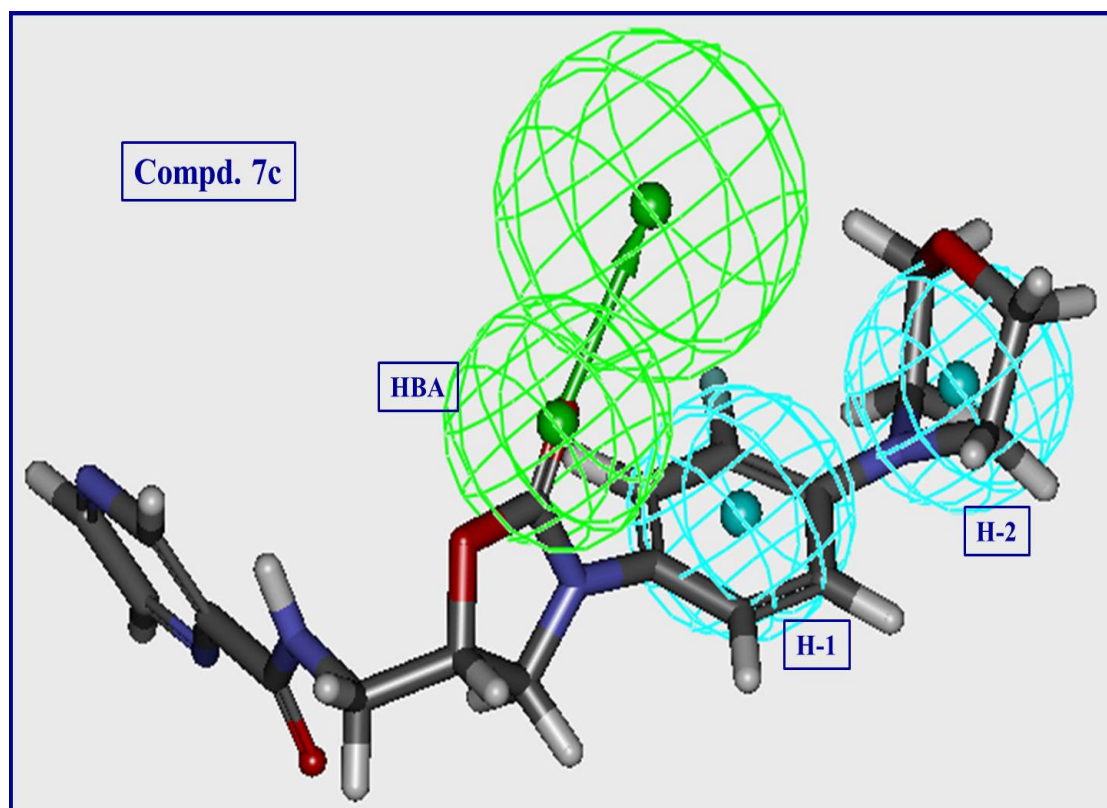



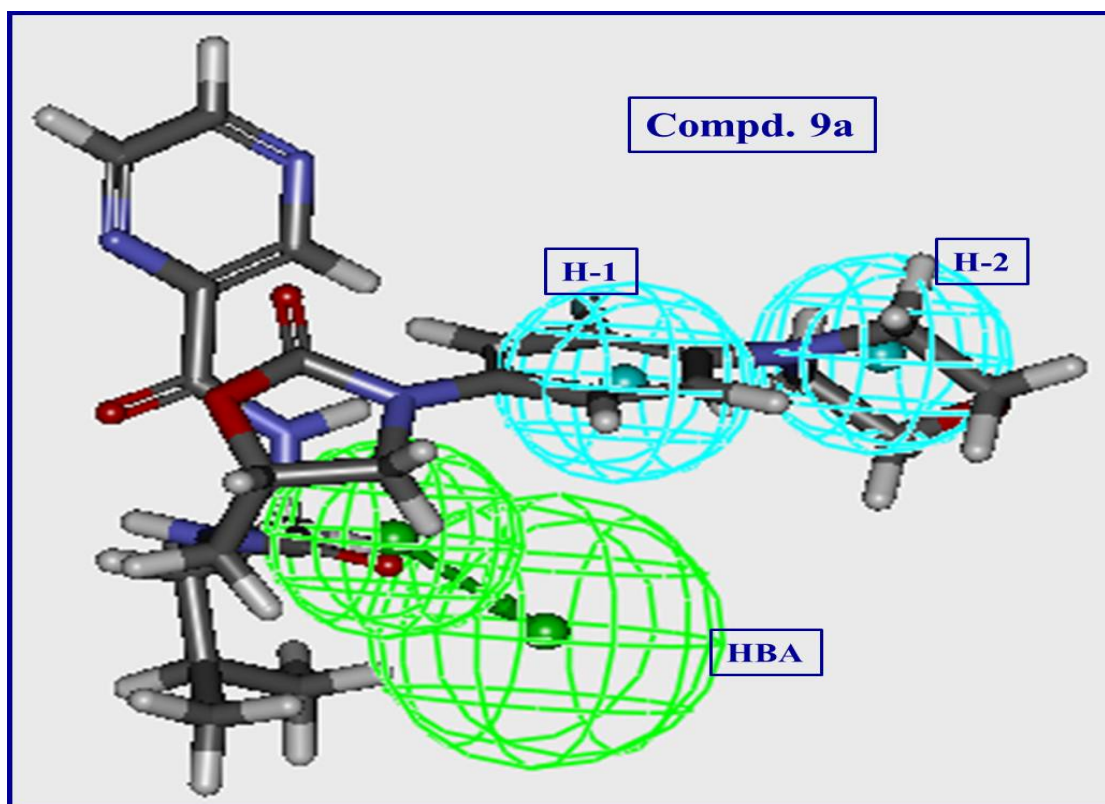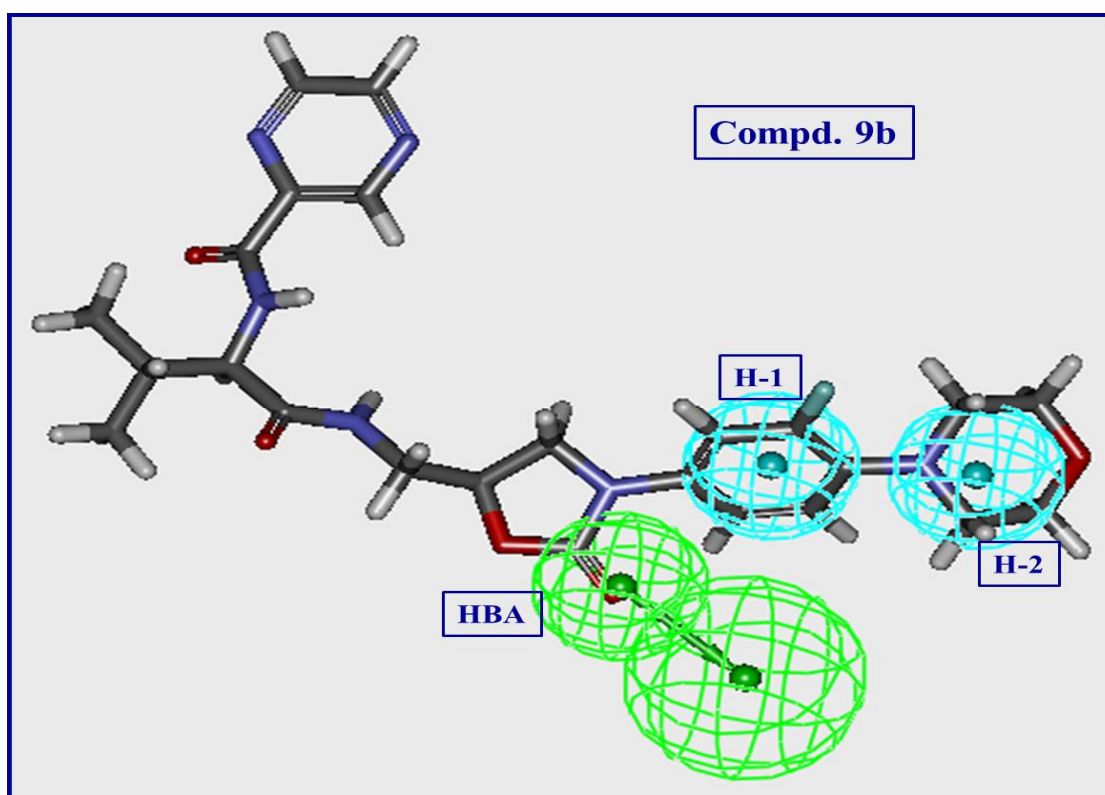

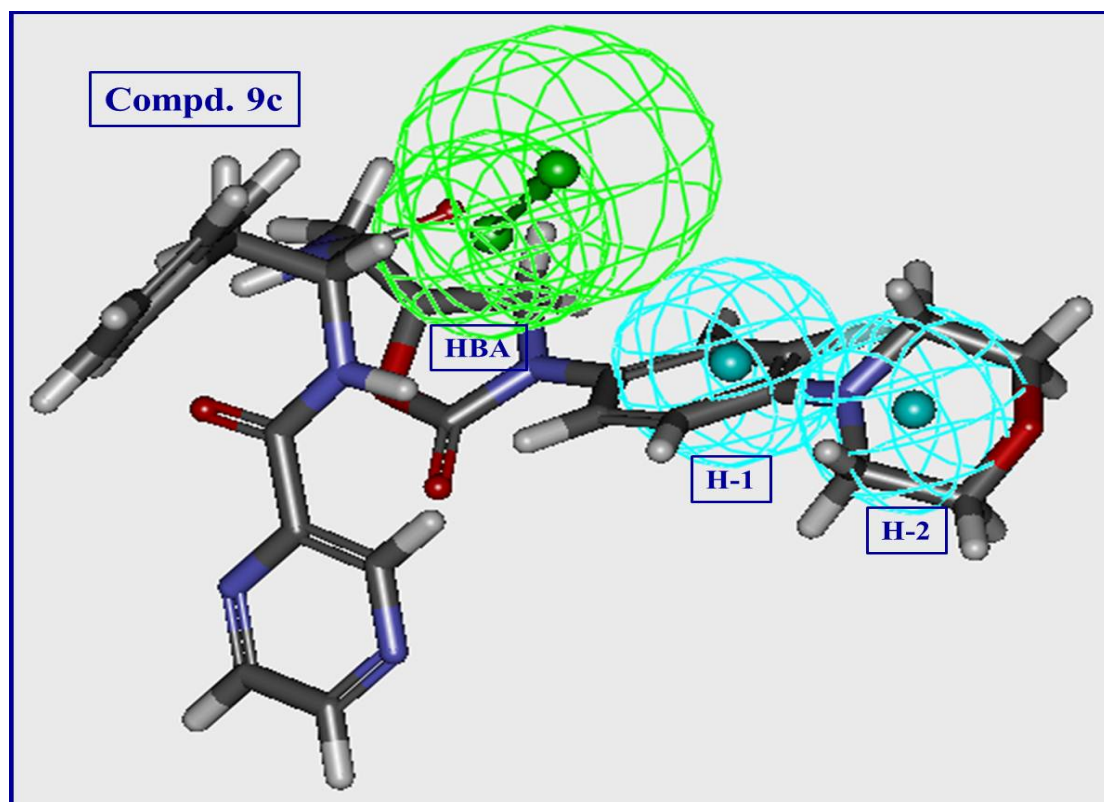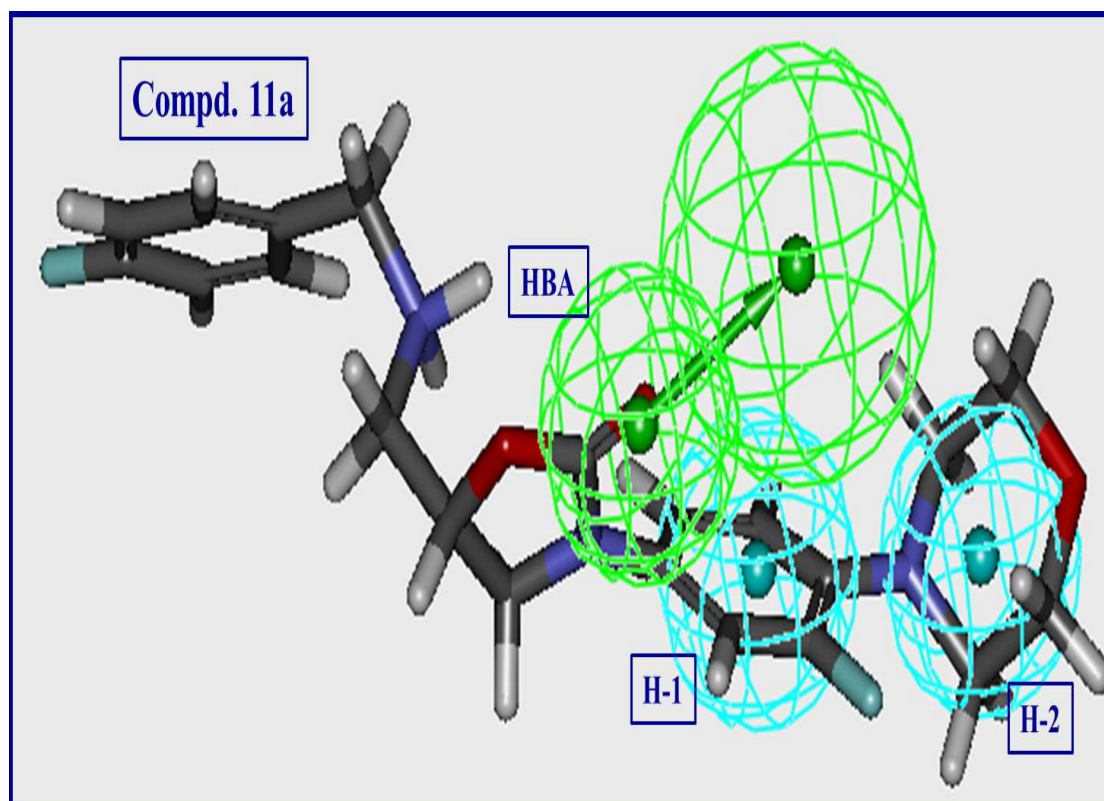

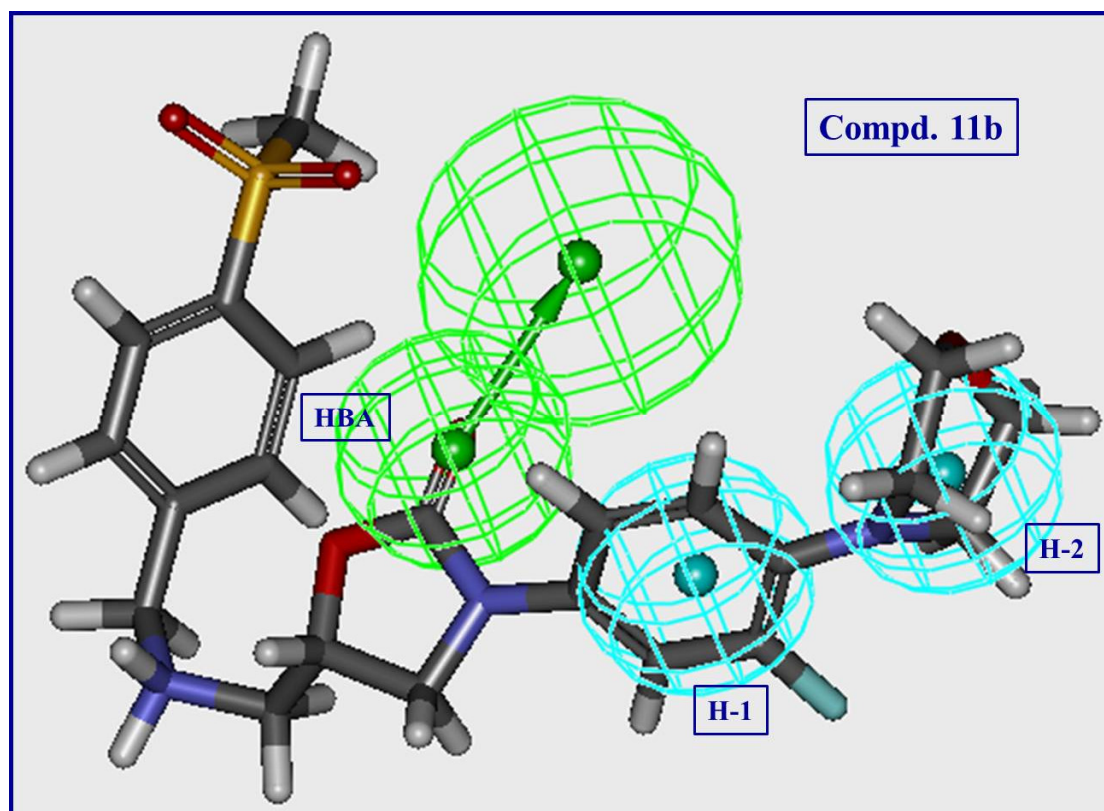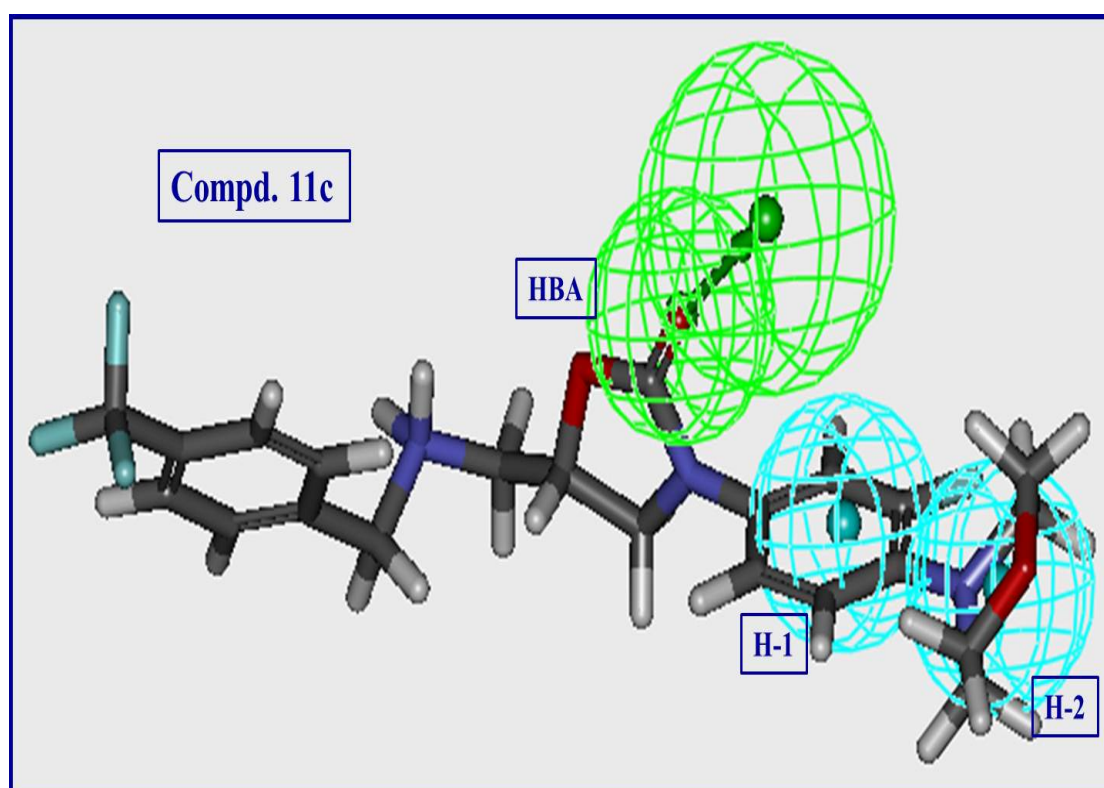



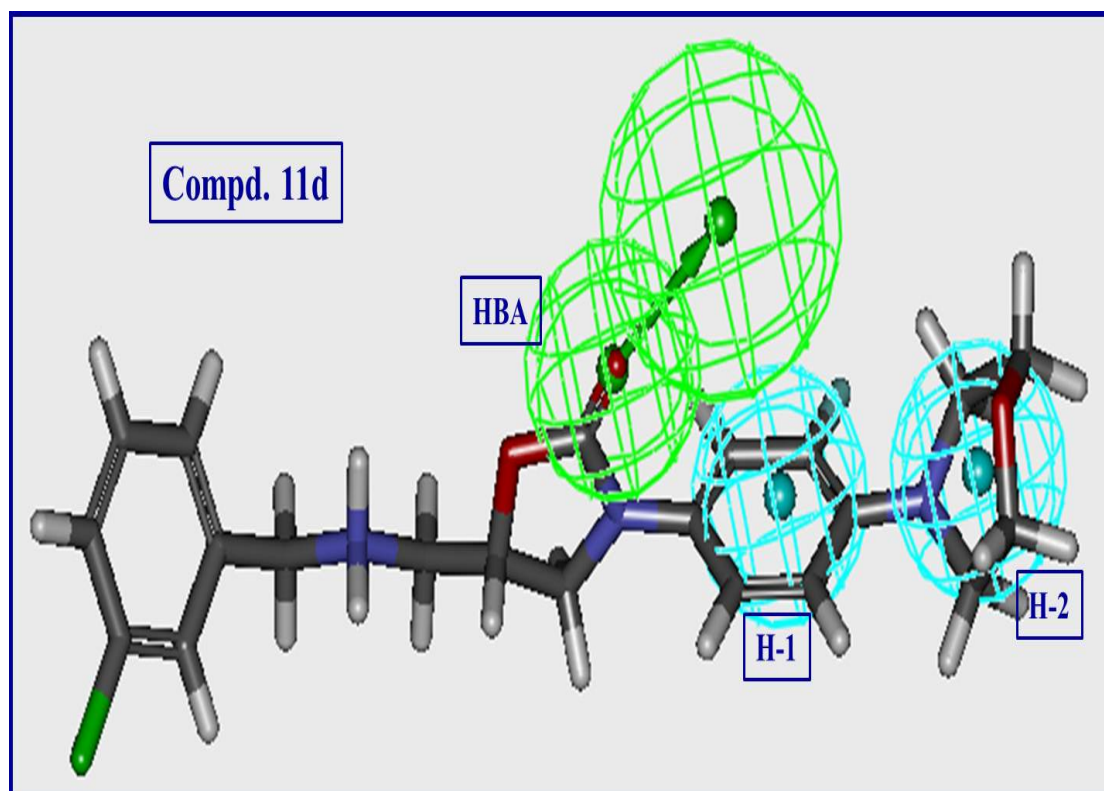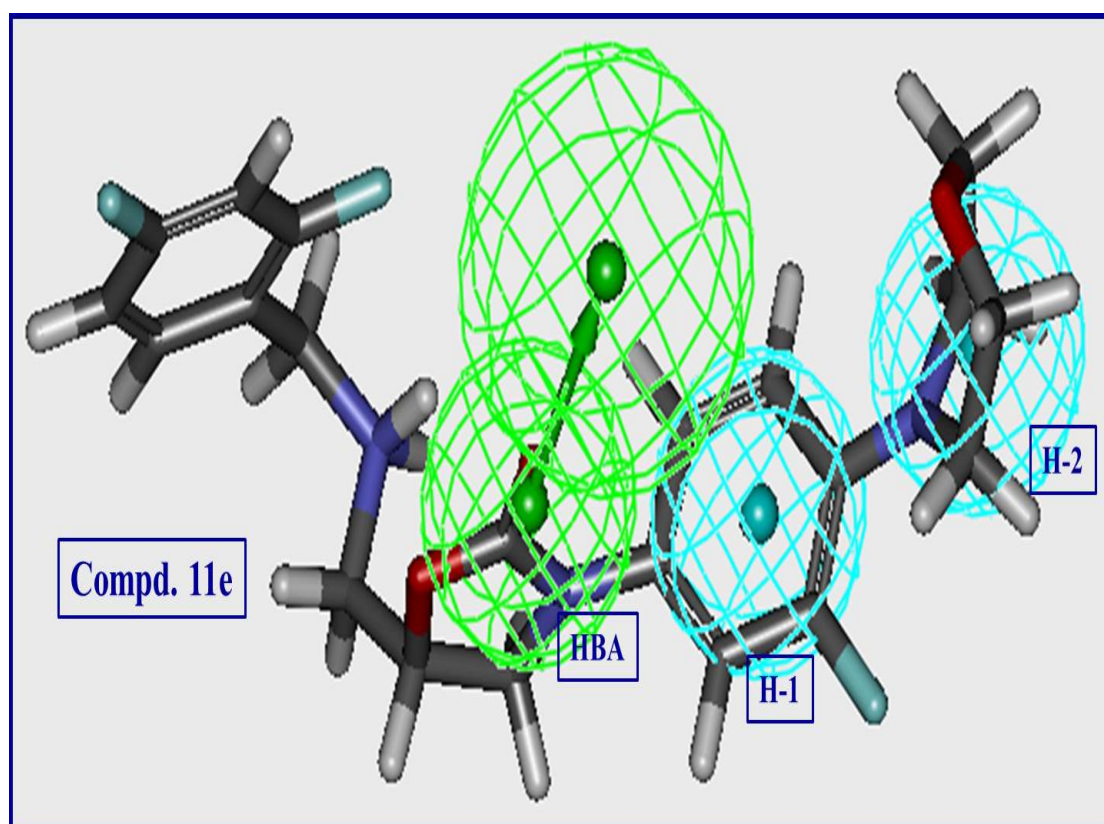

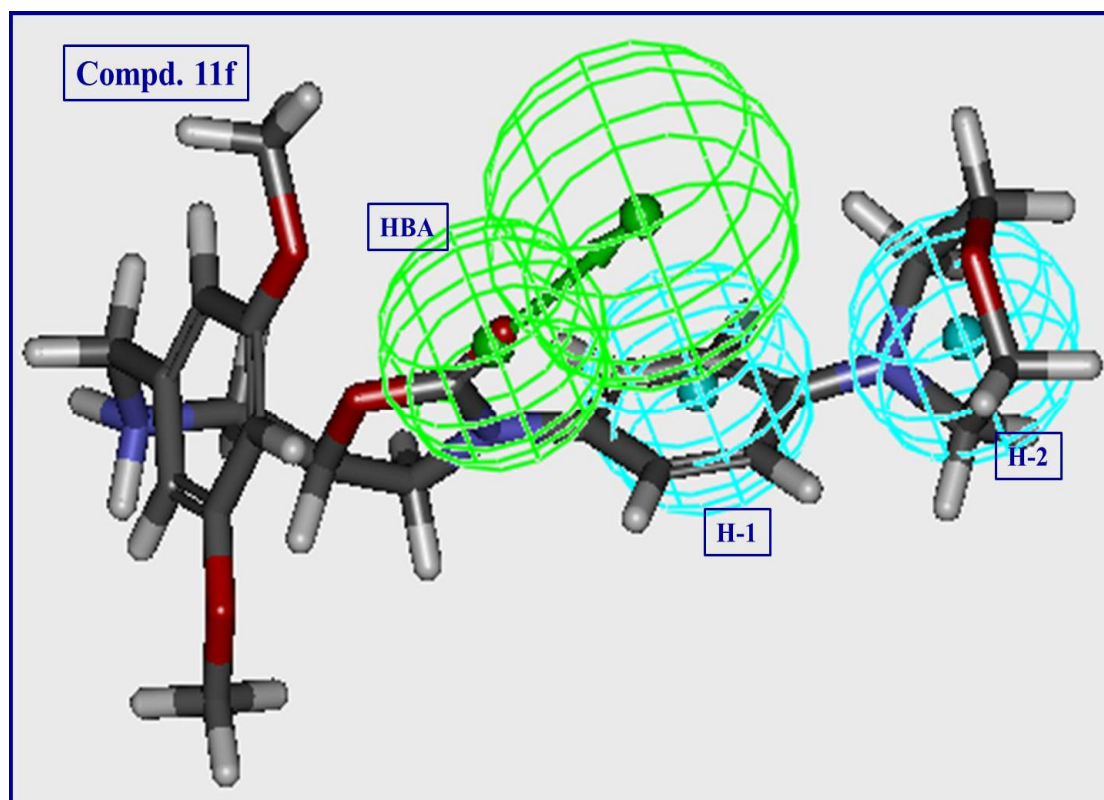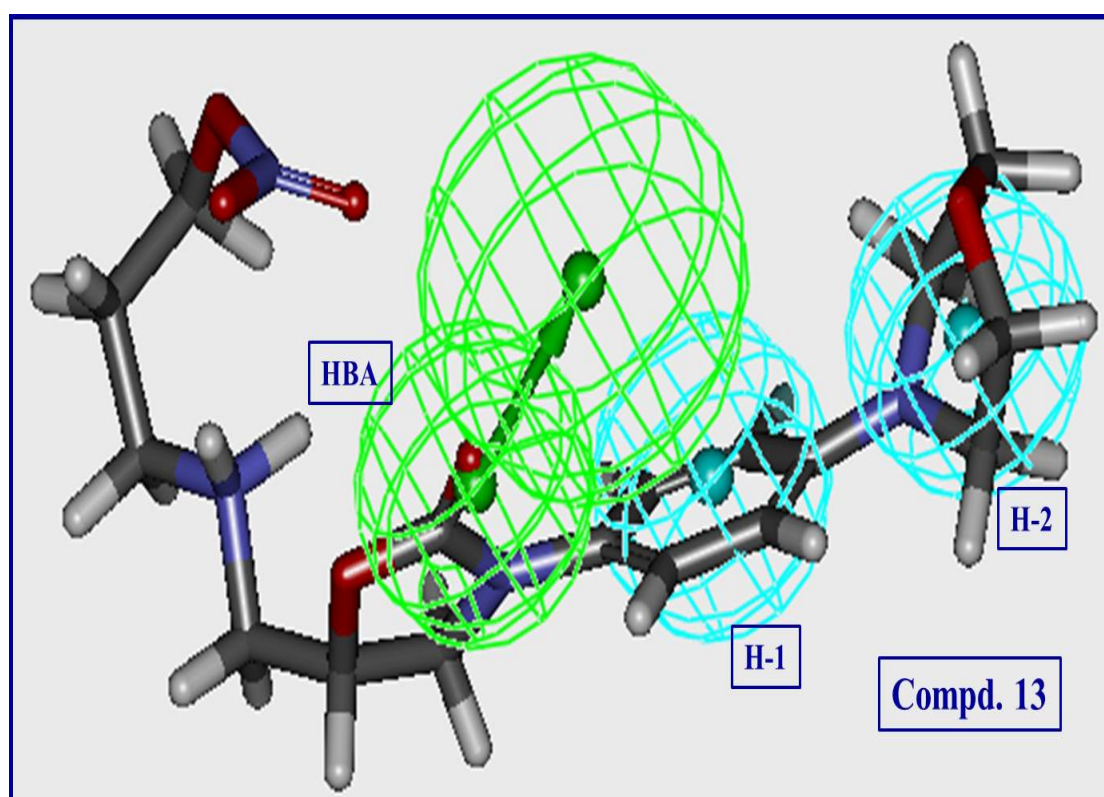

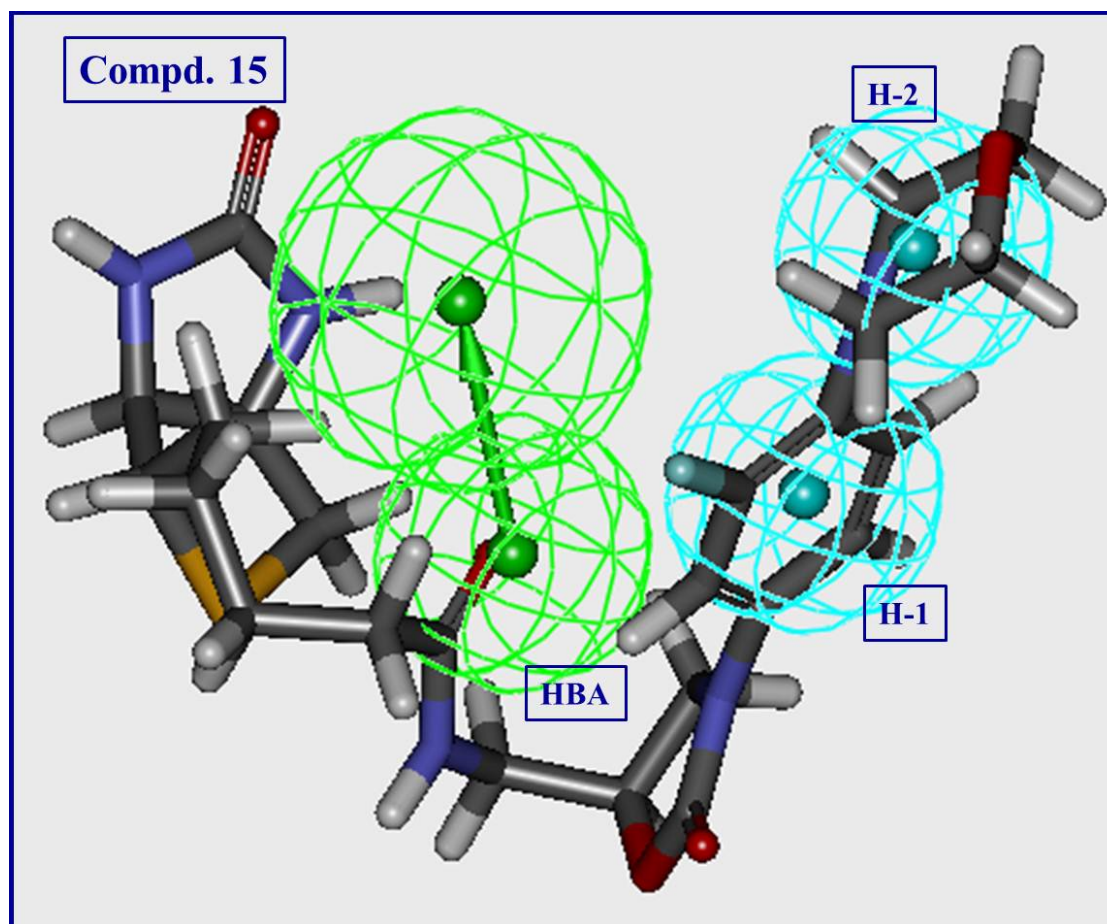

**Fig. S5.** 3D-pharmacophore model mapped on the tested compounds against *S. aureus*.



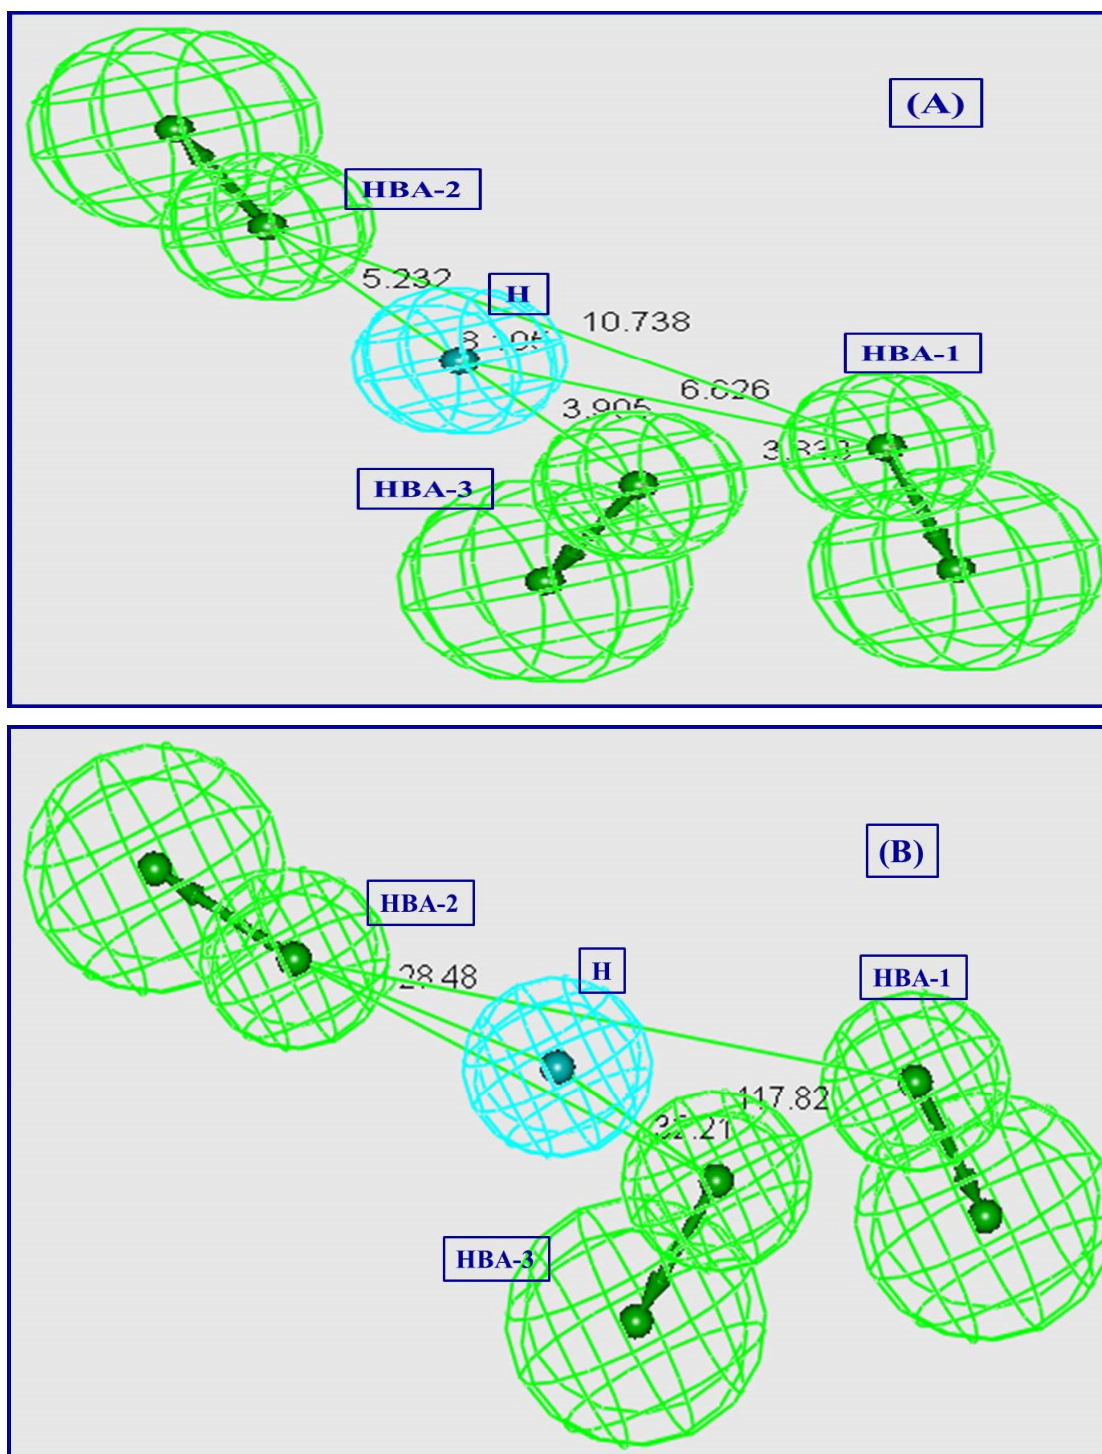

**Fig. S6.** (A) Constraint distances “HBA-1 – HBA-2 = 10.738, HBA-1 – HBA-3 = 3.833, HBA-2 – HBA-3 = 8.105, HBA-1 – H = 6.626, HBA-2 – H = 5.232, HBA-3 – H = 3.905 Å”, (B) Constraint angle “HBA-1 – HBA-2 – HBA-3 = 17.17, HBA-1 – HBA-2 – H = 28.48, HBA-1 – HBA-3 – H = 117.82, HBA-2 – HBA-2 – H = 32.21 °” of the generated 3D-pharmacophore for the tested compounds against *B. subtilis*.

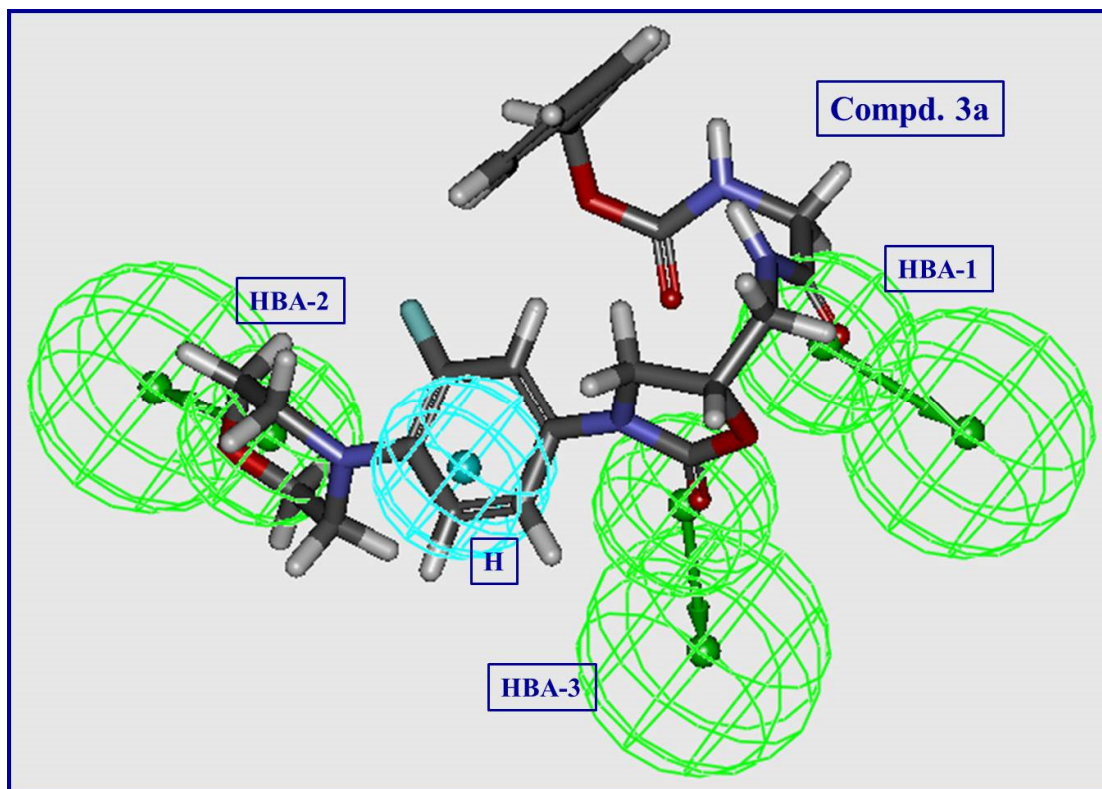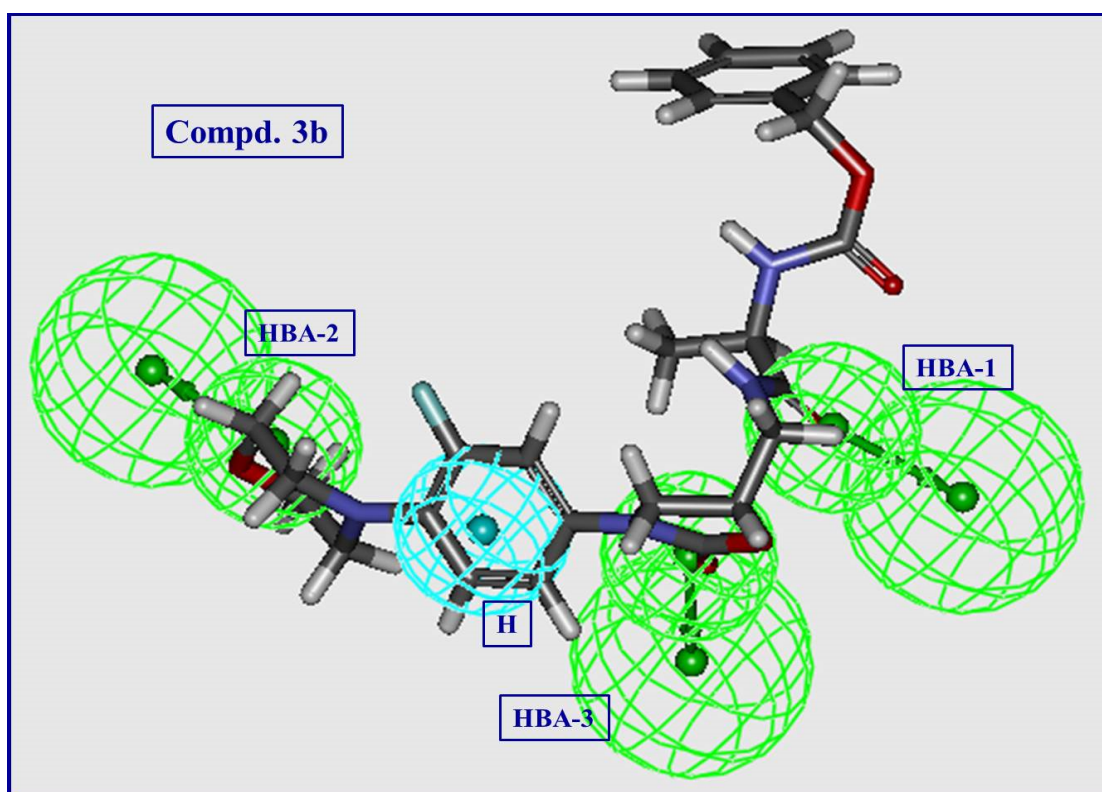



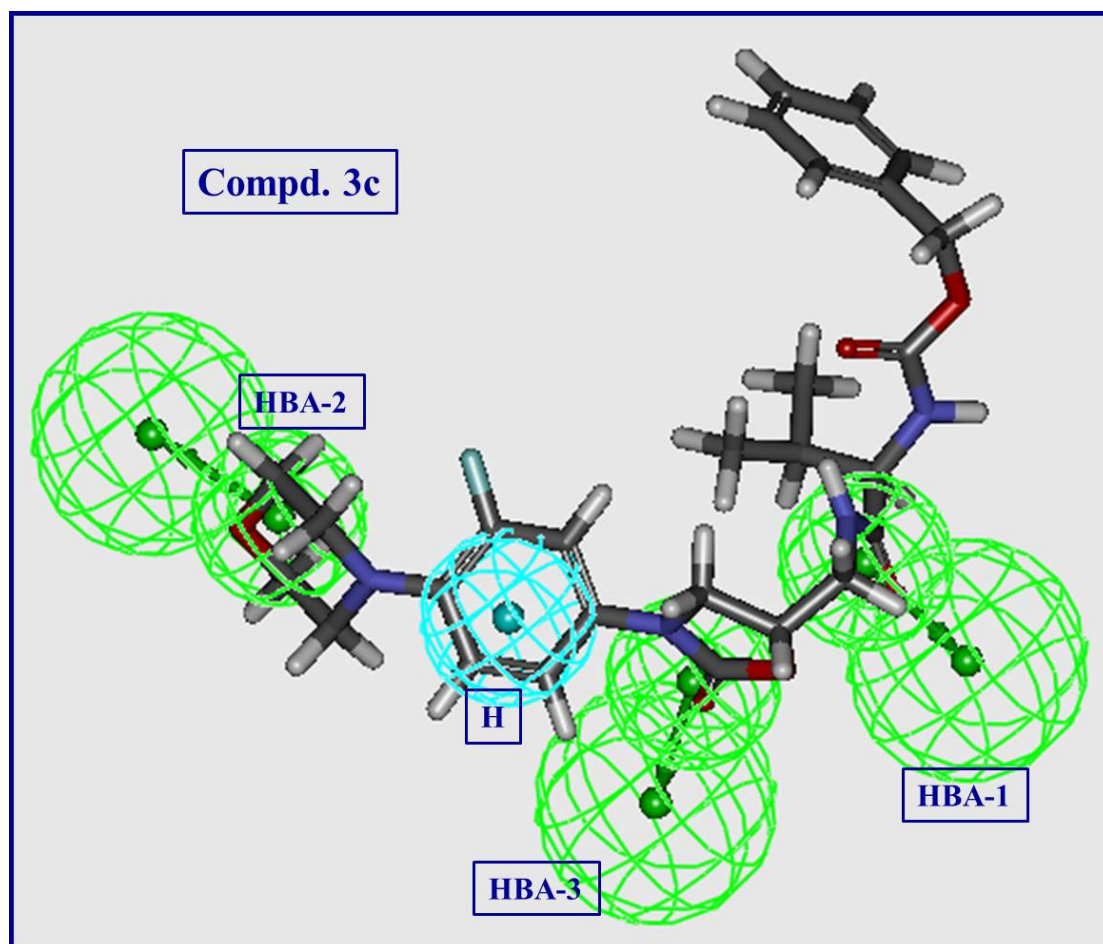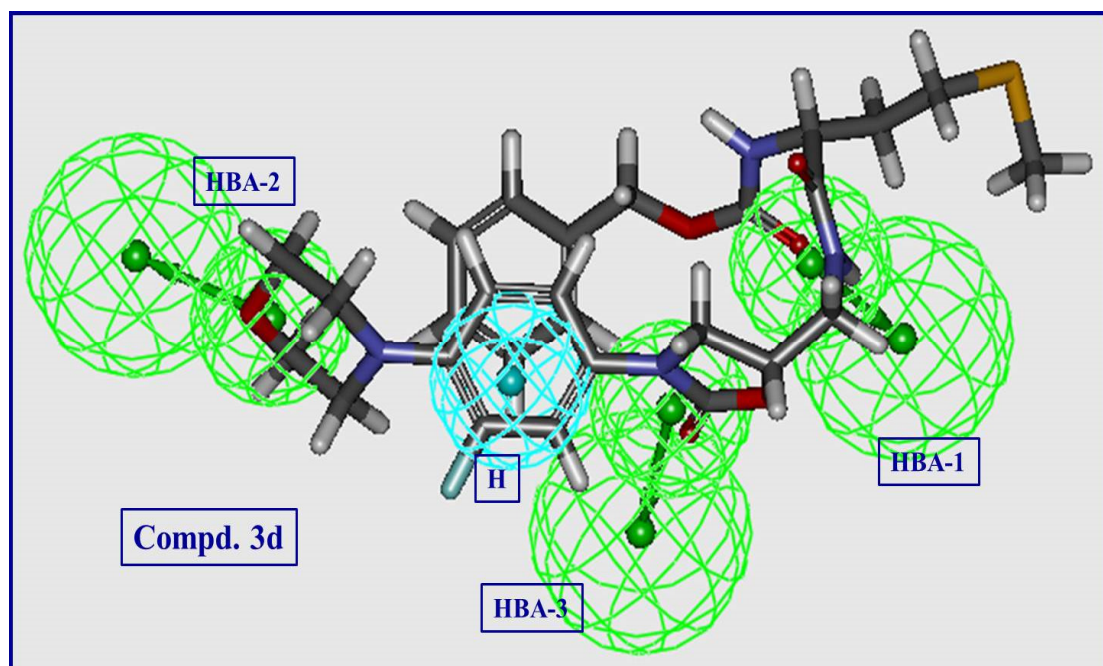

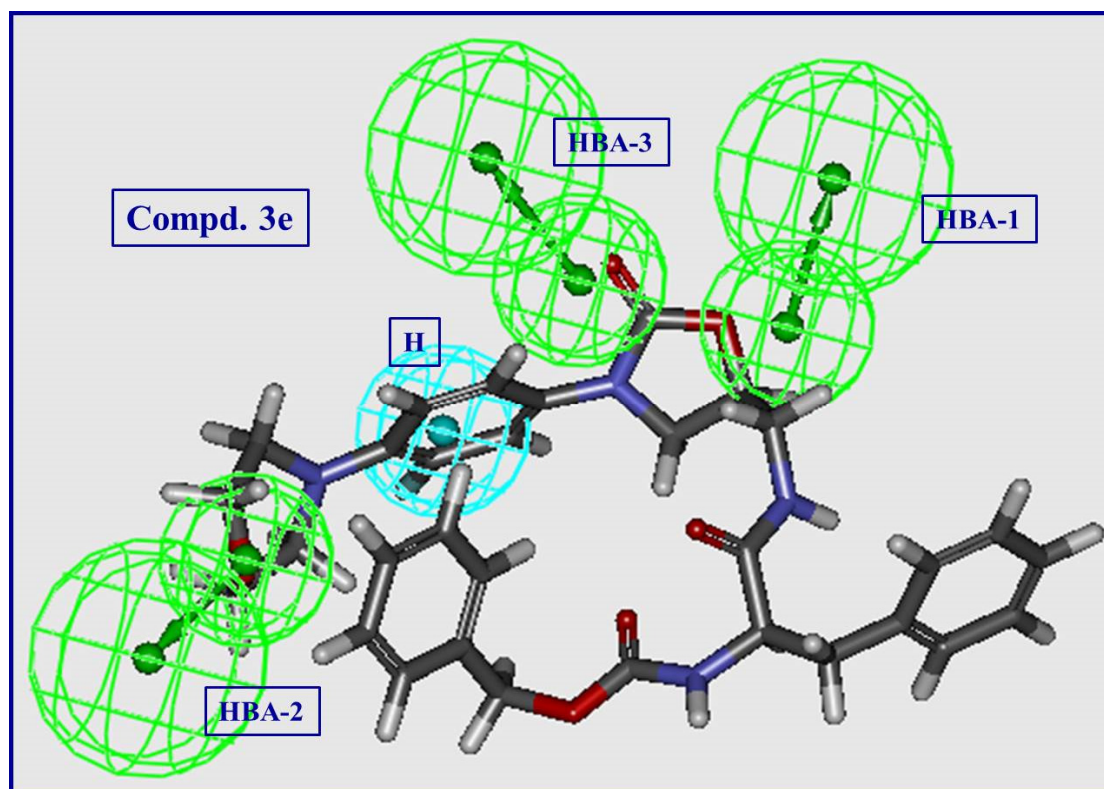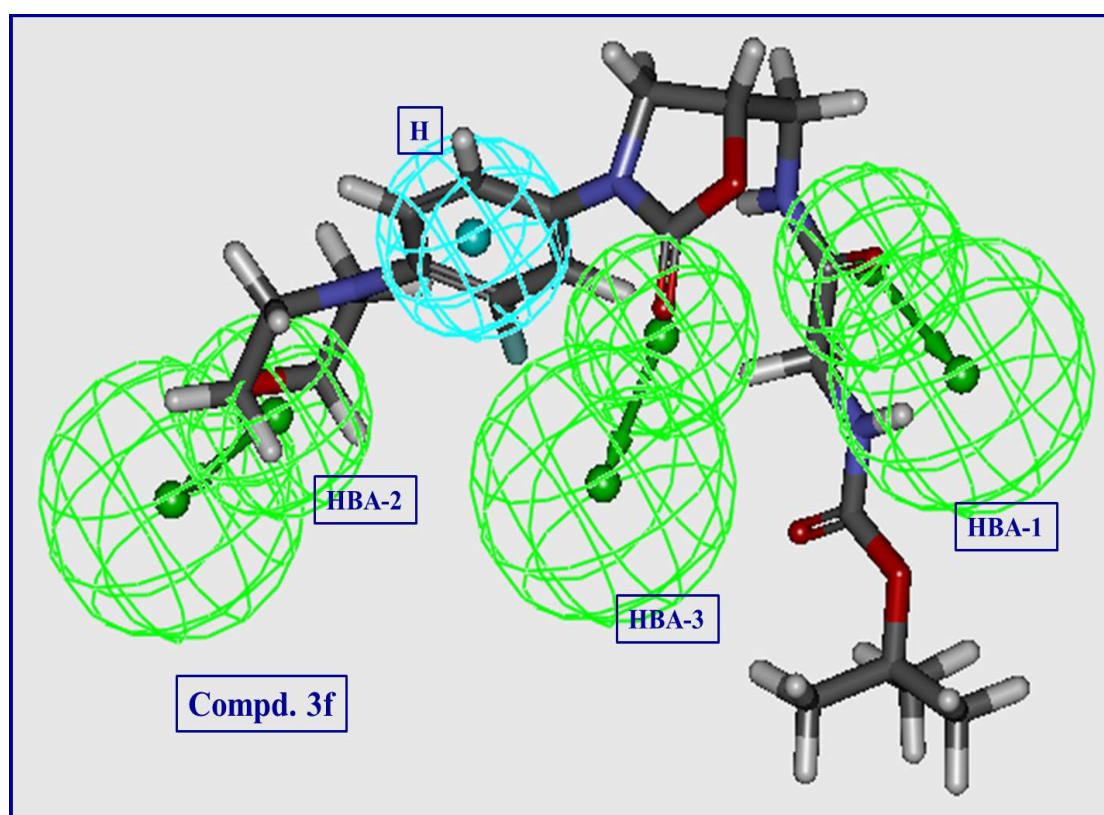



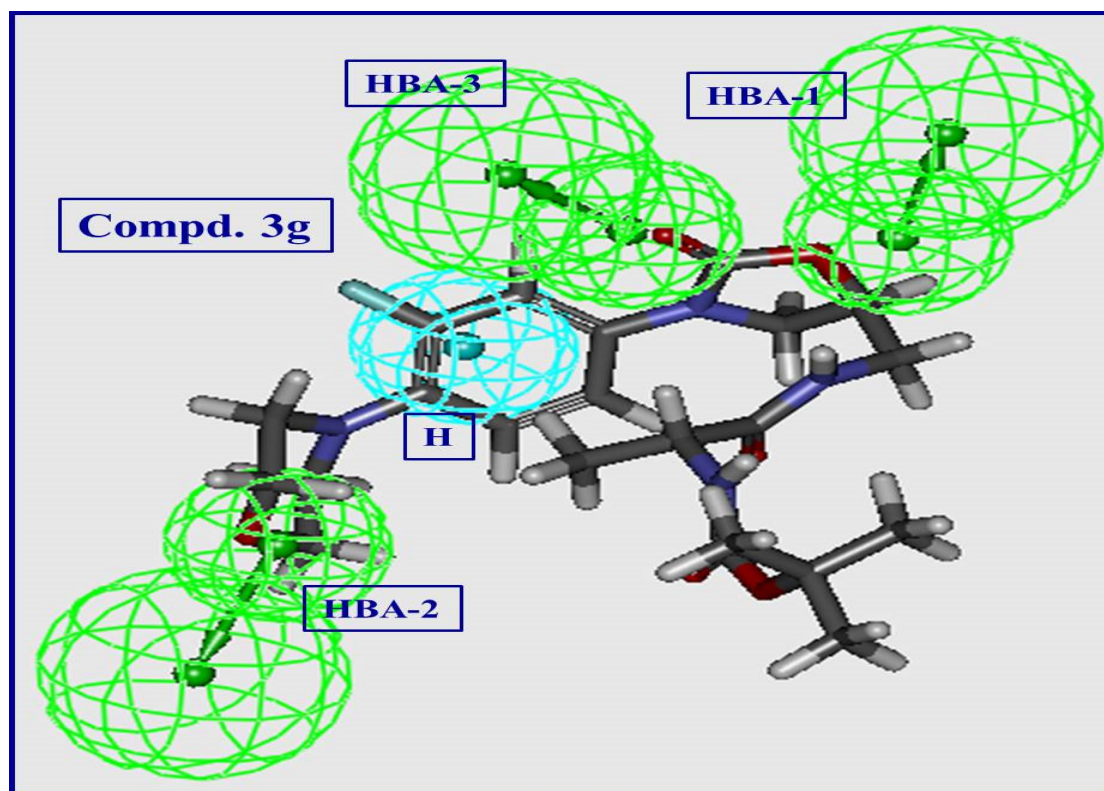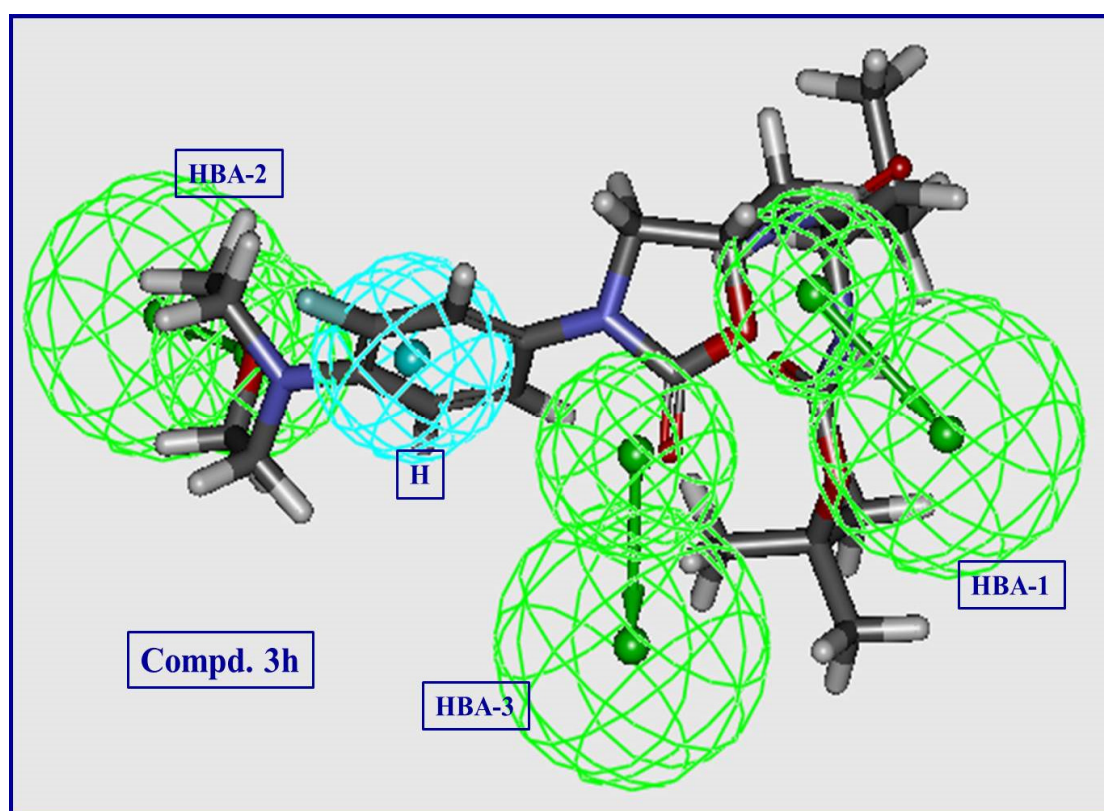

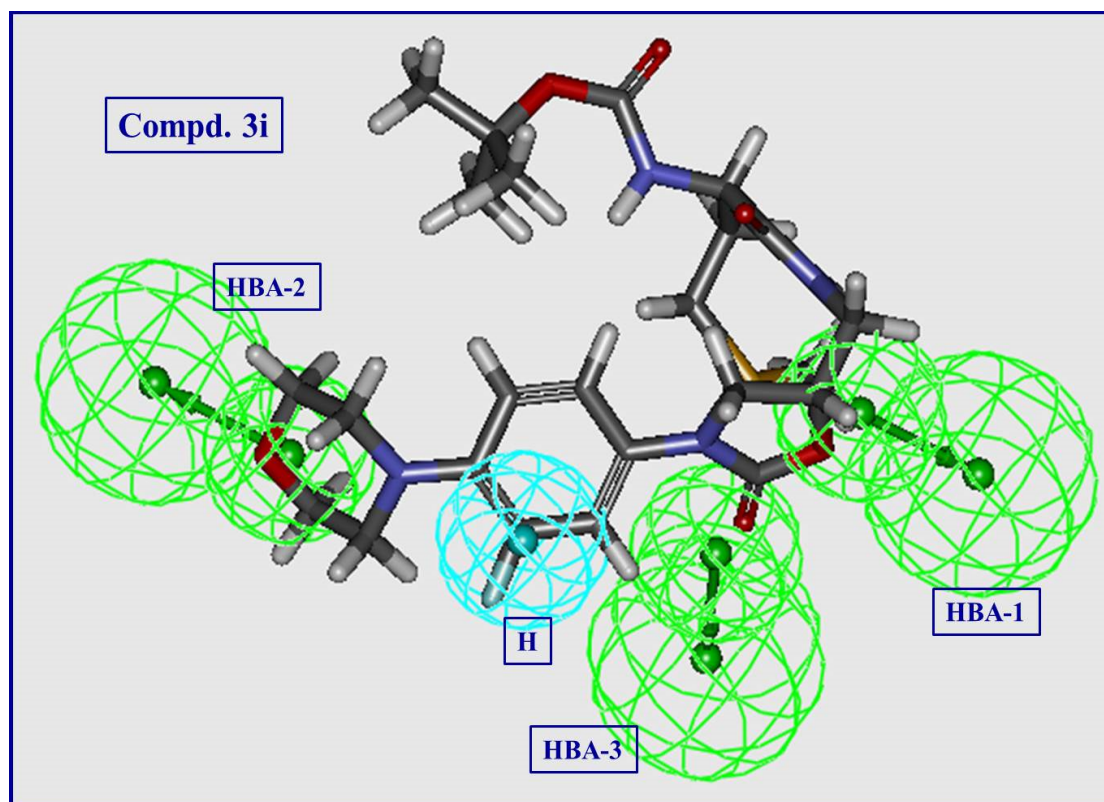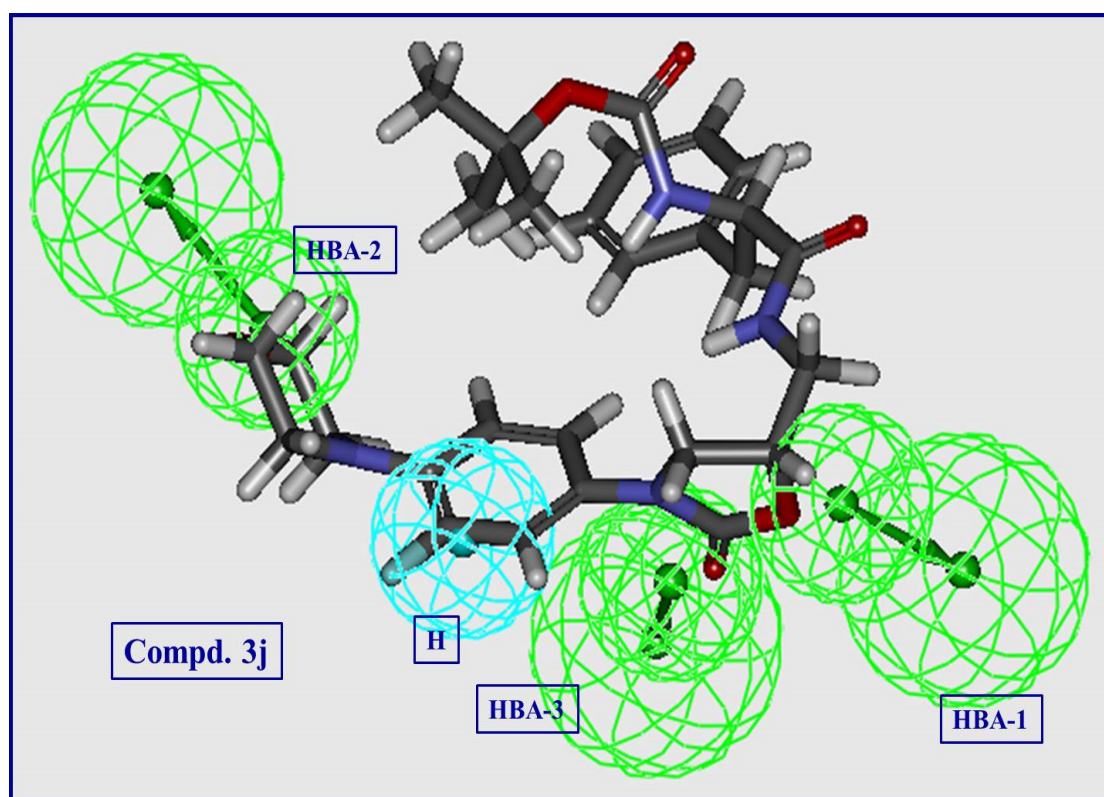



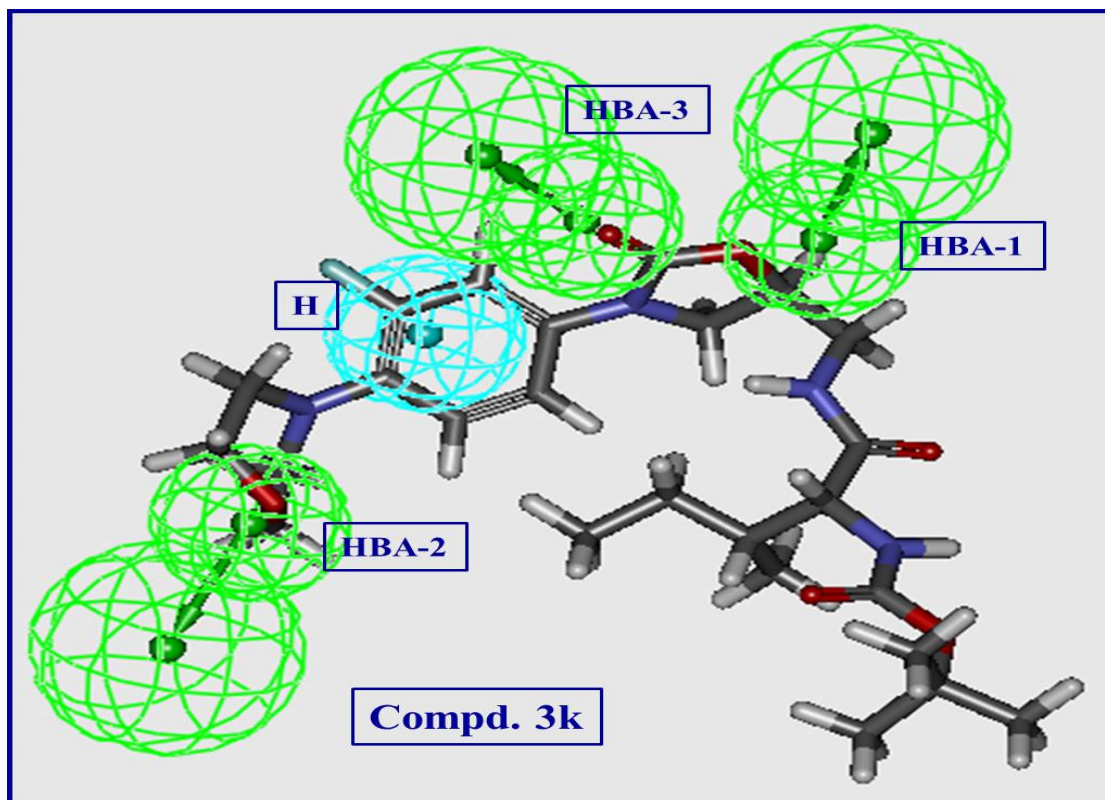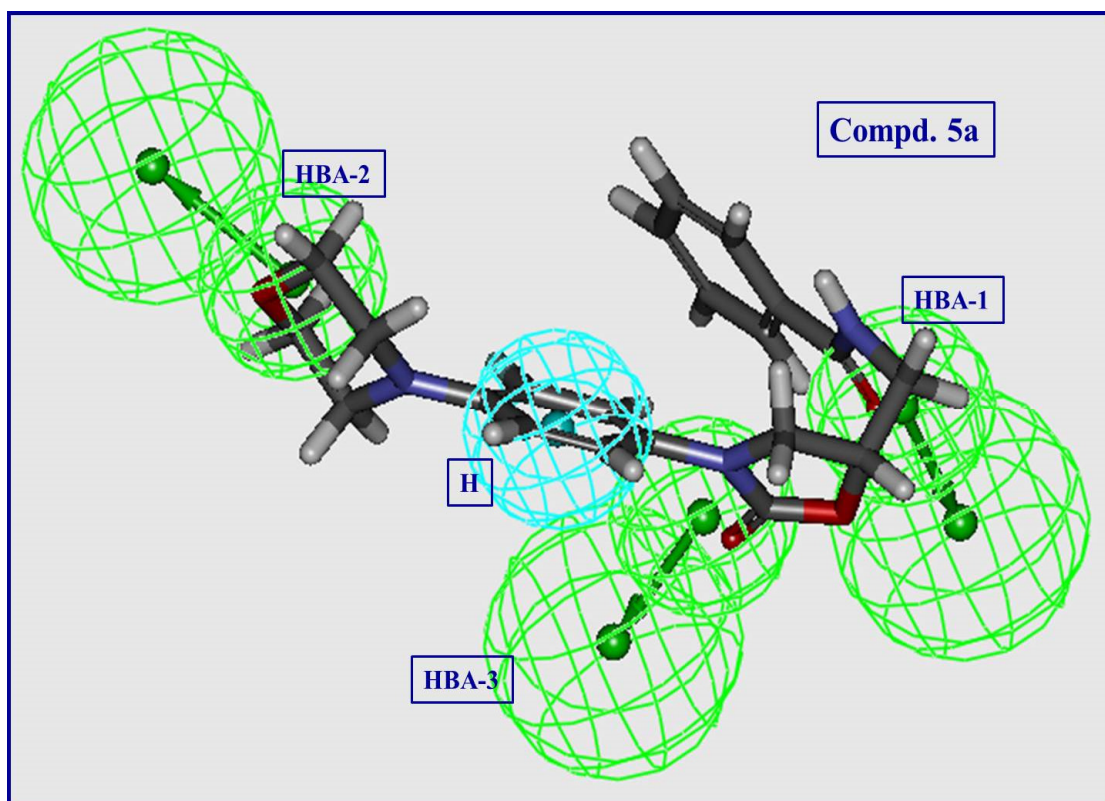

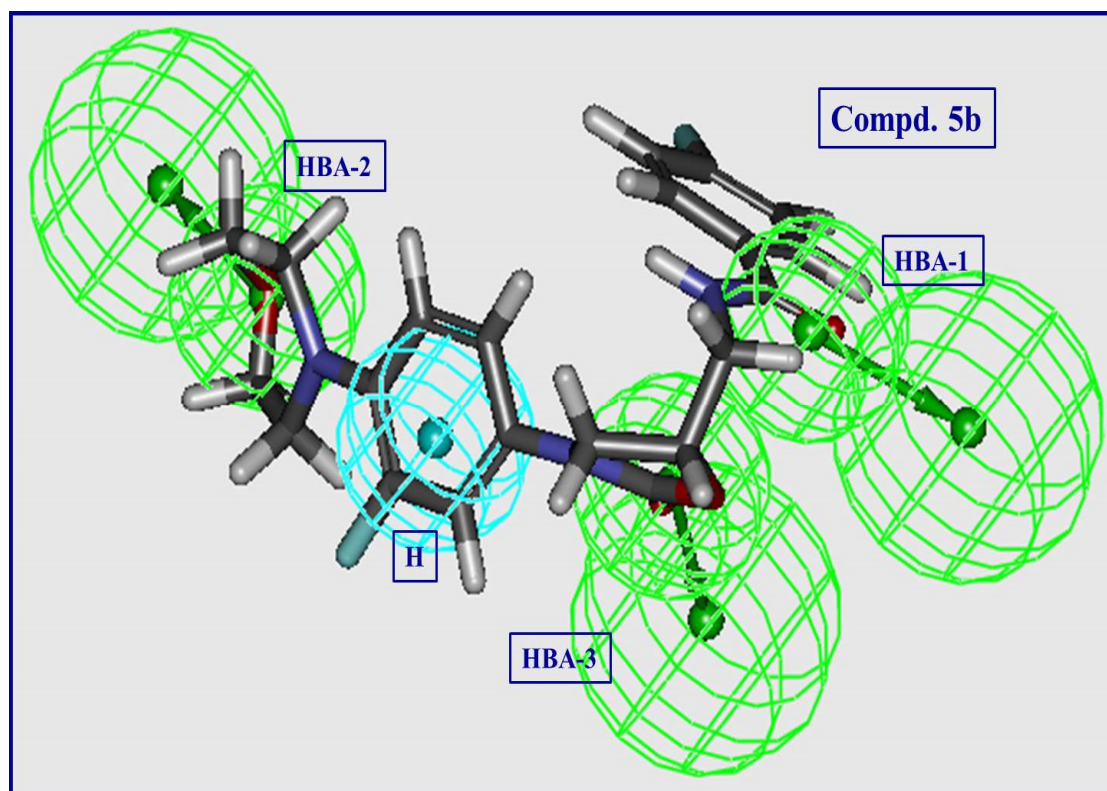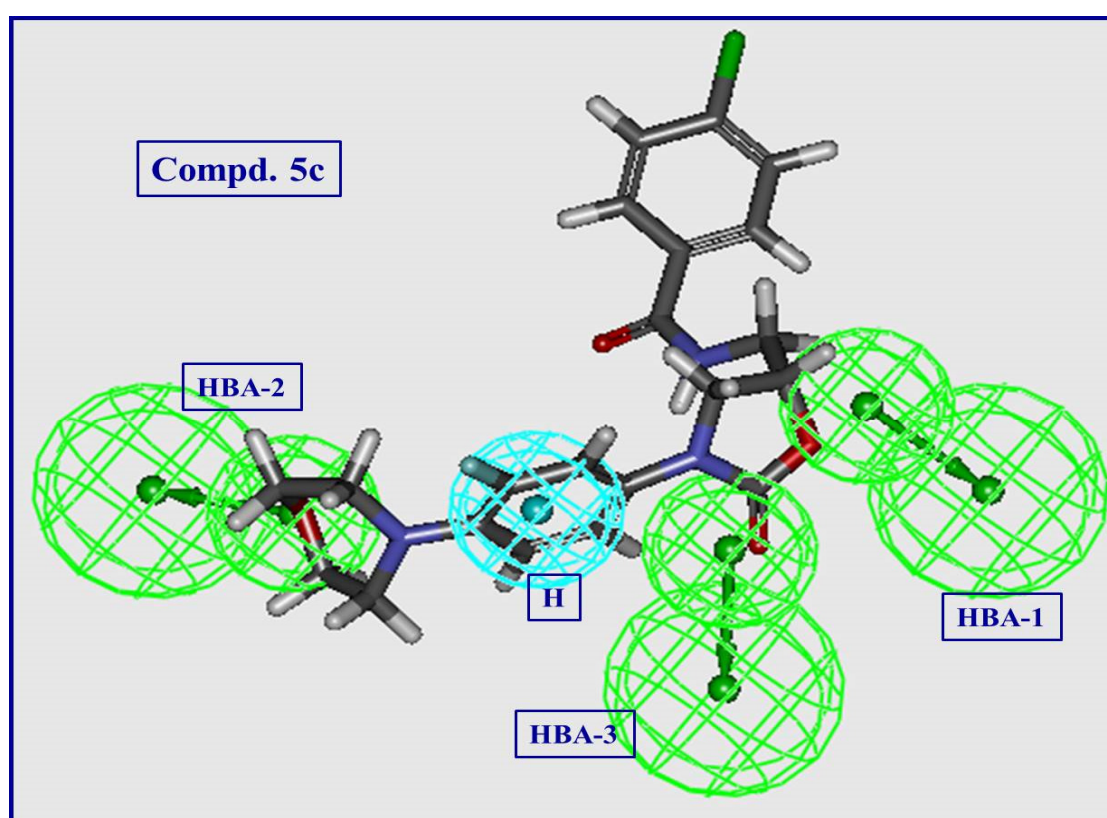



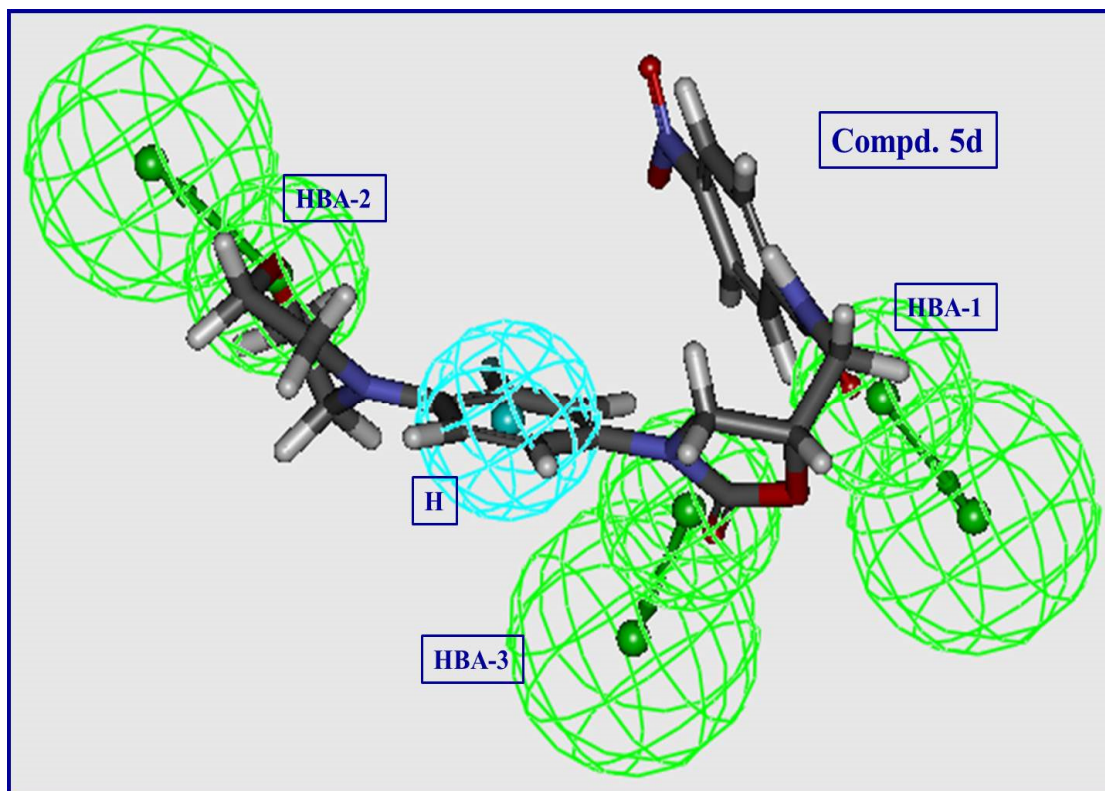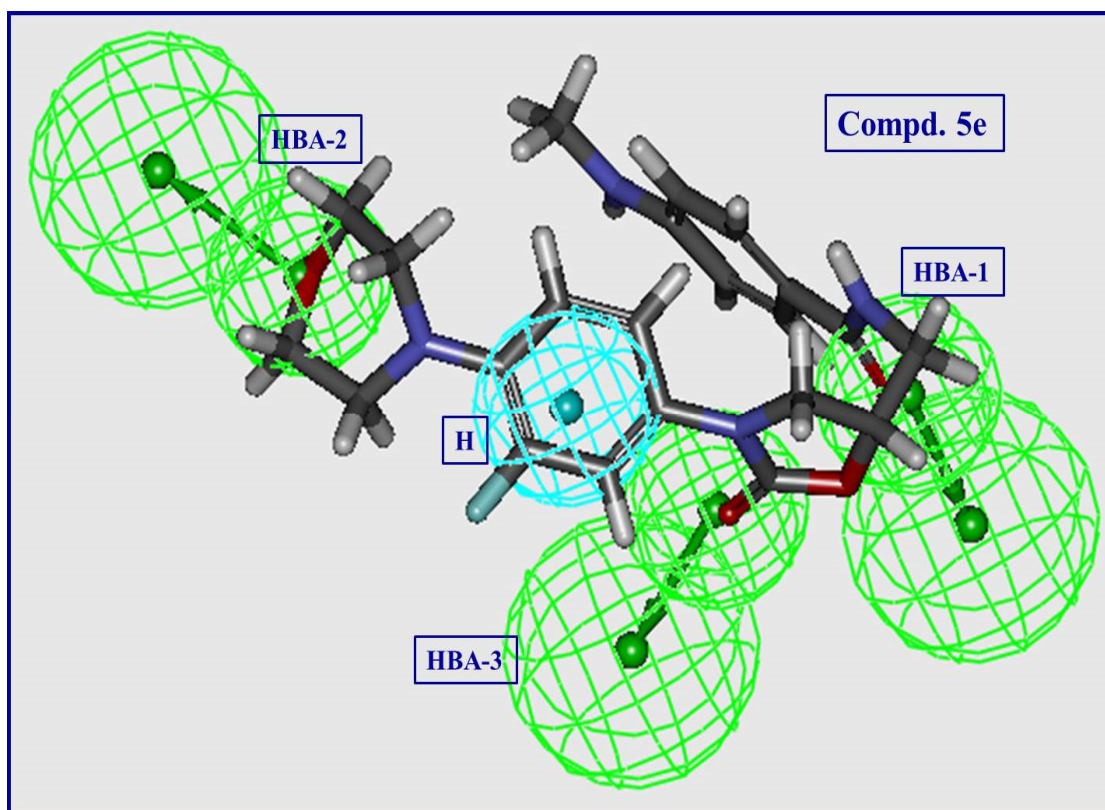

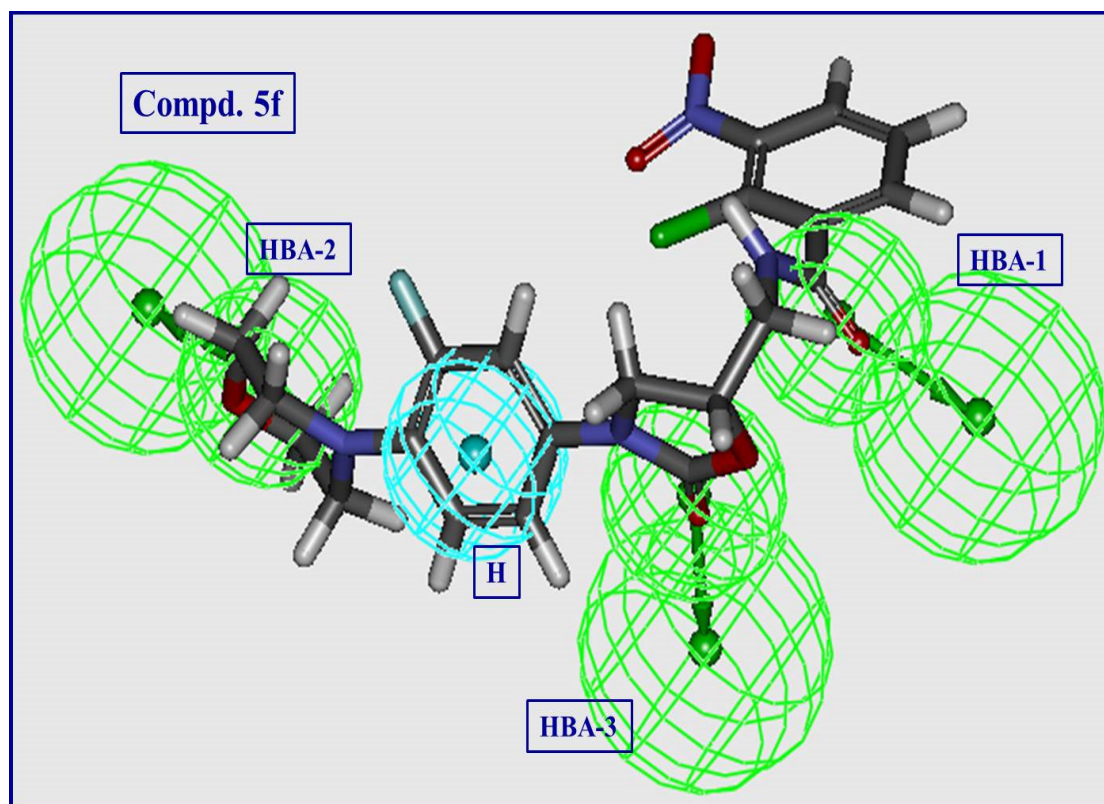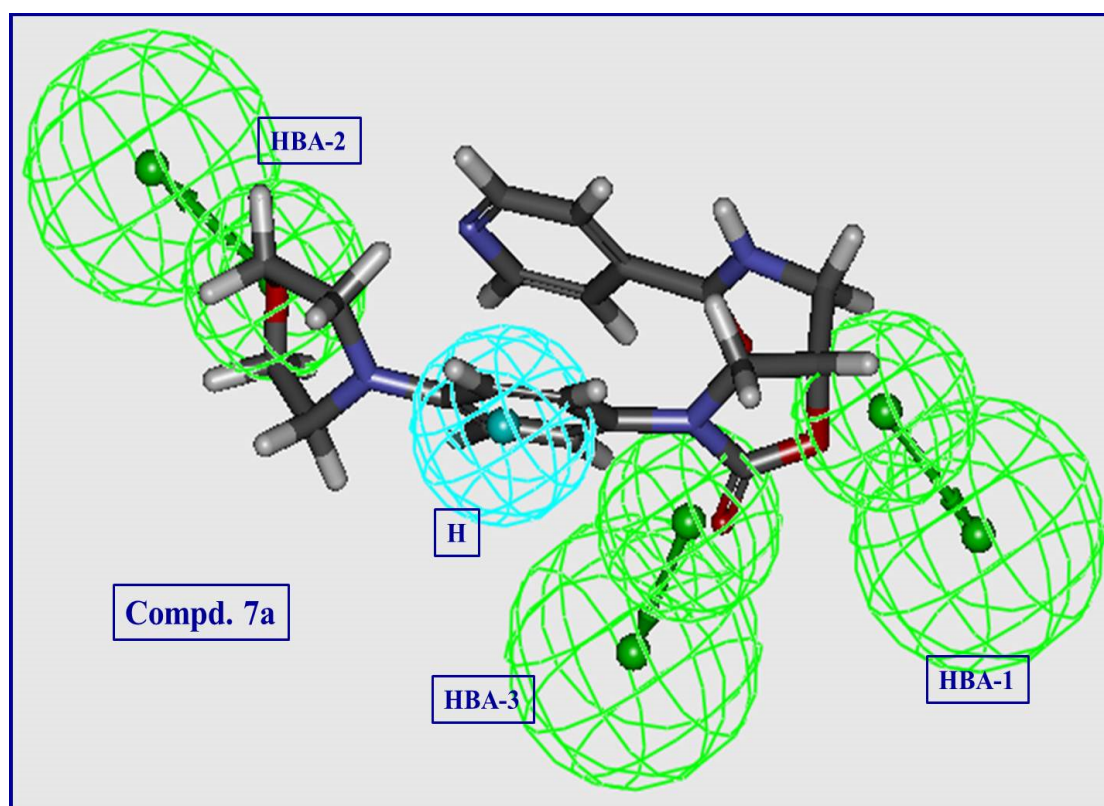



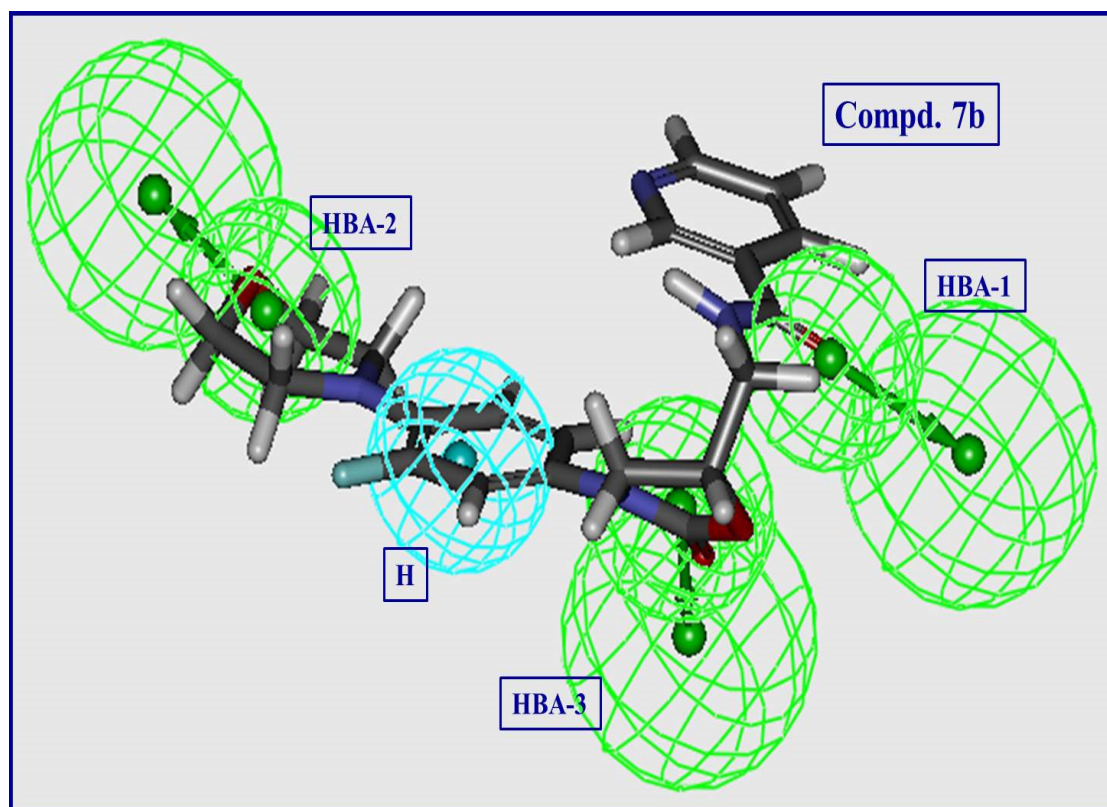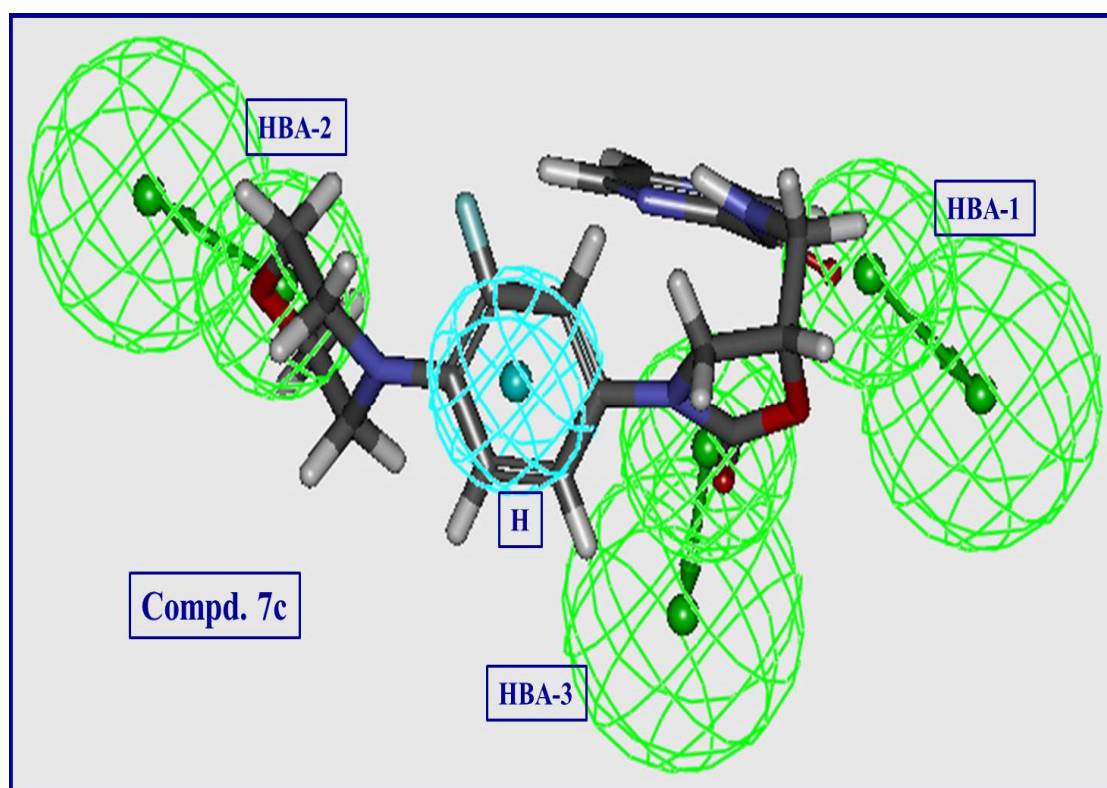

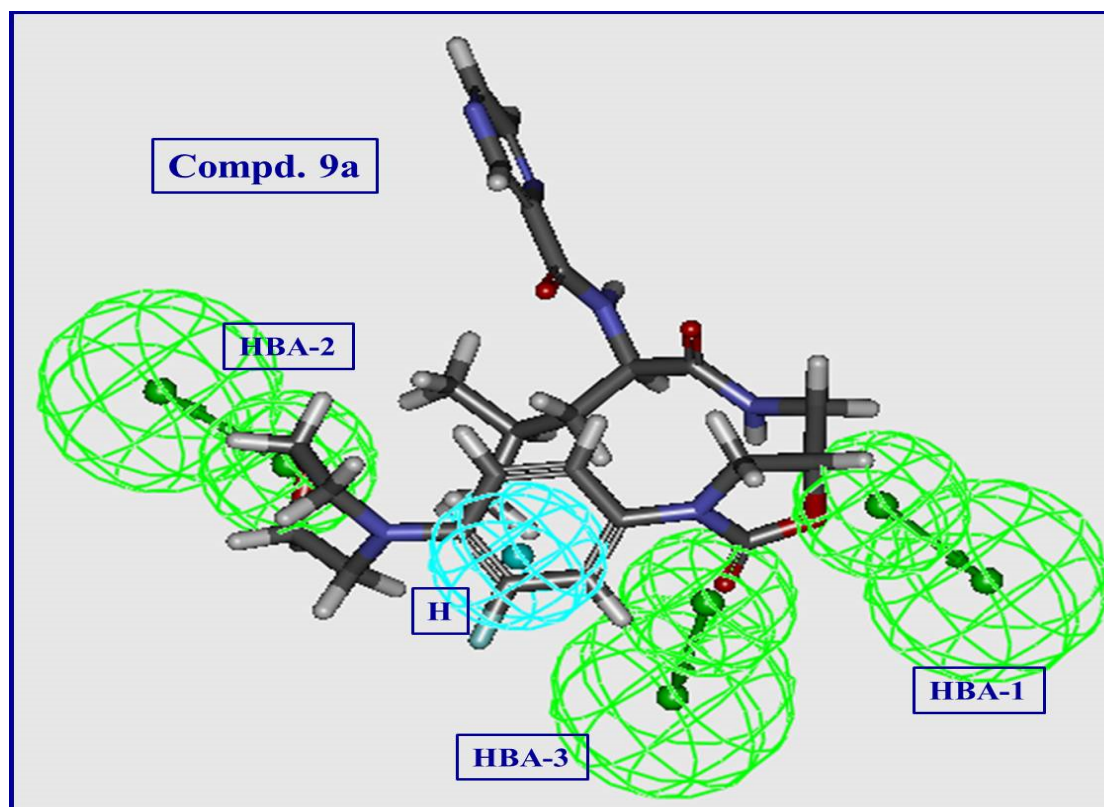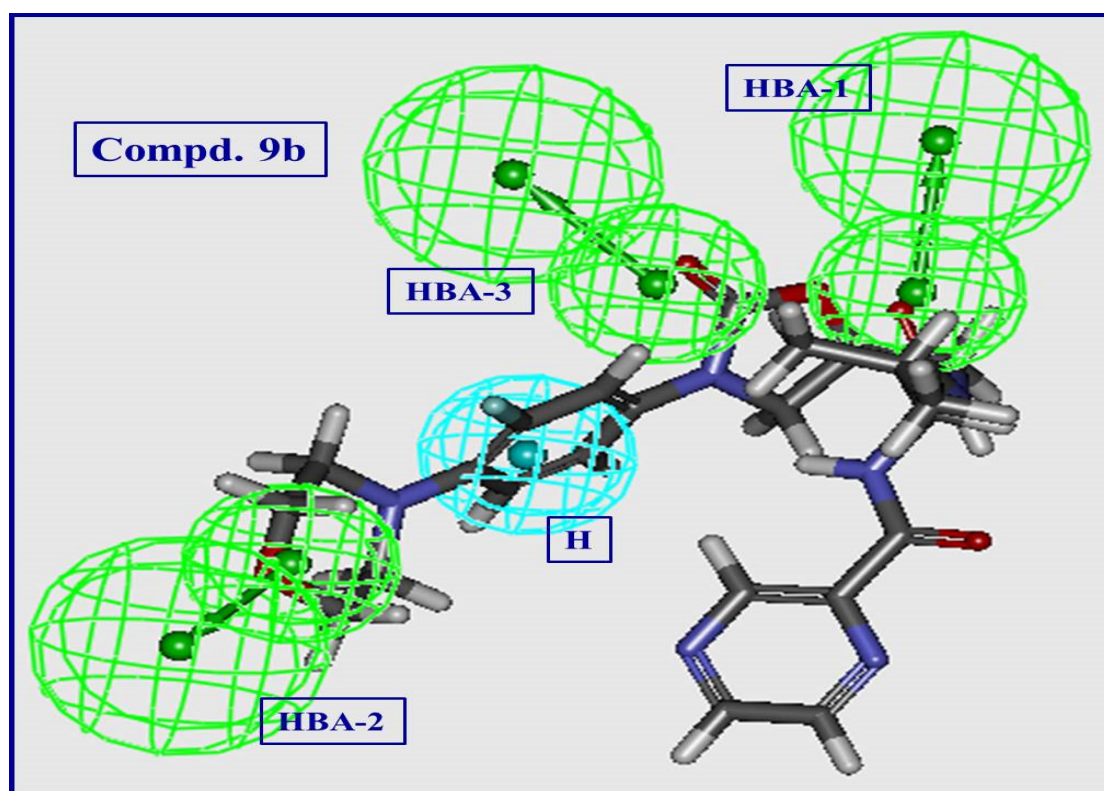



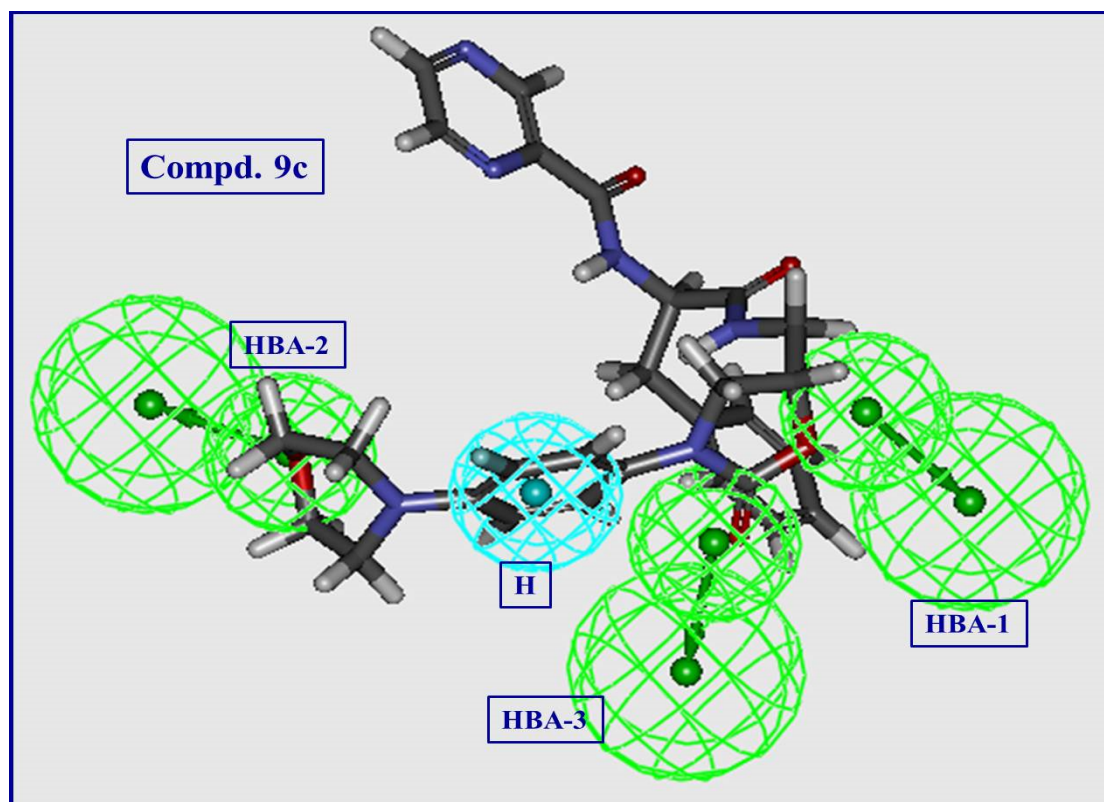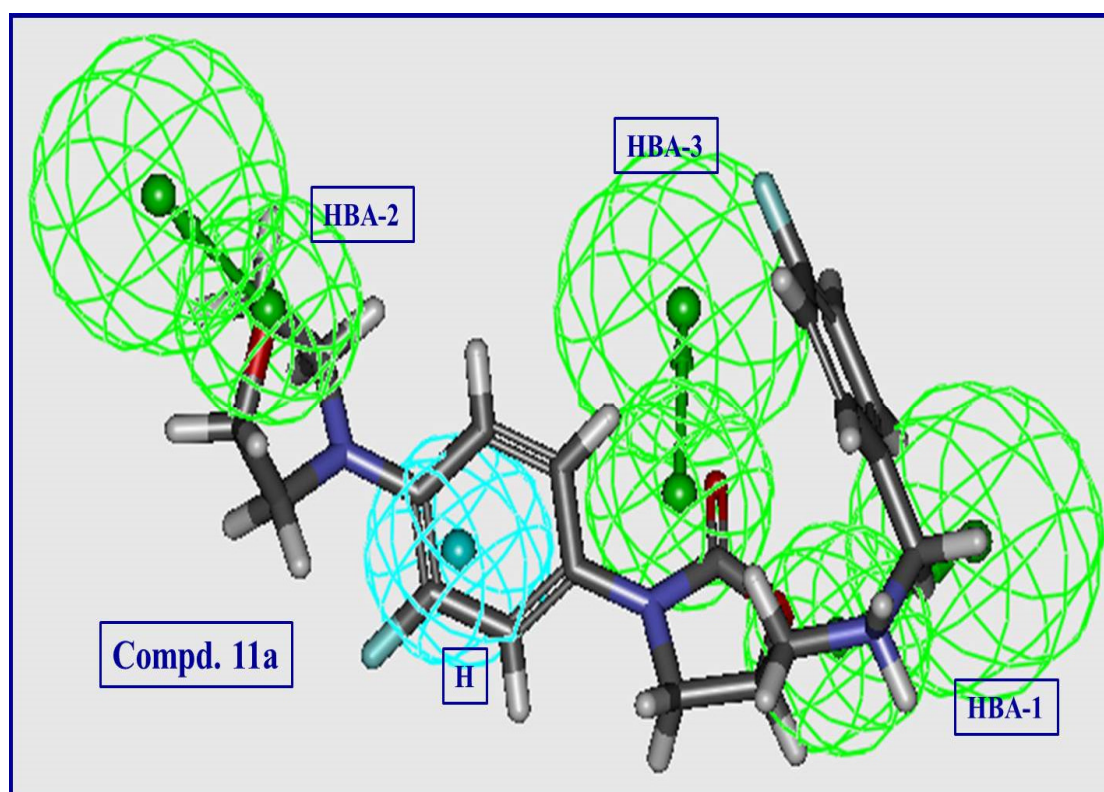

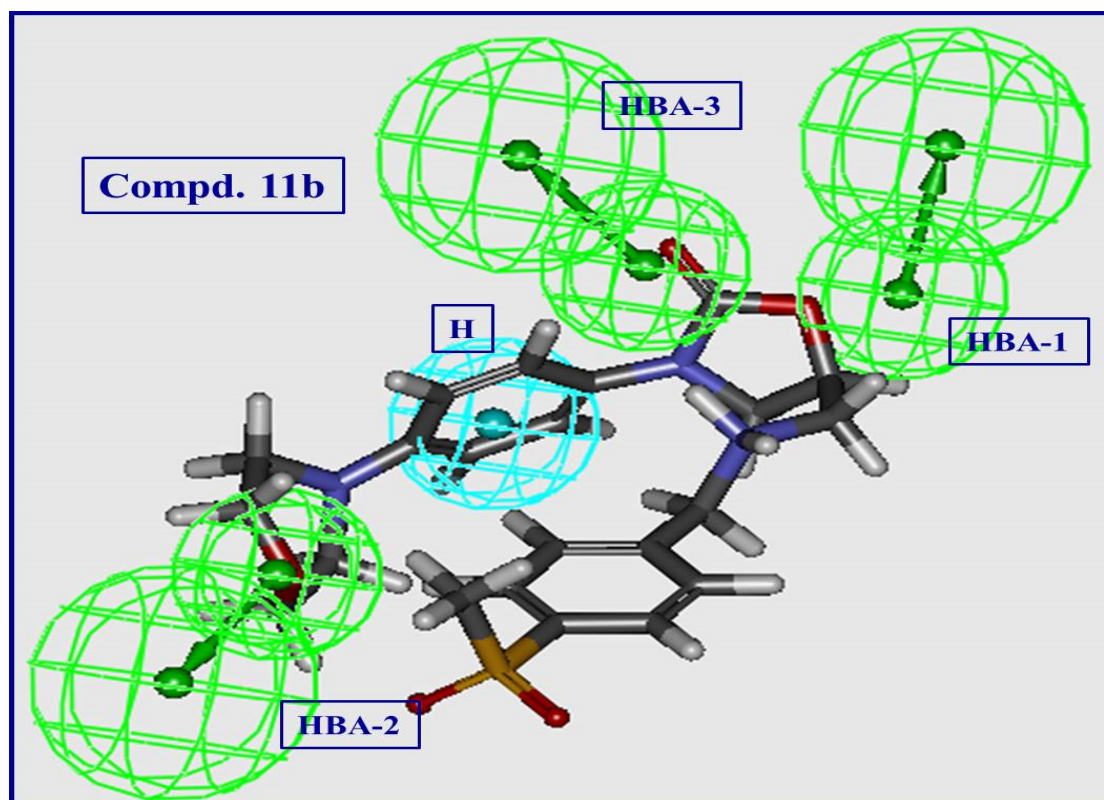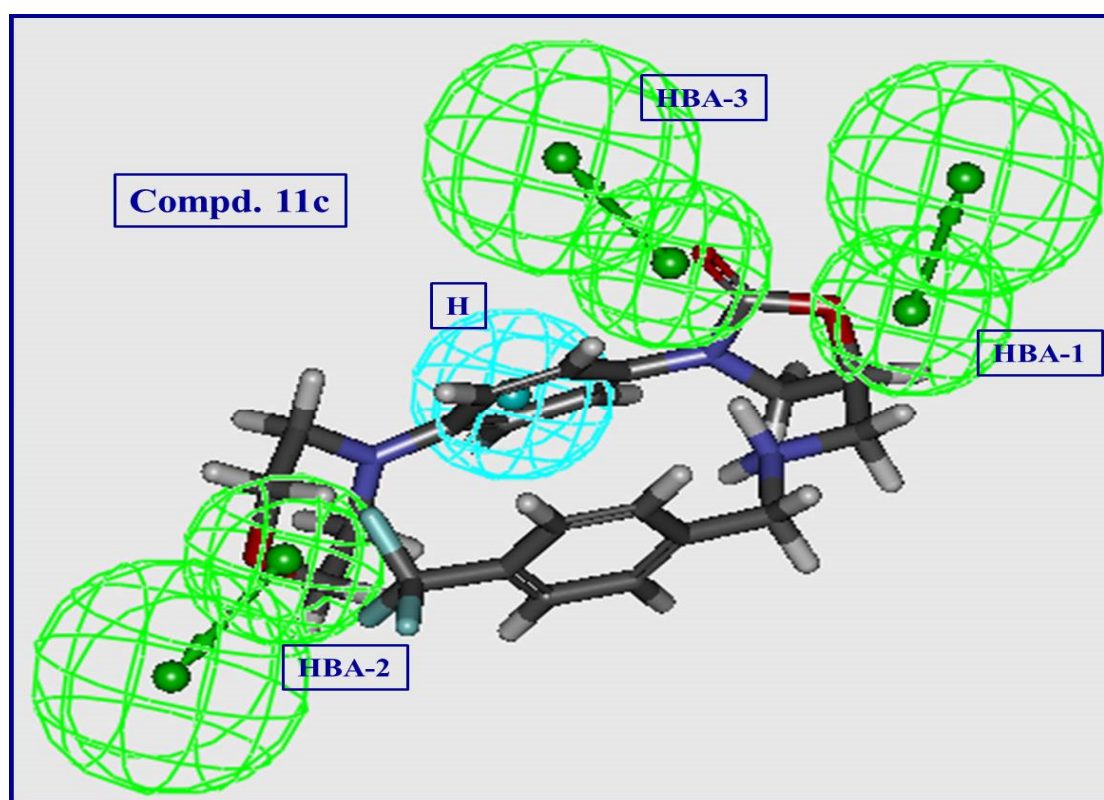



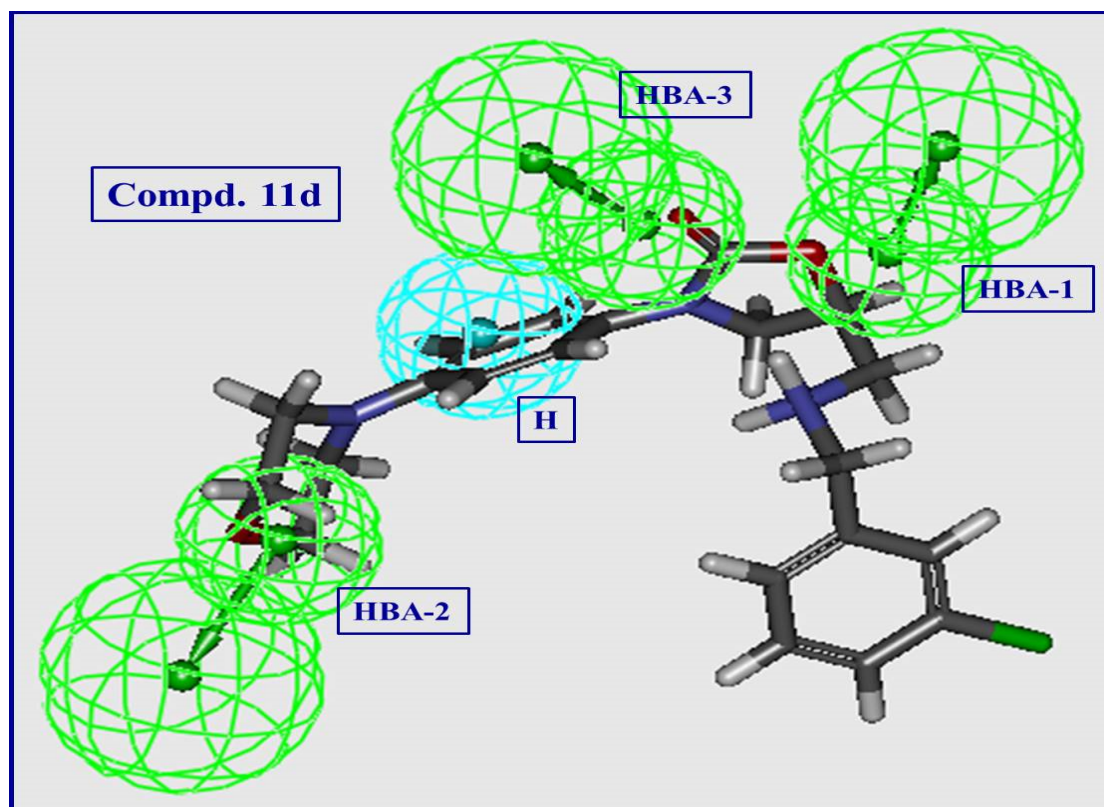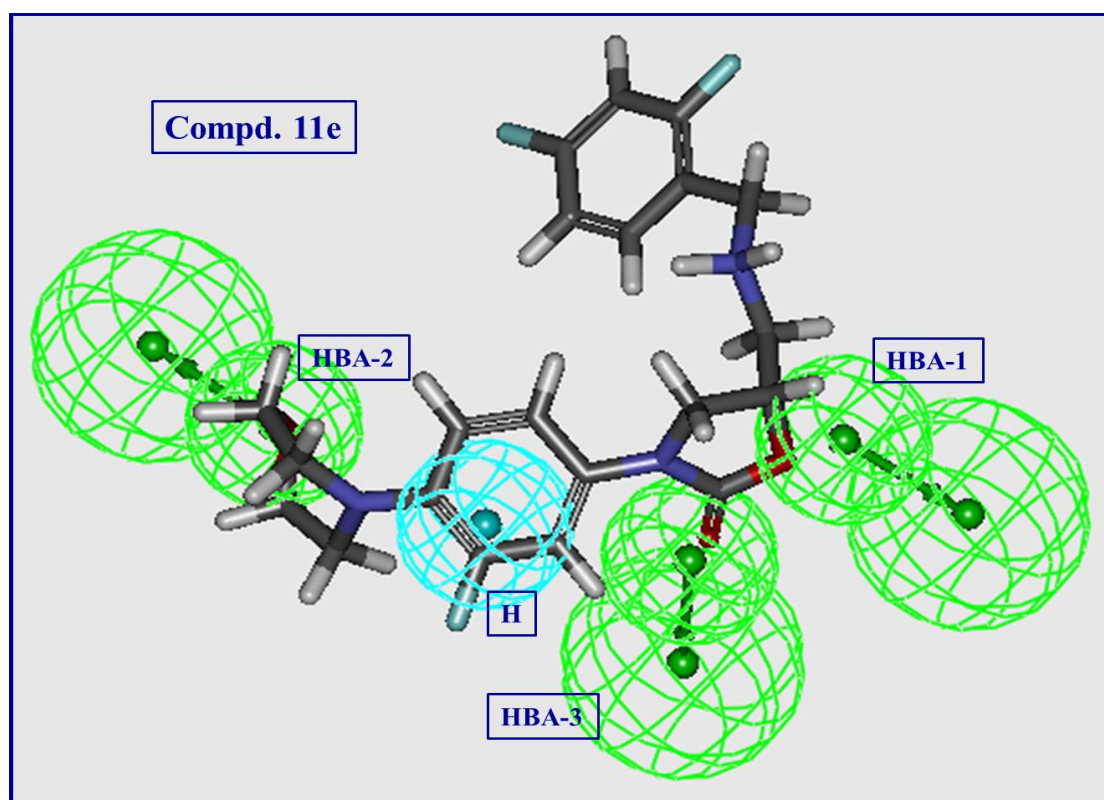

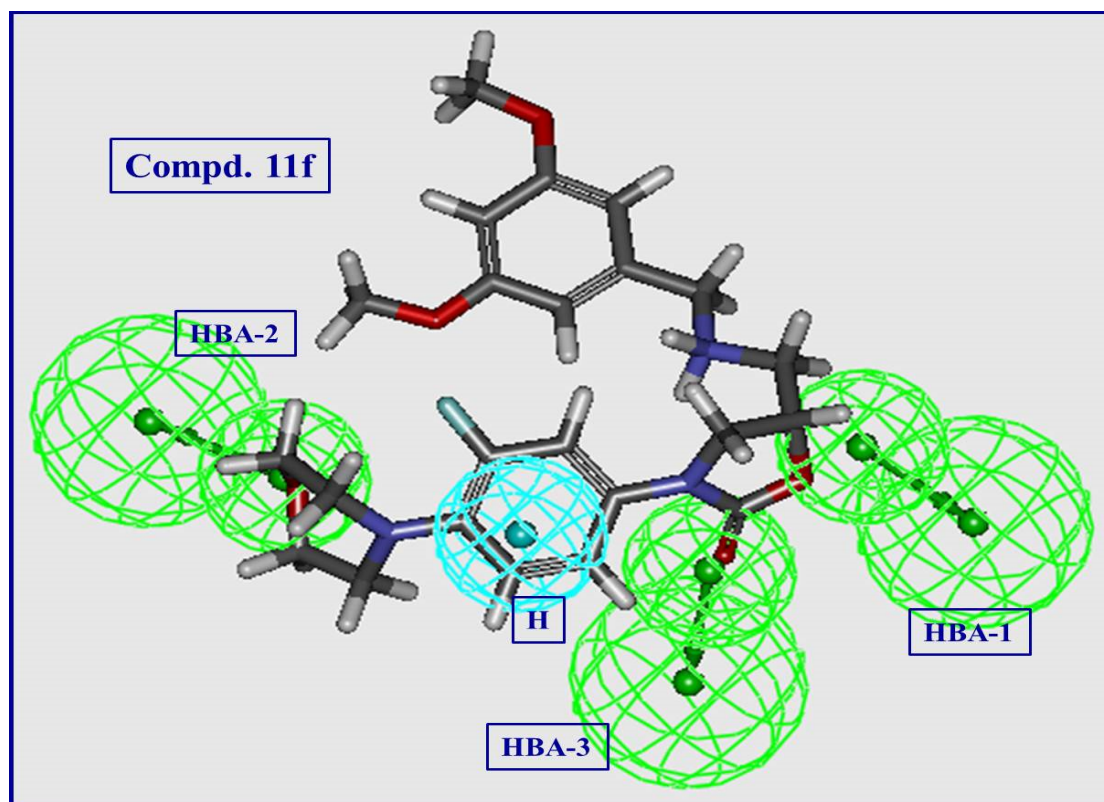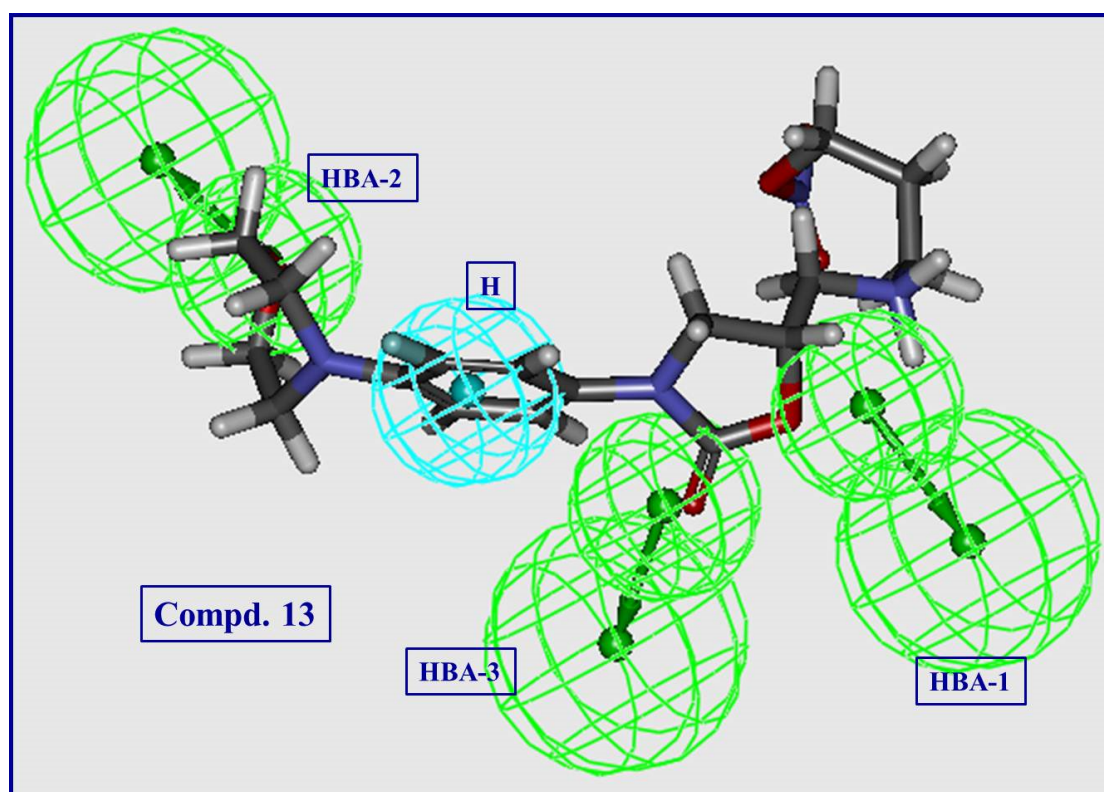

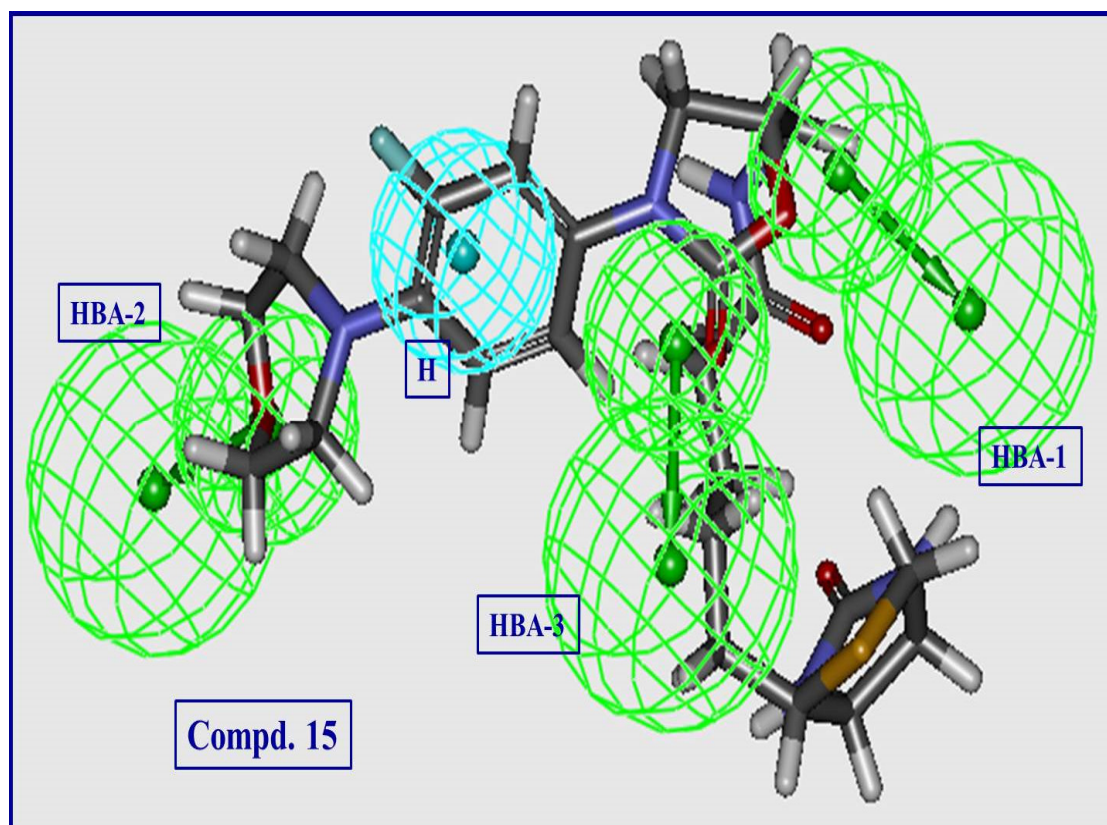

**Fig. S7.** 3D-pharmacophore model mapped on the tested compounds against *B. subtilis*.
